# Supplementary material for: BioPreDyn-bench: a suite of benchmark problems for dynamic modelling in systems biology
Source: PubMed Central journal article supplement (PMC4342829; doi:10.1186/s12918-015-0144-4), 2015-02-20
Supplement: 12918_2015_144_MOESM1_ESM.pdf [file 12918_2015_144_MOESM1_ESM.pdf]

# **BioPreDyn-bench: a suite of benchmark problems for dynamic modelling in systems biology – Additional File 1 (supplementary information)**

Alejandro F. Villaverde<sup>1</sup>, David Henriques<sup>1,2</sup>, Kieran Smallbone<sup>3</sup>, Sophia Bongard<sup>4</sup>, Joachim Schmid<sup>4</sup>, Damjan Cicin-Sain<sup>5,6</sup>, Anton Crombach<sup>5,6</sup>, Julio Saez-Rodriguez<sup>2</sup>, Klaus Mauch<sup>4</sup>, Eva Balsa-Canto<sup>1</sup>, Pedro Mendes<sup>3</sup>, Johannes Jaeger<sup>5,6\*</sup>, Julio R. Banga<sup>1\*</sup>

**1 Bioprocess Engineering Group, IIM-CSIC, Eduardo Cabello 6, 36208 Vigo, Spain**

**2 European Molecular Biology Laboratory, European Bioinformatics Institute (EMBL-EBI), Wellcome Trust Genome Campus, Hinxton, Cambridge CB10 1SD, UK**

**3 School of Computer Science, Manchester Centre for Integrative Systems Biology, The University of Manchester, 131 Princess Street, Manchester, M1 7DN, United Kingdom**

**4 Insilico Biotechnology AG, Meitnerstraße 8, 70563 Stuttgart, Germany**

**5 EMBL/CRG Research Unit in Systems Biology, Centre for Genomic Regulation (CRG), Dr. Aiguader 88, 08003 Barcelona, Spain**

**6 Universitat Pompeu Fabra (UPF), Plaça de la Mercé, 10, 08002 Barcelona, Spain**

**\* E-mail: julio@iim.csic.es, yogi.jaeger@crg.eu**

February 9, 2015

# Contents

|          |                                                                                    |           |
|----------|------------------------------------------------------------------------------------|-----------|
| <b>1</b> | <b>Implementations and files</b>                                                   | <b>1</b>  |
| <b>2</b> | <b>Requirements, installation, and instructions</b>                                | <b>9</b>  |
| 2.1      | COPASI . . . . .                                                                   | 9         |
| 2.2      | Matlab . . . . .                                                                   | 10        |
| 2.2.1    | Pre-compiled (fixed) vs. editable dynamics in the Matlab implementations . . . . . | 11        |
| 2.3      | AMIGO . . . . .                                                                    | 11        |
| 2.4      | C . . . . .                                                                        | 12        |
| 2.4.1    | Requirements and installation instructions for Windows . . . . .                   | 13        |
| 2.4.2    | Requirements and installation instructions for Linux and macOSx . . . . .          | 14        |
| 2.4.3    | Brief overview of the template file . . . . .                                      | 15        |
| 2.4.4    | Brief Note on Compiler Versions . . . . .                                          | 15        |
| <b>3</b> | <b>Testing reproducibility</b>                                                     | <b>16</b> |
| <b>4</b> | <b>Models: parameters, outputs, and data</b>                                       | <b>20</b> |
| 4.1      | B1: <i>S. cerevisiae</i> . . . . .                                                 | 20        |
| 4.2      | B2: dynamic CCM of <i>E. coli</i> . . . . .                                        | 55        |
| 4.3      | B3: regulation of the CCM of <i>E. coli</i> . . . . .                              | 61        |
| 4.4      | B4: CHO . . . . .                                                                  | 66        |
| 4.5      | B5: signal transduction logic model . . . . .                                      | 70        |
| 4.6      | B6: <i>Drosophila</i> . . . . .                                                    | 73        |
| <b>5</b> | <b>Typical results: parameter estimation with local methods</b>                    | <b>83</b> |
| <b>6</b> | <b>Typical results: parameter estimation with eSS</b>                              | <b>85</b> |
| 6.1      | B1: <i>S. cerevisiae</i> . . . . .                                                 | 87        |
| 6.2      | B2: dynamic CCM of <i>E. coli</i> . . . . .                                        | 89        |
| 6.3      | B3: regulation of the CCM of <i>E. coli</i> . . . . .                              | 91        |
| 6.4      | B4: CHO . . . . .                                                                  | 93        |
| 6.5      | B5: signal transduction logic model . . . . .                                      | 95        |
| 6.6      | B6: <i>Drosophila</i> . . . . .                                                    | 97        |

# 1 Implementations and files

The benchmarks in the BioPreDyn-bench collection are implemented in the following formats:

1. ready-to-run implementations in Matlab, AMIGO (a Matlab toolbox), and COPASI.
2. core implementations in C (which only need the user to write a small program as optimization driver, therefore allowing the use of any optimization code which can be interfaced with C). Example programs are given to facilitate this step.
3. partial implementations (systems dynamics plus initial conditions) in SBML (so they can be imported into any of the many software packages that support this format).

A description of these formats is given below:

- SBML [1] is a model representation format designed for systems biology applications. Please note that the SBML files only contain information about the model dynamics, not about the parameter estimation problem (the parameters to estimate are not specified, the objective function is not defined, data is not included, etc).
- C is a general purpose programming language. The C implementations provide model dynamics and calculation of the objective function value. Some aspects of the optimization problem have to be set by the user (initial point, parameter bounds, solver, etc).
- MATLAB is a high-level language and interactive environment for numerical computation, visualization, and programming. The MATLAB implementations, like the C ones, provide model dynamics and calculation of the objective function value. Additionally, example optimization files are provided that define a parameter estimation problem (specifying the initial point, parameter bounds, solver, and solver options), thus making the Matlab implementations ready-to-run.
- AMIGO [2] is a toolbox that works under Matlab and covers all the steps of the iterative identification procedure: local and global sensitivity analysis, local and global ranking of parameters, parameter estimation, identifiability analysis and optimal experimental design. The AMIGO implementations are ready-to-run: all the aspects of the parameter estimation problem are defined.
- COPASI [3] is a software application for simulation and analysis of biochemical networks and their dynamics. COPASI is a stand-alone program that supports models in the SBML standard. The COPASI implementations are ready-to-run: all the aspects of the parameter estimation problem are defined.

We indicate in Table S1 below, for each benchmark implementation, the operating system where it can be executed and additional software requirements (indicated inside parentheses).

For optimization purposes (parameter estimation), ready-to-run versions are provided in Matlab, AMIGO and COPASI. Additionally, the user can set up a parameter estimation problem in C using the corresponding files. A list of all the model files is given in Tables S2–S7. More detailed information is provided in the README files included with every implementation.

**Table S1. Implementations and operating systems**

| Implementation | B1                   | B2                   | B3                   |
|----------------|----------------------|----------------------|----------------------|
| AMIGO          | Win(ML32), Lin(ML64) | Win(ML32), Lin(ML64) | Win(ML32), Lin(ML64) |
| C              | Win(MCR), Lin(MCR)   | Win(MCR), Lin(MCR)   | Win(MCR), Lin(MCR)   |
| COPASI         | Win, Lin, OSX        | Win, Lin, OSX        | Win, Lin, OSX        |
| Matlab         | Win(ML32), Lin(ML64) | Win(ML32), Lin(ML64) | Win(ML32), Lin(ML64) |
| SBML           | Win, Lin, OSX        | Win, Lin, OSX        | Win, Lin, OSX        |
| Implementation | B4                   | B5                   | B6                   |
| AMIGO          | Win(ML32), Lin(ML64) | Win(ML32), Lin(ML64) | Lin(ML32,ML64)       |
| C              | Win(MCR), Lin(MCR)   | Win(MCR), Lin(MCR)   | Lin(MCR)             |
| COPASI         | Win, Lin, OSX        | -                    | -                    |
| Matlab         | Win(ML32), Lin(ML64) | Win(ML32), Lin(ML64) | Lin(ML32,ML64)       |
| SBML           | Win, Lin, OSX        | Win, Lin, OSX        | -                    |

Abbreviations used in the table:

Win: Windows; tested with Windows 7 64-Bit

Lin: Linux; tested with openSUSE 64-Bit

OSX: Mac OSX

ML32: Matlab 32-Bit version, tested with Matlab R2011 32-Bit for Windows

ML64: Matlab 64-Bit version, tested with Matlab R2008a 64-Bit for Linux

MCR: Matlab Compiler Runtime, available at <http://www.mathworks.es/products/compiler/mcr/>

Additional notes:

- Matlab Optimization Toolbox might be needed for certain local solvers.
- C implementations: see further details in the corresponding README files regarding further requirements, installation and compilation instructions.

Table S2. Benchmark B1: File list

| Folder | Subfolder            | FILES                                                                                                                |
|--------|----------------------|----------------------------------------------------------------------------------------------------------------------|
| AMIGO  |                      | b1_amigo.m<br>pnom.mat<br>README_AMIGO_B1.txt                                                                        |
| C      |                      | b1_fullC_template.c<br>compile_c.bat<br>fullC_data.mat<br>Makefile<br>nominalpars.h<br>README_C_B1.txt               |
| COPASI |                      | b1.cps<br>README_COPASI_B1.txt<br>yeast_exp.csv<br>yeast_param.csv                                                   |
| Matlab |                      | b1.m<br>b1_obj.m<br>b1_test.m<br>cvodesg_b1.mexa64<br>cvodesg_b1.mexw32<br>README_MATLAB_B1.txt                      |
|        | dynamics_in_Matlab   | b1_dyn_p.m<br>README_MATLAB_DYNAMICS.txt                                                                             |
|        | example_optimization | b1_bounds.mat<br>b1_obj.m<br>b1_PE.m<br>cvodesg_b1.mexa64<br>cvodesg_b1.mexw32<br>README_MATLAB_OPTIM_EXAMPLE_B1.txt |
| SBML   |                      | b1.xml<br>README_SBML.txt                                                                                            |

Table S3. Benchmark B2: File list

| Folder | Subfolder            | FILES                                                                                                                                            |
|--------|----------------------|--------------------------------------------------------------------------------------------------------------------------------------------------|
| AMIGO  |                      | b2_amigo.m<br>pbest.mat<br>README_AMIGO_B2.txt                                                                                                   |
| C      |                      | b2_fullC_template.c<br>compile_c.bat<br>fullC_data.mat<br>Makefile<br>nominalpars.h<br>README_C_B2.txt                                           |
| COPASI |                      | b2.cps<br>chass_exp_1.csv<br>chass_exp_2.csv<br>chass_exp_3.csv<br>chass_exp_4.csv<br>chass_exp_5.csv<br>chass_param.csv<br>README_COPASI_B2.txt |
| Matlab |                      | b2.m<br>b2_obj.m<br>b2_pars.m<br>b2_test.m<br>radau5g_b2.mexa64<br>radau5g_b2.mexw32<br>README_MATLAB_B2.txt                                     |
|        | dynamics_in_Matlab   | b2_dyn_p.m<br>README_MATLAB_DYNAMICS.txt                                                                                                         |
|        | example_optimization | b2_bounds.mat<br>b2_obj.m<br>b2_PE.m<br>radau5g_b2.mexa64<br>radau5g_b2.mexw32<br>README_MATLAB_OPTIM_EXAMPLE_B2.txt                             |
| SBML   |                      | b2.xml<br>README_SBML.txt                                                                                                                        |

Table S4. Benchmark B3: File list

| Folder | Subfolder            | FILES                                                                                                                                                   |
|--------|----------------------|---------------------------------------------------------------------------------------------------------------------------------------------------------|
| AMIGO  |                      | b3_amigo.m<br>b3_data.mat<br>b3_dynamics.m<br>b3_initial.m<br>b3_mex.mexa64<br>b3_mex.mexw32<br>pnom.mat<br>README_AMIGO_B3.txt                         |
| C      |                      | b3_fullC.template.c<br>compile_c.bat<br>fullC_data.mat<br>Makefile<br>nominalpars.h<br>README_C_B3.txt                                                  |
| COPASI |                      | b3.cps<br>README_COPASI_B3.txt<br>xnom.csv                                                                                                              |
| Matlab |                      | b3.m<br>b3_data.mat<br>b3_dyn.m<br>b3_initial.m<br>b3_mex.mexa64<br>b3_mex.mexw32<br>b3_obj.m<br>b3_test.m<br>README_MATLAB_B3.txt                      |
|        | dynamics_in_Matlab   | b3_dyn_p.m<br>README_MATLAB_DYNAMICS.txt                                                                                                                |
|        | example_optimization | b3_bounds.mat<br>b3_data.mat<br>b3_dyn.m<br>b3_initial.m<br>b3_mex.mexa64<br>b3_mex.mexw32<br>b3_obj.m<br>b3_PE.m<br>README_MATLAB_OPTIM_EXAMPLE_B3.txt |
| SBML   |                      | b3.xml<br>README_SBML.txt                                                                                                                               |

Table S5. Benchmark B4: File list

| Folder | Subfolder            | FILES                                                                                                                        |
|--------|----------------------|------------------------------------------------------------------------------------------------------------------------------|
| AMIGO  |                      | b4_amigo.m<br>b3_bounds.mat<br>pnom.mat<br>README_AMIGO_B4.txt                                                               |
| C      |                      | b4_fullC_template.c<br>compile_c.bat<br>fullC_data.mat<br>Makefile<br>nominalpars.h<br>README_C_B4.txt                       |
| COPASI |                      | b4.cps<br>b4.csv<br>README_COPASI_B4.txt                                                                                     |
| Matlab |                      | b4.m<br>b4_obj.m<br>b4_test.m<br>radau5g_b4_mex.mexa64<br>radau5g_b4_mex.mexw32<br>README_MATLAB_B4.txt                      |
|        | dynamics_in_Matlab   | b4_dyn_p.m<br>README_MATLAB_DYNAMICS.txt                                                                                     |
|        | example_optimization | b4_bounds.mat<br>b4_obj.m<br>b4_PE.m<br>radau5g_b4_mex.mexa64<br>radau5g_b4_mex.mexw32<br>README_MATLAB_OPTIM_EXAMPLE_B4.txt |
| SBML   |                      | b4.xml<br>README_SBML.txt                                                                                                    |



Table S6. Benchmark B5: File list

| Folder    | Subfolder            | FILES                                                                                                                               |
|-----------|----------------------|-------------------------------------------------------------------------------------------------------------------------------------|
| AMIGO     |                      | b5_amigo.m<br>logic.c<br>pnom.mat<br>README_AMIGO_B5.txt                                                                            |
| C         |                      | b5_fullC_template.c<br>compile_c.bat<br>fullC_data.mat<br>Makefile<br>nominalpars.h<br>README_C_B5.txt                              |
| Matlab    |                      | b5_data.mat<br>b5_obj.m<br>b5_test.m<br>cvodesg_b5.mexa64<br>cvodesg_b5.mexw32<br>README_MATLAB_B5.txt                              |
|           | example_optimization | b5_bounds.mat<br>b5_data.mat<br>b5_obj.m<br>b5_PE.m<br>cvodesg_b5.mexa64<br>cvodesg_b5.mexw32<br>README_MATLAB_OPTIM_EXAMPLE_B5.txt |
| SBML-qual |                      | B5.xml<br>README_SBML-qual.txt                                                                                                      |

Table S7. Benchmark B6: File list

| Folder | Subfolder            | FILES                                                                                                                                                                    |
|--------|----------------------|--------------------------------------------------------------------------------------------------------------------------------------------------------------------------|
| AMIGO  |                      | b6.mexa64<br>b6.mexglx<br>b6_amigo.m<br>b6_obj.m<br>dm_hkgn53_wls_5_003<br>pbest.mat<br>README_AMIGO_B6.txt                                                              |
| C      |                      | dm_hkgn53_wls_5_003<br>ggn<br>ggn.c<br>ggn.h<br>ggn.o<br>Makefile<br>README.txt                                                                                          |
|        | fly                  | ...                                                                                                                                                                      |
|        | lib32                | ...                                                                                                                                                                      |
|        | lib64                | ...                                                                                                                                                                      |
|        | selected             | ...                                                                                                                                                                      |
|        | util                 | ...                                                                                                                                                                      |
| Matlab |                      | b6.mexa64<br>b6.mexglx<br>b6_dyn.m<br>b6_obj.m<br>b6_test.m<br>callunfold.m<br>dm_hkgn53_wls_5_003<br>README_MATLAB_B6.txt<br>setParameters<br>setParameters.m<br>unfold |
|        | example_optimization | b6.mexa64<br>b6.mexglx<br>b6_bounds.mat<br>b6_obj.m<br>b6_PE.m<br>dm_hkgn53_wls_5_003<br>README_MATLAB_OPTIM_EXAMPLE_B6.txt                                              |

List of files provided with the B6 benchmark. NOTE: additional files included in the auxiliary folders (fly, lib32, lib64, selected, util) are not listed here.

## 2 Requirements, installation, and instructions

### 2.1 COPASI

Download the COPASI software from <http://copasi.org/tiki-index.php?page=download>. We strongly recommend using the latest version. The benchmarks presented here have been tested with COPASI version 4.13 (Build 87). Note that using older versions may cause errors with some benchmarks.

Installation instructions: follow the instructions in:

<http://copasi.org/tiki-index.php?page=Installation&structure=DocumentationNew>.

Test the installation with the examples included in the COPASI distribution. Then test the benchmark models, e.g. B4:

1. Open the b4.cps file, either by double-clicking on it (which will automatically start COPASI) or by launching COPASI and going to the File→Open... tab.
2. Now the model is loaded in COPASI. You can browse the model details on the left side of the COPASI screen, in the “Model” menu. The different tasks are in the “Tasks” menu.
3. Run the “Time Course” task, which should result in an output like the one shown in Figure S1 (to view the plot, choose “Concentrations, Volumes, and Global Quantity Values” in the Output Assistant).

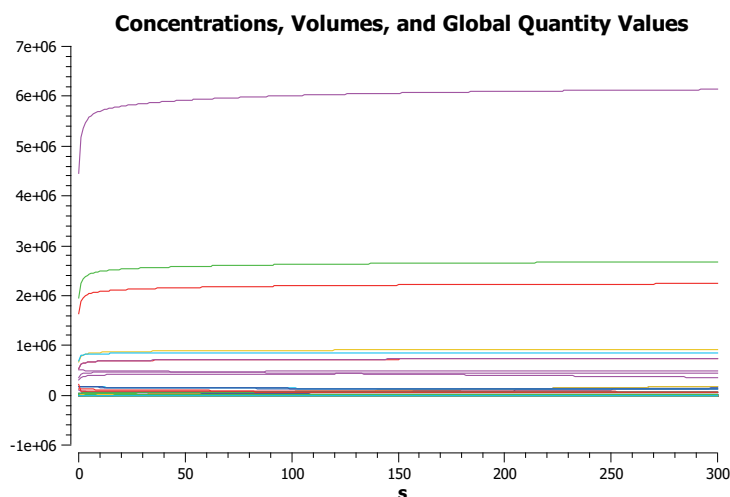

**Figure S1. Benchmark 4. Copasi: time course.** Plot of the result of the Time Course task in COPASI, with default settings.

To perform parameter estimation in COPASI, follow these steps:

1. Open the b\*.cps file, either by double-clicking on it (which will automatically start COPASI) or by launching COPASI and going to the File→Open... tab.
2. Now the model is loaded in COPASI. You can browse the model details on the left side of the COPASI screen, in the “Model” menu. The different tasks are in the “Tasks” menu.

3. To perform parameter estimation, go to Tasks→Parameter Estimation.
4. Note that the model parameters have, by default, the nominal values. While this is fine for simulation purposes, in a typical parameter estimation benchmark problem the start values for the parameters (or “guesses”) must be different from the nominal ones. Usually one would like the initial values to be random guesses taken from within reasonable bounds. To do this, check the “Randomize Start Values” box at the upper left part of the Parameter Estimation screen (just below the “Parameter Estimation” title in bold font). *This should be done for benchmarks B1, B3, and B4.* Note that benchmark B2 is an exception because it uses real data; in this case the nominal parameter values are the starting point of the optimization, and the goal of benchmark B2 is to find a parameter vector that improves the fit obtained by the nominal vector.
5. Before you can execute a parameter estimation task you need to specify the dataset which COPASI will use to fit the parameters you have specified. To choose an objective function, click on the “Experimental Data” button on the upper right corner of the screen, and select a weight method. Information about the different weight schemes is given in the following page of the COPASI manual: <http://www.copasi.org/tiki-index.php?page=0D.Experimental.Data&structure=0D>. Note that COPASI scales the weights so that for each experiment the maximal occurring weight is 1, which makes the definition of the objective functions different from the ones used in other formats.
6. Click the “Output Assistant” button in the lower right corner. This will open a window where you can select the type of plot(s) that will be generated to show the parameter estimation results.
7. Select the optimization method in the “Method” section (lower half of the screen), and change its default settings if desired.
8. Finally, click the “Run” button at the bottom of the screen to start the optimization.

## 2.2 Matlab

You will need Matlab R2008 or newer. If you want to use the pre-compiled mex-files provided, you will need to use either a 32 bit version (in Windows 7) or a 64 bit version (in Linux). Note that the 32 bit requirement applies to the Matlab version, not to the operating system (you can use 32 bit Matlab in a 64 bit OS).

The Matlab implementation includes a number of files. While the files list may vary slightly from one benchmark to the other, the core files are:

- `b*_test.m` carries out a test integration.
- `b*.m` returns the system derivatives ( $dx/dt$ ) for a particular parameter vector ( $p$ ), states vector ( $x$ ), and time instant ( $t$ ). If no parameter or states vector is provided, it returns the nominal values of the parameters and the initial conditions for the states.
- `b*_obj.m` calculates the objective function used in the optimizations for a particular parameter vector. This function returns three outputs: the objective function itself, the constraints, and the residuals.
- `b*_dyn.m` integrates the system dynamics for a particular parameter vector, and returns the system outputs that will be used in the calculation of the objective function.

Before using the models in an optimization it is advisable to test that there are no compatibility issues with the files and that the results are reproducible. For the Matlab implementations—which can be used alone or in combination with the AMIGO toolbox—test files are provided, named `b*_test.m` (`b1_test.m`, `b2_test.m`, ...). The Matlab implementation can be tested simply by running:

```
>> b*_test
```

This script, `b*_test.m`, integrates the `b*` model with nominal parameter values, calculates the objective function, and displays its value.

The Matlab scripts allow the user to set up a customized parameter estimation with any method implemented in Matlab. By selecting `b*_obj.m` as the objective function, new optimization methods can be tested and their results can be benchmarked against those obtained with AMIGO.

### 2.2.1 Pre-compiled (fixed) vs. editable dynamics in the Matlab implementations

For every benchmark the model dynamics are provided in pre-compiled mex-files (with extension `.mexa64` for Linux 64 bit, `.mexw32` for Windows 32 bit). These implementations are computationally faster than the standard Matlab code, hence their use is recommended.

Additionally, for benchmarks B1–B4 the complete dynamics are also provided in Matlab code, as m-files named “`b*_dyn_p.m`” included in a subfolder of the root Matlab folder named “`dynamics_in_Matlab`”. They can be used for inspecting and changing the systems equations (only for advanced users). If you wish to do so, you must replace in the `b*_obj.m` files the calls to the mex-files by appropriate calls to the m-files.

**Table S8. Mex-file implementations provided for use Matlab/AMIGO**

|               | B1 | B2 | B3 | B4 | B5 | B6 |
|---------------|----|----|----|----|----|----|
| Linux 64 bit  | *  | *  | *  | *  | *  | *  |
| Linux 32 bit  | –  | –  | –  | –  | –  | *  |
| Matlab 32 bit | *  | *  | *  | *  | *  | –  |

## 2.3 AMIGO

You will need Matlab R2008 or newer.

The latest version of AMIGO can be downloaded freely for non-commercial use from the CSIC webpage. However, please note that a specific version of AMIGO is provided with this collection of benchmarks, which contains some adjustments not available in other released versions. To avoid compatibility issues, **the AMIGO implementations of the benchmark problems should be used with the version of AMIGO provided with this benchmark, AMIGO2014bench**. This AMIGO version can be downloaded from <https://sites.google.com/site/biopredynbenchmarks/download>. Alternatively, it is also supplied as Additional Files 4 and 5 in the original publication, available at the BMC Systems Biology webpage. However, please note that the above link contains the most up-to-date version.

Installation instructions:

1. Unzip the `.zip` archive in your computer. **IMPORTANT:** to avoid errors, store the AMIGO folder in a directory without spaces (i.e., avoid routes such as `C: Program Files AMIGO`. Instead, use e.g. `C: AMIGO`)
2. Start a Matlab session and go to the AMIGO folder
3. Type:
 

```
>> AMIGO.Startup
```

 every time you want to use the AMIGO toolbox

Please make sure AMIGO is properly installed (e.g. by running some of the examples included in the Appendix of AMIGO's user guide) before attempting to run the benchmark problems described here.

The AMIGO implementation of the benchmarks consists of a main file called `b*_amigo.m` and, in some cases, of some additional files. Using the AMIGO implementation is straightforward:

1. Copy the file(s) in the AMIGO folder
2. Start a Matlab session and go to the AMIGO folder
3. Initialize the AMIGO toolbox: run the script  
`>> AMIGO_Startup`
4. Prepare the model: run  
`>> AMIGO_Prep('b*_amigo')`  
 This step only has to be performed the first time the model is used
5. Start an optimization: run  
`>> AMIGO_PE('b*_amigo')`  
 This will carry out a parameter estimation task using the default options in AMIGO. If you want to customize the optimization, edit the corresponding options before this step. For example, if you are using `ess` as the optimization method for parameter estimation (default), the options can be changed in the following file: `Kernel/Opt_solvers/ess_options_defaults`

To test the benchmarks, load and run benchmark B4 following the steps above. In the `ess_options_defaults` file, set:

```
opts.maxtime=3600;
opts.local.solver='fmincon';
opts.local.finish='fmincon';
```

This should result in a fit similar to the one shown on Figure S10 in this document.

Parameter estimation is just one of the tasks that can be carried out in AMIGO. The implementation provided can also be used for model simulation (`AMIGO_SModel`, `AMIGO_SObs`, `AMIGO_SData`), identifiability analysis (`AMIGO_LRank`), etc. To do this, replace the `AMIGO_PE` in step (5) with the corresponding method. Please note that, depending on the task, you may want to modify the parameter values too: in most cases, benchmark files are provided by default with random guesses for the parameter values; but to carry out e.g. local ranking of the parameters with `LRank`, the nominal (or an optimal) parameter vector should be used. This can be done by changing the values of `inputs.model.par` and `inputs.PEsol.global.theta_guess` in the AMIGO files.

## 2.4 C

Each C directory contains the following files:

- `b*_fullC_template.c` is a file that contains examples for some simple tasks that you can do using the benchmark, e.g. evaluate a parameter vector
- `fullC_data.mat` is a Matlab file containing the experimental design and data
- `compile_c.bat` is a Windows batch script with the GCC command to compile the C implementations
- `Makefile` is used for compiling the template file in Linux
- `nominalpars.h` is a header file that contains the nominal (or best known) parameter values
- `README_C_*.txt` contains instructions

Note that, due to the particularities of being a spatial model, the implementation of **benchmark B6** has some differences with that of the other benchmarks. If you wish to use the C implementation of B6, please refer to the detailed instructions provided in the corresponding README file. For benchmarks B1–B5, refer to the instructions provided in the subsections below (which can also be found in the corresponding README files).

#### 2.4.1 Requirements and installation instructions for Windows

Requirements for Windows (32-bit and 64-bit):

- A 32-bit installation of Matlab or Matlab Compiler Runtime (MCR) is needed. MCR is available at <http://www.mathworks.es/products/compiler/mcr/>. Note that you can run the 32-bits libraries even if you have the 64-bit version of Windows
- GCC compiler; this distribution has been tested with the minGW version shipped with RTools: <http://cran.r-project.org/bin/windows/Rtools/> (tested with Rtools version 3.1.0.1939 and gcc-4.6.3)
- a specific version of AMIGO (AMIGO2014bench) must be used with this collection of benchmarks. This AMIGO version can be downloaded from <https://sites.google.com/site/biopredynbenchmarks/download>. Alternatively, it is also supplied as Additional Files 4 and 5 in the original publication, available at the BMC Systems Biology webpage. However, please note that the above link contains the most up-to-data version.

How to compile and run benchmarks B1–B5:

1. A compiled version of the libAMIGO library is needed. For Windows 32 bits the library is included in the AMIGO distribution, under:  
 AMIGO2014bench/Kernel/libAMIGO/lib\_win32/vs  
 On Windows, the libAMIGO library should be on the system path, e.g.:  
 C:/Desktop/AMIGO2014bench/Kernel/libAMIGO/lib\_win32/vs  
 How do I set my system path under Windows?  
<http://www.mathworks.es/support/solutions/en/data/1-15ZLK/>
2. Set the location of your Matlab installation in the first lines of the compile.c.bat file. Two different examples:
  - a) A Matlab compiler installation  
 set "MATLAB\_PATH=C:/Program Files (x86)/MATLAB/MATLAB Compiler Runtime/v82"
  - b) A MatlabR2011b version installed under C:/MATLAB  
 set "MATLAB\_PATH=C:/MATLAB/R2011b"
3. Set the location of your Matlab libraries:  
 set "MATLAB\_LIB=%MATLAB\_PATH%/bin/win32"
4. Set the location of you AMIGO installation directory, e.g.:  
 set "AMIGO\_PATH=.../.../AMIGO2014bench"
5. Run the script compile.c.bat file in the Windows command line
6. Run the binary, e.g.: B1

## 2.4.2 Requirements and installation instructions for Linux and macOSx

Requirements for Linux (32-bit and 64-bit):

- An installation of Matlab or Matlab Compiler Runtime (MCR) is needed. MCR is available at <http://www.mathworks.es/products/compiler/mcr/>. Choose the MCR version appropriate for your machine(32-bit or 64-bit)
- GCC compiler; this distribution has been tested with the minGW version shipped with RTools: <http://cran.r-project.org/bin/windows/Rtools/> (tested with Rtools version 3.1.0.1939 and gcc-4.6.3)
- a specific version of AMIGO (AMIGO2014bench) must be used with this collection of benchmarks. This AMIGO version can be downloaded from <https://sites.google.com/site/biopredynbenchmarks/download>. Alternatively, it is also supplied as Additional Files 4 and 5 in the original publication, available at the BMC Systems Biology webpage. However, please note that the above link contains the most up-to-data version.

How to compile and run benchmarks B1–B5:

1. Make sure you have Matlab or Matlab compiler runtime installed  
(available at <http://www.mathworks.es/products/compiler/mcr/>)
2. Move into the the AMIGO directory:  
AMIGO2014bench
3. Execute the following steps (you can copy and paste after editing the paths):  
#This path requires edition. Introduce the location of your matlab installation.  
export MATLAB\_PATH=/usr/local/matlab  
  
#If you have a 32 bits matlab installation choose glnx86 otherwise choose glnx64  
#export MATLAB\_LIB=\$MATLAB\_PATH/bin/glnxa64  
export MATLAB\_LIB=\$MATLAB\_PATH/bin/glnx86  
  
#Change the AMIGO PATH to match the location of your AMIGO installation  
export AMIGO\_PATH=\$(pwd)  
  
Alternatively, you can modify the Makefile in order not to depend on the environment variables
4. Execute the compile.libAMIGO.sh script to compile the libAMIGO library. Make sure you have execution permission:  
chmod +x compile.libAMIGO.sh  
./compile.libAMIGO.sh
5. Move to the C folder of the corresponding benchmark
6. Compile the the benchmark:  
make clean  
make
7. Execute the binary,e.g.:  
./B1



### 2.4.3 Brief overview of the template file

In the `b*_fullC_template.c` file we provide the example code to perform a number of tasks:

1. How to evaluate an objective function, `how_to_evaluate(AMIGO_problem* amigo_problem)`  
 We show the objective function value obtained with the nominal parameter vector (or with a good guess), and how to generate a new parameter vector and evaluate it
2. Implement your own objective function, `objective_function(double* x, void* data)`  
 The objective function used in the previous example is the the squared difference between the data and the model simulation scaled by a factor, which in this case corresponds to the inverse of the expected experimental error. It is possible to use a different objective function if you prefer. To this end, we illustrate how the computations are done in the function:  
`how_to_create_a_new_objective_function(AMIGO_problem* amigo_problem)`. By modifying it, an alternative objective function can be defined
3. Call an optimization algorithm, `random_search(AMIGO_problem* amigo_problem)`  
 Each optimization solve in C is called in a specific way. However, it is common to provide an objective function that receives an array (`double*`) of values and a pointer that allows you to specify the location of some ad hoc data. To illustrate how an optimization algorithm can be configured, we provide a (pseudo) optimization algorithm, i.e. a random search, where parameter solutions are randomly generated and evaluated. Please not that random search is NOT a recommended optimization method, and it is provided here solely for demonstration purposes.

### 2.4.4 Brief Note on Compiler Versions

Minor differences related with numerical precision might arise depending on the the used compiler and optimization flags. On Windows we have tested the fullC benchmarks with `gcc-4.6.3`. The library `libAMIGO` provided for Windows 32-bits (note that it can be executed in a 64-bit OS) was compiled with Visual Studio 2010.

On Linux we have tested the fullC benchmarks with `gcc-4.3.1` (64-bits).

### 3 Testing reproducibility

IMPORTANT: please note that, due to the use of different compilers, compiler options, platforms, and/or execution types, there may be small differences in the integrations, which will originate different objective function values. Some results are included in Table S10 below. The tolerances used for integrating the models in Matlab (with or without AMIGO) are shown in Table S9.

**Table S9. Integrator tolerances set in Matlab for the different benchmarks**

|                    | B1        | B2        | B3        | B4        | B5        | B6        |
|--------------------|-----------|-----------|-----------|-----------|-----------|-----------|
| Relative tolerance | $10^{-4}$ | $10^{-4}$ | $10^{-6}$ | $10^{-6}$ | $10^{-6}$ | $10^{-6}$ |
| Absolute tolerance | $10^{-6}$ | $10^{-6}$ | $10^{-6}$ | $10^{-6}$ | $10^{-3}$ | $10^{-6}$ |

**Table S10. Differences in objective function values with different solvers**

| Model | Compiler | Opt. Flag | solver | execution | Matlab | LLK           |
|-------|----------|-----------|--------|-----------|--------|---------------|
| B1    | VS       | /Od       | cvodes | standard  | PCWIN  | 7.8177420E+05 |
| B1    | VS       | /Od       | cvodes | costMex   | PCWIN  | 7.8177420E+05 |
| B1    | VS       | /O1       | cvodes | standard  | PCWIN  | 7.8177420E+05 |
| B1    | VS       | /O1       | cvodes | costMex   | PCWIN  | 7.8177420E+05 |
| B1    | VS       | /O2       | cvodes | standard  | PCWIN  | 7.8177420E+05 |
| B1    | VS       | /O2       | cvodes | costMex   | PCWIN  | 7.8177420E+05 |
| B1    | VS       | /Ox       | cvodes | standard  | PCWIN  | 7.8177420E+05 |
| B1    | VS       | /Ox       | cvodes | costMex   | PCWIN  | 7.8177420E+05 |
| B1    | gcc      | O0        | cvodes | standard  | PCWIN  | 1.6011050E+06 |
| B1    | gcc      | O0        | cvodes | costMex   | PCWIN  | 1.7985910E+06 |
| B1    | gcc      | O1        | cvodes | standard  | PCWIN  | 1.0493670E+06 |
| B1    | gcc      | O1        | cvodes | costMex   | PCWIN  | 9.7428280E+05 |
| B1    | gcc      | O2        | cvodes | standard  | PCWIN  | 1.0493670E+06 |
| B1    | gcc      | O2        | cvodes | costMex   | PCWIN  | 9.7428280E+05 |
| B1    | gcc      | O3        | cvodes | standard  | PCWIN  | 1.0493670E+06 |
| B1    | gcc      | O3        | cvodes | costMex   | PCWIN  | 9.7428280E+05 |
| B1    | gcc      | O0        | cvodes | fullC     | PCWIN  | 4.9725670E+05 |
| B1    | gcc      | O1        | cvodes | fullC     | PCWIN  | 1.6641370E+06 |
| B1    | gcc      | O2        | cvodes | fullC     | PCWIN  | 3.8916910E+05 |
| B1    | gcc      | O3        | cvodes | fullC     | PCWIN  | 3.8916910E+05 |
| B1    | gcc      |           | cvodes | standard  | GLXA64 | 1.0845720E+06 |
| B1    | gcc      |           | cvodes | costMex   | GLXA64 | 1.0845720E+06 |
| B1    | gcc      |           | cvodes | MATLAB    | GLXA64 | 1.0857000E+06 |
| B1    | gcc      |           | cvodes | standard  | GLNX86 | 6.5381130E+05 |
| B1    | gcc      |           | cvodes | costMex   | GLNX86 | 6.5381130E+05 |
| B1    | gcc      |           | cvodes | MATLAB    | GLNX86 | 6.5498000E+05 |
| B1    | gcc      |           | cvodes | fullC     | GLXA64 | 1.0845720E+06 |
| B1    | gcc      |           | cvodes | fullC     | GLNX86 |               |
| B2    | NA       | NA        | ode15s | standard  | PCWIN  | 3.2451160E+04 |
| B2    | g95      | O0        | radau5 | standard  | PCWIN  | 3.1096170E+04 |
| B2    | NA       | NA        | cvodes | MATLAB    | PCWIN  | 3.1136000E+04 |
| B2    | VS       | /Od       | cvodes | standard  | PCWIN  | 3.1138130E+04 |
| B2    | VS       | /Od       | cvodes | costMex   | PCWIN  | 3.1138130E+00 |
| B2    | g95      | O1        | radau5 | standard  | PCWIN  | 3.1096170E+04 |
| B2    | VS       | /O1       | cvodes | standard  | PCWIN  | 3.1138130E+04 |

|    |     |     |        |          |        |               |
|----|-----|-----|--------|----------|--------|---------------|
| B2 | VS  | /O1 | cvodes | costMex  | PCWIN  | 3.1138130E+04 |
| B2 | g95 | O2  | radau5 | standard | PCWIN  | 3.1096170E+04 |
| B2 | VS  | /O2 | cvodes | standard | PCWIN  | 3.1138130E+04 |
| B2 | VS  | /O2 | cvodes | costMex  | PCWIN  | 3.1138130E+04 |
| B1 | g95 | O3  | radau5 | standard | PCWIN  | 3.1096170E+04 |
| B2 | VS  | /Ox | cvodes | standard | PCWIN  | 3.1138130E+04 |
| B2 | VS  | /Ox | cvodes | costMex  | PCWIN  | 3.1138130E+04 |
| B2 | gcc | O0  | cvodes | standard | PCWIN  | 3.1138130E+04 |
| B2 | gcc | O0  | cvodes | costMex  | PCWIN  | 3.1138130E+00 |
| B2 | gcc | O1  | cvodes | standard | PCWIN  | 3.1138130E+04 |
| B2 | gcc | O1  | cvodes | costMex  | PCWIN  | 3.1138130E+04 |
| B2 | gcc | O2  | cvodes | standard | PCWIN  | 3.1138130E+04 |
| B2 | gcc | O2  | cvodes | costMex  | PCWIN  | 3.1138130E+04 |
| B2 | gcc | O3  | cvodes | standard | PCWIN  | 3.1138130E+04 |
| B2 | gcc | O3  | cvodes | costMex  | PCWIN  | 3.1138130E+04 |
| B2 | gcc | O0  | cvodes | fullC    | PCWIN  | 3.1132610E+04 |
| B2 | gcc | O1  | cvodes | fullC    | PCWIN  | 3.1132610E+04 |
| B2 | gcc | O2  | cvodes | fullC    | PCWIN  | 3.1132610E+04 |
| B2 | gcc | O3  | cvodes | fullC    | PCWIN  | 3.1132610E+04 |
| B2 | gcc |     | cvodes | standard | GLXA64 | 3.1138130E+04 |
| B2 | gcc |     | cvodes | costMex  | GLXA64 | 3.1138130E+04 |
| B2 | gcc |     | cvodes | MATLAB   | GLXA64 | 3.1136000E+04 |
| B2 | g95 |     | radau5 | standard | GLXA64 | 3.1096170E+04 |
| B2 | gcc |     | cvodes | standard | GLNX86 | 3.1138130E+04 |
| B2 | gcc |     | cvodes | costMex  | GLNX86 | 3.1138130E+04 |
| B2 | gcc |     | cvodes | MATLAB   | GLNX86 | 3.1136000E+04 |
| B2 | g95 |     | radau5 | standard | GLNX86 | 3.1096170E+04 |
| B2 | gcc |     | cvodes | fullC    | GLXA64 | 3.1132610E+04 |
| B2 | gcc |     | cvodes | fullC    | GLXA86 | 3.1132610E+04 |
| B3 | NA  | NA  | cvodes | MATLAB   | PCWIN  | 4.9778000E-05 |
| B3 | VS  | /Od | cvodes | costMex  | PCWIN  | 2.5644680E-05 |
| B3 | VS  | /O1 | cvodes | costMex  | PCWIN  | 2.5644680E-05 |
| B3 | VS  | /O2 | cvodes | costMex  | PCWIN  | 2.5644680E-05 |
| B3 | VS  | /Ox | cvodes | costMex  | PCWIN  | 2.5644680E-05 |
| B3 | gcc | O0  | cvodes | costMex  | PCWIN  | 2.8044740E-05 |
| B3 | gcc | O1  | cvodes | costMex  | PCWIN  | 2.8044740E-05 |
| B3 | gcc | O2  | cvodes | costMex  | PCWIN  | 2.8044740E-05 |
| B3 | gcc | O3  | cvodes | costMex  | PCWIN  | 2.8044740E-05 |
| B3 | gcc | O0  | cvodes | fullc    | PCWIN  | 3.9159330E-05 |
| B3 | gcc | O1  | cvodes | fullc    | PCWIN  | 4.9993660E-05 |
| B3 | gcc | O2  | cvodes | fullc    | PCWIN  | 3.7396250E-05 |
| B3 | gcc | O3  | cvodes | fullc    | PCWIN  | 3.7396250E-05 |
| B3 | gcc |     | cvodes | costMex  | GLXA64 | 2.7314070E-05 |
| B3 | gcc |     | cvodes | MATLAB   | GLXA64 | 0.0000000E+00 |
| B3 | gcc |     | cvodes | costMex  | GLNX86 | 2.9083310E-05 |
| B3 | gcc |     | cvodes | fullC    | GLXA64 | 5.7404440E-05 |
| B3 | gcc |     | cvodes | fullC    | GLNX86 | 5.1935180E-05 |
| B4 | NA  | NA  | ode15s | standard | PCWIN  | 3.9066890E+01 |
| B4 | NA  | NA  | radau5 | MATLAB   | PCWIN  | 3.9067350E+01 |
| B4 | g95 | O0  | radau5 | standard | PCWIN  | 3.9066950E+01 |
| B4 | VS  | /Od | cvodes | standard | PCWIN  | 3.9071020E+01 |
| B4 | VS  | /Od | cvodes | costMex  | PCWIN  | 3.9071020E+01 |
| B4 | g95 | O1  | radau5 | standard | PCWIN  | 3.9067350E+01 |
| B4 | VS  | /O1 | cvodes | standard | PCWIN  | 3.9071020E+01 |

|    |     |     |        |          |        |               |
|----|-----|-----|--------|----------|--------|---------------|
| B4 | VS  | /O1 | cvodes | costMex  | PCWIN  | 3.9071020E+01 |
| B4 | g95 | O1  | radau5 | standard | PCWIN  | 3.9066950E+01 |
| B4 | VS  | /O1 | cvodes | standard | PCWIN  | 3.9071020E+01 |
| B4 | VS  | /O1 | cvodes | costMex  | PCWIN  | 3.9071020E+01 |
| B4 | g95 | O3  | radau5 | standard | PCWIN  | 3.9066950E+01 |
| B4 | VS  | /Ox | cvodes | standard | PCWIN  | 3.9071020E+01 |
| B4 | VS  | /Ox | cvodes | costMex  | PCWIN  | 3.9071020E+01 |
| B4 | gcc | O0  | cvodes | standard | PCWIN  | 3.9071000E+01 |
| B4 | gcc | O0  | cvodes | costMex  | PCWIN  | 3.9071020E+01 |
| B4 | gcc | O1  | cvodes | standard | PCWIN  | 3.9071000E+01 |
| B4 | gcc | O1  | cvodes | costMex  | PCWIN  | 3.9071020E+01 |
| B4 | gcc | O2  | cvodes | standard | PCWIN  | 3.9071000E+01 |
| B4 | gcc | O2  | cvodes | costMex  | PCWIN  | 3.9071020E+01 |
| B4 | gcc | O3  | cvodes | standard | PCWIN  | 3.9071000E+01 |
| B4 | gcc | O3  | cvodes | costMex  | PCWIN  | 3.9071020E+01 |
| B4 | gcc | O0  | cvodes | fullc    | PCWIN  | 3.9071010E+01 |
| B4 | gcc | O1  | cvodes | fullc    | PCWIN  | 3.9071030E+01 |
| B4 | gcc | O2  | cvodes | fullc    | PCWIN  | 3.9071020E+01 |
| B4 | gcc | O3  | cvodes | fullc    | PCWIN  | 3.9071020E+01 |
| B4 | gcc |     | cvodes | standard | GLXA64 | 3.9071030E+01 |
| B4 | gcc |     | cvodes | costMex  | GLXA64 | 3.9071030E+01 |
| B4 | gcc |     | cvodes | MATLAB   | GLXA64 | 3.9067350E+01 |
| B4 | NA  | NA  | ode15s | MATLAB   | GLXA64 | 3.9066890E+01 |
| B4 | gcc |     | cvodes | standard | GLNX86 | 3.9071030E+01 |
| B4 | gcc |     | cvodes | costMex  | GLNX86 | 3.9071030E+01 |
| B4 | gcc |     | cvodes | MATLAB   | GLNX86 | 3.9067350E+01 |
| B4 | NA  | NA  | ode15s | MATLAB   | GLNX86 | 3.9066890E+01 |
| B4 | g95 |     | radau5 | standard | GLNX86 | 3.9066950E+01 |
| B4 | gcc |     | cvodes | fullC    | GLXA64 | 3.9071030E+01 |
| B4 | gcc |     | cvodes | fullC    | GLNX86 | 3.9071030E+01 |
| B5 | VS  | /Od | cvodes | standard | PCWIN  | 4.2726770E+03 |
| B5 | VS  | /Od | cvodes | costMex  | PCWIN  | 4.2726770E+03 |
| B5 | VS  | /O1 | cvodes | standard | PCWIN  | 4.2726770E+03 |
| B5 | VS  | /O1 | cvodes | costMex  | PCWIN  | 4.2726770E+03 |
| B5 | VS  | /O2 | cvodes | standard | PCWIN  | 4.2726770E+03 |
| B5 | VS  | /O2 | cvodes | costMex  | PCWIN  | 4.2726770E+03 |
| B5 | VS  | /O3 | cvodes | standard | PCWIN  | 4.2726770E+03 |
| B5 | VS  | /O3 | cvodes | costMex  | PCWIN  | 4.2726770E+03 |
| B5 | gcc | O0  | cvodes | standard | PCWIN  | 4.2726770E+03 |
| B5 | gcc | O0  | cvodes | costMex  | PCWIN  | 4.2726770E+03 |
| B5 | gcc | O1  | cvodes | standard | PCWIN  | 4.2726770E+03 |
| B5 | gcc | O1  | cvodes | costMex  | PCWIN  | 4.2726770E+03 |
| B5 | gcc | O2  | cvodes | standard | PCWIN  | 4.2726770E+03 |
| B5 | gcc | O2  | cvodes | costMex  | PCWIN  | 4.2726770E+03 |
| B5 | gcc | O3  | cvodes | standard | PCWIN  | 4.2726770E+03 |
| B5 | gcc | O3  | cvodes | costMex  | PCWIN  | 4.2726770E+03 |
| B5 | gcc | O0  | cvodes | fullc    | PCWIN  | 4.2726770E+03 |
| B5 | gcc | O1  | cvodes | fullc    | PCWIN  | 4.2726770E+03 |
| B5 | gcc | O2  | cvodes | fullc    | PCWIN  | 4.2726770E+03 |
| B5 | gcc | O3  | cvodes | fullc    | PCWIN  | 4.2726770E+03 |
| B5 | gcc |     | cvodes | standard | GLXA64 | 4.2737460E+03 |
| B5 | gcc |     | cvodes | costMex  | GLXA64 | 4.2737460E+03 |
| B5 | gcc |     | cvodes | MATLAB   | GLXA64 | 4.2737000E+03 |
| B5 | gcc |     | cvodes | standard | GLNX86 | 4.2726770E+03 |

|    |     |  |        |         |        |               |
|----|-----|--|--------|---------|--------|---------------|
| B5 | gcc |  | cvodes | costMex | GLNX86 | 4.2726770E+03 |
| B5 | gcc |  | cvodes | fullC   | GLXA64 | 4.2737460E+03 |
| B5 | gcc |  | cvodes | fullC   | GLNX86 | 4.2726770E+03 |

## 4 Models: parameters, outputs, and data

### 4.1 B1: *S. cerevisiae*

Table S11 lists the model parameters and their nominal values. The measurable outputs of model B1 (“observables”) consist of 38 metabolite concentrations (observables 1–38) and 6 fluxes (observables 39–44), which are listed in tables S12 and S13.

**Table S11.** Benchmark 1: parameter values

| Param. name | Param. # | Param. value                     |
|-------------|----------|----------------------------------|
| Vmax_0001   | p1       | 54.1365634735 mM·s <sup>-1</sup> |
| Keq_0001    | p2       | 10.54                            |
| Km0025_0001 | p3       | 0.1 mM                           |
| Km0709_0001 | p4       | 0.1 mM                           |
| Km0710_0001 | p5       | 0.1 mM                           |
| Km1399_0001 | p6       | 0.527 mM                         |
| Vmax_0004   | p7       | 29.8936617862 mM·s <sup>-1</sup> |
| Keq_0004    | p8       | 10.54                            |
| Km0063_0004 | p9       | 0.1 mM                           |
| Km0709_0004 | p10      | 0.1 mM                           |
| Km0710_0004 | p11      | 0.1 mM                           |
| Km1399_0004 | p12      | 0.527 mM                         |
| Vmax_0005   | p13      | 2.192738642 mM·s <sup>-1</sup>   |
| Keq_0005    | p14      | 0.1207708779 mM                  |
| Km1543_0005 | p15      | 0.467 mM                         |
| Km0002_0005 | p16      | 0.1 mM                           |
| Km1538_0005 | p17      | 0.282 mM                         |
| Vmax_0007   | p18      | 0.0865554727 mM·s <sup>-1</sup>  |
| Keq_0007    | p19      | 2                                |
| Km0077_0007 | p20      | 0.1 mM                           |
| Km0312_0007 | p21      | 0.1 mM                           |
| Vmax_0008   | p22      | 0.016859852 mM·s <sup>-1</sup>   |
| Keq_0008    | p23      | 2                                |
| Km0082_0008 | p24      | 0.1 mM                           |
| Km0380_0008 | p25      | 0.1 mM                           |
| Km0529_0008 | p26      | 0.1 mM                           |
| Km1331_0008 | p27      | 0.1 mM                           |
| Vmax_0012   | p28      | 0.3473759638 mM·s <sup>-1</sup>  |
| Keq_0012    | p29      | 11.6114349411                    |
| Km0991_0012 | p30      | 0.298 mM                         |
| Km1203_0012 | p31      | 0.0867 mM                        |
| Km0118_0012 | p32      | 0.1 mM                           |
| Km1198_0012 | p33      | 1.5 mM                           |
| Vmax_0014   | p34      | 0.0017311095 mM·s <sup>-1</sup>  |
| Keq_0014    | p35      | 0.2 mM                           |
| Km0142_0014 | p36      | 0.1 mM                           |
| Km0313_0014 | p37      | 0.1 mM                           |
| Km0419_0014 | p38      | 0.1 mM                           |
| Vmax_0015   | p39      | 0.0024235532 mM·s <sup>-1</sup>  |
| Keq_0015    | p40      | 2                                |
| Km0141_0015 | p41      | 0.1 mM                           |
| Km1212_0015 | p42      | 0.1 mM                           |
| Km0142_0015 | p43      | 0.1 mM                           |

|             |     |                                 |
|-------------|-----|---------------------------------|
| Km1207_0015 | p44 | 0.1 mM                          |
| Vmax_0016   | p45 | 0.4631679518 mM·s <sup>-1</sup> |
| Keq_0016    | p46 | 0.3795066414                    |
| Km0178_0016 | p47 | 0.1 mM                          |
| Km1399_0016 | p48 | 0.527 mM                        |
| Km0039_0016 | p49 | 0.1 mM                          |
| Km0456_0016 | p50 | 0.1 mM                          |
| Vmax_0018   | p51 | 0.643588026 mM·s <sup>-1</sup>  |
| Keq_0018    | p52 | 1.1744966443                    |
| Km0176_0018 | p53 | 0.1 mM                          |
| Km0991_0018 | p54 | 0.298 mM                        |
| Km0180_0018 | p55 | 0.175 mM                        |
| Km0953_0018 | p56 | 0.1 mM                          |
| Vmax_0020   | p57 | 0.6422416075 mM·s <sup>-1</sup> |
| Keq_0020    | p58 | 1.3071895425                    |
| Km0551_0020 | p59 | 0.1 mM                          |
| Km1360_0020 | p60 | 0.153 mM                        |
| Km0349_0020 | p61 | 0.1 mM                          |
| Km1322_0020 | p62 | 0.1 mM                          |
| Vmax_0023   | p63 | 0.2885182424 mM·s <sup>-1</sup> |
| Keq_0023    | p64 | 2                               |
| Km0162_0023 | p65 | 0.1 mM                          |
| Km0165_0023 | p66 | 0.1 mM                          |
| Vmax_0024   | p67 | 0.6732092322 mM·s <sup>-1</sup> |
| Keq_0024    | p68 | 2                               |
| Km0232_0024 | p69 | 0.1 mM                          |
| Km0373_0024 | p70 | 0.1 mM                          |
| Km0162_0024 | p71 | 0.1 mM                          |
| Km0529_0024 | p72 | 0.1 mM                          |
| Vmax_0027   | p73 | 0.2758234397 mM·s <sup>-1</sup> |
| Keq_0027    | p74 | 2                               |
| Km0835_0027 | p75 | 0.1 mM                          |
| Km0454_0027 | p76 | 0.1 mM                          |
| Vmax_0029   | p77 | 0.4808637373 mM·s <sup>-1</sup> |
| Keq_0029    | p78 | 0.2 mM                          |
| Km0010_0029 | p79 | 0.1 mM                          |
| Km0291_0029 | p80 | 0.1 mM                          |
| Km0456_0029 | p81 | 0.1 mM                          |
| Vmax_0032   | p82 | 0.1786889648 mM·s <sup>-1</sup> |
| Keq_0032    | p83 | 0.88 mM                         |
| Km0390_0032 | p84 | 0.1 mM                          |
| Km0423_0032 | p85 | 0.44 mM                         |
| Km1322_0032 | p86 | 0.1 mM                          |
| Vmax_0038   | p87 | 0.0034622189 mM·s <sup>-1</sup> |
| Keq_0038    | p88 | 0.2 mM                          |
| Km0577_0038 | p89 | 0.1 mM                          |
| Km0158_0038 | p90 | 0.1 mM                          |
| Km0722_0038 | p91 | 0.1 mM                          |
| Vmax_0039   | p92 | 0.2752464032 mM·s <sup>-1</sup> |
| Keq_0039    | p93 | 2                               |
| Km0210_0039 | p94 | 0.1 mM                          |
| Km0211_0039 | p95 | 0.1 mM                          |
| Vmax_0040   | p96 | 0.4587440054 mM·s <sup>-1</sup> |
| Keq_0040    | p97 | 0.2 mM                          |

|             |      |                                 |
|-------------|------|---------------------------------|
| Km0349_0040 | p98  | 0.1 mM                          |
| Km0210_0040 | p99  | 0.1 mM                          |
| Km1322_0040 | p100 | 0.1 mM                          |
| Vmax_0041   | p101 | 0.0014504293 mM·s <sup>-1</sup> |
| Keq_0041    | p102 | 2                               |
| Km0231_0041 | p103 | 0.1 mM                          |
| Km1212_0041 | p104 | 0.1 mM                          |
| Km1207_0041 | p105 | 0.1 mM                          |
| Km1445_0041 | p106 | 0.1 mM                          |
| Vmax_0060   | p107 | 0.2885182424 mM·s <sup>-1</sup> |
| Keq_0060    | p108 | 2                               |
| Km0165_0060 | p109 | 0.1 mM                          |
| Km0009_0060 | p110 | 0.1 mM                          |
| Vmax_0061   | p111 | 0.6732092322 mM·s <sup>-1</sup> |
| Keq_0061    | p112 | 0.1156                          |
| Km0009_0061 | p113 | 0.1 mM                          |
| Km1198_0061 | p114 | 1.5 mM                          |
| Km0010_0061 | p115 | 0.1 mM                          |
| Km1203_0061 | p116 | 0.0867 mM                       |
| Vmax_0065   | p117 | 0.6422416075 mM·s <sup>-1</sup> |
| Keq_0065    | p118 | 1.3071895425                    |
| Km0261_0065 | p119 | 0.1 mM                          |
| Km1360_0065 | p120 | 0.153 mM                        |
| Km0324_0065 | p121 | 0.1 mM                          |
| Km1322_0065 | p122 | 0.1 mM                          |
| Vmax_0079   | p123 | 0.9637124801 mM·s <sup>-1</sup> |
| Keq_0079    | p124 | 0.1792167832 mM                 |
| Km0301_0079 | p125 | 0.1 mM                          |
| Km0434_0079 | p126 | 4.29 mM                         |
| Km0999_0079 | p127 | 0.1 mM                          |
| Km0302_0079 | p128 | 0.1 mM                          |
| Km0394_0079 | p129 | 1.29 mM                         |
| Km0991_0079 | p130 | 0.298 mM                        |
| Km1322_0079 | p131 | 0.1 mM                          |
| Vmax_0080   | p132 | 0.1760765283 mM·s <sup>-1</sup> |
| Keq_0080    | p133 | 2                               |
| Km0306_0080 | p134 | 0.1 mM                          |
| Km1212_0080 | p135 | 0.1 mM                          |
| Km0322_0080 | p136 | 0.1 mM                          |
| Km1207_0080 | p137 | 0.1 mM                          |
| Vmax_0091   | p138 | 5.910259852 mM·s <sup>-1</sup>  |
| Keq_0091    | p139 | 2                               |
| Km0335_0091 | p140 | 0.1 mM                          |
| Km0340_0091 | p141 | 0.1 mM                          |
| Vmax_0096   | p142 | 1.3652683229 mM·s <sup>-1</sup> |
| Keq_0096    | p143 | 2                               |
| Km0146_0096 | p144 | 0.1 mM                          |
| Km1212_0096 | p145 | 0.1 mM                          |
| Km0016_0096 | p146 | 0.1 mM                          |
| Km1207_0096 | p147 | 0.1 mM                          |
| Vmax_0097   | p148 | 1.3652683229 mM·s <sup>-1</sup> |
| Keq_0097    | p149 | 0.0720126454                    |
| Km1399_0097 | p150 | 0.527 mM                        |
| Km0146_0097 | p151 | 0.1 mM                          |



|             |      |                                 |
|-------------|------|---------------------------------|
| Km0456_0097 | p152 | 0.1 mM                          |
| Vmax_0103   | p153 | 0.1106755978 mM·s <sup>-1</sup> |
| Keq_0103    | p154 | 2                               |
| Km0373_0103 | p155 | 0.1 mM                          |
| Km0367_0103 | p156 | 0.1 mM                          |
| Km0529_0103 | p157 | 0.1 mM                          |
| Vmax_0108   | p158 | 0.9003803216 mM·s <sup>-1</sup> |
| Keq_0108    | p159 | 0.6013986014                    |
| Km0373_0108 | p160 | 0.1 mM                          |
| Km0434_0108 | p161 | 4.29 mM                         |
| Km0445_0108 | p162 | 0.1 mM                          |
| Km0394_0108 | p163 | 1.29 mM                         |
| Km1101_0108 | p164 | 0.1 mM                          |
| Km1322_0108 | p165 | 0.1 mM                          |
| Vmax_0111   | p166 | 0.141738392 mM·s <sup>-1</sup>  |
| Keq_0111    | p167 | 111.6 mM                        |
| Km0373_0111 | p168 | 0.1 mM                          |
| Km0362_0111 | p169 | 55.8 mM                         |
| Km0529_0111 | p170 | 0.1 mM                          |
| Vmax_0115   | p171 | 0.3662258223 mM·s <sup>-1</sup> |
| Keq_0115    | p172 | 0.6013986014                    |
| Km0434_0115 | p173 | 4.29 mM                         |
| Km1192_0115 | p174 | 0.1 mM                          |
| Km0394_0115 | p175 | 1.29 mM                         |
| Km1191_0115 | p176 | 0.1 mM                          |
| Vmax_0118   | p177 | 0.3662258223 mM·s <sup>-1</sup> |
| Keq_0118    | p178 | 1.1744966443                    |
| Km0145_0118 | p179 | 0.1 mM                          |
| Km0991_0118 | p180 | 0.298 mM                        |
| Km0180_0118 | p181 | 0.175 mM                        |
| Km1182_0118 | p182 | 0.1 mM                          |
| Vmax_0142   | p183 | 0.0414346818 mM·s <sup>-1</sup> |
| Keq_0142    | p184 | 2.6461538462                    |
| Km0386_0142 | p185 | 0.1 mM                          |
| Km0434_0142 | p186 | 4.29 mM                         |
| Km0394_0142 | p187 | 1.29 mM                         |
| Km0423_0142 | p188 | 0.44 mM                         |
| Vmax_0144   | p189 | 0.0295962013 mM·s <sup>-1</sup> |
| Keq_0144    | p190 | 0.2 mM                          |
| Km1413_0144 | p191 | 0.1 mM                          |
| Km0386_0144 | p192 | 0.1 mM                          |
| Km1012_0144 | p193 | 0.1 mM                          |
| Vmax_0148   | p194 | 2.6350043346 mM·s <sup>-1</sup> |
| Keq_0148    | p195 | 1.7631913541                    |
| Km0423_0148 | p196 | 0.44 mM                         |
| Km0434_0148 | p197 | 4.29 mM                         |
| Km0394_0148 | p198 | 1.29 mM                         |
| Vmax_0151   | p199 | 0.2095027131 mM·s <sup>-1</sup> |
| Keq_0151    | p200 | 0.2 mM                          |
| Km0299_0151 | p201 | 0.1 mM                          |
| Km0403_0151 | p202 | 0.1 mM                          |
| Km0725_0151 | p203 | 0.1 mM                          |
| Vmax_0152   | p204 | 0.2492605269 mM·s <sup>-1</sup> |
| Keq_0152    | p205 | 0.88 mM                         |

|             |      |                                  |
|-------------|------|----------------------------------|
| Km0393_0152 | p206 | 0.1 mM                           |
| Km0423_0152 | p207 | 0.44 mM                          |
| Km0725_0152 | p208 | 0.1 mM                           |
| Vmax_0153   | p209 | 0.7477815806 mM·s <sup>-1</sup>  |
| Keq_0153    | p210 | 0.1266223488                     |
| Km0785_0153 | p211 | 0.975 mM                         |
| Km0849_0153 | p212 | 0.162 mM                         |
| Km0973_0153 | p213 | 0.1 mM                           |
| Km0393_0153 | p214 | 0.1 mM                           |
| Km0739_0153 | p215 | 0.1 mM                           |
| Km1322_0153 | p216 | 0.1 mM                           |
| Vmax_0154   | p217 | 0.2501645507 mM·s <sup>-1</sup>  |
| Keq_0154    | p218 | 0.6013986014                     |
| Km0298_0154 | p219 | 0.1 mM                           |
| Km0434_0154 | p220 | 4.29 mM                          |
| Km0201_0154 | p221 | 0.1 mM                           |
| Km0394_0154 | p222 | 1.29 mM                          |
| Vmax_0165   | p223 | 63.8399999998 mM·s <sup>-1</sup> |
| Keq_0165    | p224 | 10788.8495781657                 |
| Km0359_0165 | p225 | 0.178 mM                         |
| Km1203_0165 | p226 | 0.0867 mM                        |
| Km0680_0165 | p227 | 55.5 mM                          |
| Km1198_0165 | p228 | 1.5 mM                           |
| Vmax_0173   | p229 | 0.2561951009 mM·s <sup>-1</sup>  |
| Keq_0173    | p230 | 626.9662921348                   |
| Km0359_0173 | p231 | 0.178 mM                         |
| Km1207_0173 | p232 | 0.1 mM                           |
| Km0362_0173 | p233 | 55.8 mM                          |
| Km1212_0173 | p234 | 0.1 mM                           |
| Vmax_0195   | p235 | 0.1719323841 mM·s <sup>-1</sup>  |
| Keq_0195    | p236 | 0.1251511689                     |
| Km0568_0195 | p237 | 0.193 mM                         |
| Km1543_0195 | p238 | 0.467 mM                         |
| Km0409_0195 | p239 | 0.02 mM                          |
| Km1538_0195 | p240 | 0.282 mM                         |
| Vmax_0202   | p241 | 0.4295079449 mM·s <sup>-1</sup>  |
| Keq_0202    | p242 | 2                                |
| Km0427_0202 | p243 | 0.1 mM                           |
| Km1386_0202 | p244 | 0.1 mM                           |
| Km0633_0202 | p245 | 0.1 mM                           |
| Km1187_0202 | p246 | 0.1 mM                           |
| Vmax_0203   | p247 | 0.1184848249 mM·s <sup>-1</sup>  |
| Keq_0203    | p248 | 3.14092 mM                       |
| Km0515_0203 | p249 | 0.1 mM                           |
| Km0999_0203 | p250 | 0.1 mM                           |
| Km0427_0203 | p251 | 0.1 mM                           |
| Km0991_0203 | p252 | 0.298 mM                         |
| Km1399_0203 | p253 | 0.527 mM                         |
| Vmax_0207   | p254 | 0.2615898731 mM·s <sup>-1</sup>  |
| Keq_0207    | p255 | 0.2 mM                           |
| Km0015_0207 | p256 | 0.1 mM                           |
| Km0725_0207 | p257 | 0.1 mM                           |
| Km0965_0207 | p258 | 0.1 mM                           |
| Vmax_0208   | p259 | 0.7847696192 mM·s <sup>-1</sup>  |

|             |      |                                   |
|-------------|------|-----------------------------------|
| Keq_0208    | p260 | 0.2051282051                      |
| Km0434_0208 | p261 | 4.29 mM                           |
| Km0973_0208 | p262 | 0.1 mM                            |
| Km0979_0208 | p263 | 0.1 mM                            |
| Km0015_0208 | p264 | 0.1 mM                            |
| Km0423_0208 | p265 | 0.44 mM                           |
| Km0633_0208 | p266 | 0.1 mM                            |
| Vmax_0211   | p267 | 1.5218375558 mM·s <sup>-1</sup>   |
| Keq_0211    | p268 | 0.0611282051 mM                   |
| Km0434_0211 | p269 | 4.29 mM                           |
| Km0973_0211 | p270 | 0.1 mM                            |
| Km0999_0211 | p271 | 0.1 mM                            |
| Km0423_0211 | p272 | 0.44 mM                           |
| Km0633_0211 | p273 | 0.1 mM                            |
| Km0969_0211 | p274 | 0.1 mM                            |
| Km0991_0211 | p275 | 0.298 mM                          |
| Vmax_0214   | p276 | 0.331272799 mM·s <sup>-1</sup>    |
| Keq_0214    | p277 | 2                                 |
| Km0455_0214 | p278 | 0.1 mM                            |
| Km0973_0214 | p279 | 0.1 mM                            |
| Km1194_0214 | p280 | 0.1 mM                            |
| Km1322_0214 | p281 | 0.1 mM                            |
| Vmax_0215   | p282 | 1.1282986732 mM·s <sup>-1</sup>   |
| Keq_0215    | p283 | 0.6013986014                      |
| Km0434_0215 | p284 | 4.29 mM                           |
| Km0973_0215 | p285 | 0.1 mM                            |
| Km0295_0215 | p286 | 0.1 mM                            |
| Km0394_0215 | p287 | 1.29 mM                           |
| Vmax_0216   | p288 | 3.3944017338 mM·s <sup>-1</sup>   |
| Keq_0216    | p289 | 1.1744966443                      |
| Km0991_0216 | p290 | 0.298 mM                          |
| Km1271_0216 | p291 | 0.1 mM                            |
| Km0180_0216 | p292 | 0.175 mM                          |
| Km0973_0216 | p293 | 0.1 mM                            |
| Vmax_0219   | p294 | 1.7730407721 mM·s <sup>-1</sup>   |
| Keq_0219    | p295 | 0.2 mM                            |
| Km0295_0219 | p296 | 0.1 mM                            |
| Km1212_0219 | p297 | 0.1 mM                            |
| Km0978_0219 | p298 | 0.1 mM                            |
| Km1207_0219 | p299 | 0.1 mM                            |
| Km1322_0219 | p300 | 0.1 mM                            |
| Vmax_0225   | p301 | 0.2019627697 mM·s <sup>-1</sup>   |
| Keq_0225    | p302 | 0.0466200466                      |
| Km0434_0225 | p303 | 4.29 mM                           |
| Km1386_0225 | p304 | 0.1 mM                            |
| Km0326_0225 | p305 | 0.1 mM                            |
| Km0633_0225 | p306 | 0.1 mM                            |
| Vmax_0226   | p307 | 139.4439156137 mM·s <sup>-1</sup> |
| Keq_0226    | p308 | 66.511627907 mM <sup>-1</sup>     |
| Km0394_0226 | p309 | 1.29 mM                           |
| Km1322_0226 | p310 | 0.1 mM                            |
| Km0434_0226 | p311 | 4.29 mM                           |
| Vmax_0231   | p312 | 0.0183597622 mM·s <sup>-1</sup>   |
| Keq_0231    | p313 | 2                                 |

|             |      |                                 |
|-------------|------|---------------------------------|
| Km0262_0231 | p314 | 0.1 mM                          |
| Km1212_0231 | p315 | 0.1 mM                          |
| Km0122_0231 | p316 | 0.1 mM                          |
| Km1207_0231 | p317 | 0.1 mM                          |
| Vmax_0233   | p318 | 0.027661975 mM·s <sup>-1</sup>  |
| Keq_0233    | p319 | 20 mM <sup>-1</sup>             |
| Km0664_0233 | p320 | 0.1 mM                          |
| Km1212_0233 | p321 | 0.1 mM                          |
| Km1275_0233 | p322 | 0.1 mM                          |
| Km0662_0233 | p323 | 0.1 mM                          |
| Km1207_0233 | p324 | 0.1 mM                          |
| Vmax_0234   | p325 | 0.0286140852 mM·s <sup>-1</sup> |
| Keq_0234    | p326 | 0.2 mM                          |
| Km1207_0234 | p327 | 0.1 mM                          |
| Km1578_0234 | p328 | 0.1 mM                          |
| Km0456_0234 | p329 | 0.1 mM                          |
| Km1212_0234 | p330 | 0.1 mM                          |
| Km1579_0234 | p331 | 0.1 mM                          |
| Vmax_0235   | p332 | 0.0286140852 mM·s <sup>-1</sup> |
| Keq_0235    | p333 | 0.01156 mM                      |
| Km0297_0235 | p334 | 0.1 mM                          |
| Km1198_0235 | p335 | 1.5 mM                          |
| Km0209_0235 | p336 | 0.1 mM                          |
| Km0456_0235 | p337 | 0.1 mM                          |
| Km1203_0235 | p338 | 0.0867 mM                       |
| Vmax_0236   | p339 | 0.0182089633 mM·s <sup>-1</sup> |
| Keq_0236    | p340 | 2                               |
| Km0209_0236 | p341 | 0.1 mM                          |
| Km1212_0236 | p342 | 0.1 mM                          |
| Km0296_0236 | p343 | 0.1 mM                          |
| Km1207_0236 | p344 | 0.1 mM                          |
| Vmax_0237   | p345 | 0.0182089633 mM·s <sup>-1</sup> |
| Keq_0237    | p346 | 2                               |
| Km1212_0237 | p347 | 0.1 mM                          |
| Km1579_0237 | p348 | 0.1 mM                          |
| Km1207_0237 | p349 | 0.1 mM                          |
| Km1569_0237 | p350 | 0.1 mM                          |
| Vmax_0238   | p351 | 0.0286140852 mM·s <sup>-1</sup> |
| Keq_0238    | p352 | 20 mM <sup>-1</sup>             |
| Km0296_0238 | p353 | 0.1 mM                          |
| Km1212_0238 | p354 | 0.1 mM                          |
| Km1275_0238 | p355 | 0.1 mM                          |
| Km1207_0238 | p356 | 0.1 mM                          |
| Km1576_0238 | p357 | 0.1 mM                          |
| Vmax_0239   | p358 | 0.0286140852 mM·s <sup>-1</sup> |
| Keq_0239    | p359 | 20 mM <sup>-1</sup>             |
| Km1212_0239 | p360 | 0.1 mM                          |
| Km1275_0239 | p361 | 0.1 mM                          |
| Km1576_0239 | p362 | 0.1 mM                          |
| Km1207_0239 | p363 | 0.1 mM                          |
| Km1577_0239 | p364 | 0.1 mM                          |
| Vmax_0240   | p365 | 0.0286140852 mM·s <sup>-1</sup> |
| Keq_0240    | p366 | 20 mM <sup>-1</sup>             |
| Km1212_0240 | p367 | 0.1 mM                          |

|             |      |                                 |
|-------------|------|---------------------------------|
| Km1275_0240 | p368 | 0.1 mM                          |
| Km1577_0240 | p369 | 0.1 mM                          |
| Km1207_0240 | p370 | 0.1 mM                          |
| Km1578_0240 | p371 | 0.1 mM                          |
| Vmax_0241   | p372 | 0.3719831077 mM·s <sup>-1</sup> |
| Keq_0241    | p373 | 2000 mM <sup>-1</sup> _cubed    |
| Km0122_0241 | p374 | 0.1 mM                          |
| Km1212_0241 | p375 | 0.1 mM                          |
| Km1275_0241 | p376 | 0.1 mM                          |
| Km0297_0241 | p377 | 0.1 mM                          |
| Km1207_0241 | p378 | 0.1 mM                          |
| Vmax_0242   | p379 | 0.027661975 mM·s <sup>-1</sup>  |
| Keq_0242    | p380 | 20 mM <sup>-1</sup>             |
| Km0657_0242 | p381 | 0.1 mM                          |
| Km1212_0242 | p382 | 0.1 mM                          |
| Km1275_0242 | p383 | 0.1 mM                          |
| Km0664_0242 | p384 | 0.1 mM                          |
| Km1207_0242 | p385 | 0.1 mM                          |
| Vmax_0243   | p386 | 0.007654966 mM·s <sup>-1</sup>  |
| Keq_0243    | p387 | 2                               |
| Km0700_0243 | p388 | 0.1 mM                          |
| Km0657_0243 | p389 | 0.1 mM                          |
| Vmax_0244   | p390 | 0.0172664704 mM·s <sup>-1</sup> |
| Keq_0244    | p391 | 2                               |
| Km0662_0244 | p392 | 0.1 mM                          |
| Km1212_0244 | p393 | 0.1 mM                          |
| Km0666_0244 | p394 | 0.1 mM                          |
| Km1207_0244 | p395 | 0.1 mM                          |
| Vmax_0250   | p396 | 4.6832050287 mM·s <sup>-1</sup> |
| Keq_0250    | p397 | 0.0538903614 mM                 |
| Km0434_0250 | p398 | 4.29 mM                         |
| Km0445_0250 | p399 | 0.1 mM                          |
| Km0999_0250 | p400 | 0.1 mM                          |
| Km0394_0250 | p401 | 1.29 mM                         |
| Km0455_0250 | p402 | 0.1 mM                          |
| Km0991_0250 | p403 | 0.298 mM                        |
| Km1322_0250 | p404 | 0.1 mM                          |
| Vmax_0257   | p405 | 0.0162071757 mM·s <sup>-1</sup> |
| Keq_0257    | p406 | 2                               |
| Km0539_0257 | p407 | 0.1 mM                          |
| Km1331_0257 | p408 | 0.1 mM                          |
| Km0471_0257 | p409 | 0.1 mM                          |
| Km0633_0257 | p410 | 0.1 mM                          |
| Vmax_0259   | p411 | 0.001139623 mM·s <sup>-1</sup>  |
| Keq_0259    | p412 | 20 mM <sup>-1</sup>             |
| Km0475_0259 | p413 | 0.1 mM                          |
| Km1212_0259 | p414 | 0.1 mM                          |
| Km1275_0259 | p415 | 0.1 mM                          |
| Km0481_0259 | p416 | 0.1 mM                          |
| Km1207_0259 | p417 | 0.1 mM                          |
| Vmax_0267   | p418 | 0.002279246 mM·s <sup>-1</sup>  |
| Keq_0267    | p419 | 20 mM <sup>-1</sup>             |
| Km0481_0267 | p420 | 0.1 mM                          |
| Km1212_0267 | p421 | 0.1 mM                          |

|             |      |                                 |
|-------------|------|---------------------------------|
| Km1275_0267 | p422 | 0.1 mM                          |
| Km0493_0267 | p423 | 0.1 mM                          |
| Km1207_0267 | p424 | 0.1 mM                          |
| Vmax_0269   | p425 | 0.002279246 mM·s <sup>-1</sup>  |
| Keq_0269    | p426 | 20 mM <sup>-1</sup>             |
| Km0493_0269 | p427 | 0.1 mM                          |
| Km1212_0269 | p428 | 0.1 mM                          |
| Km1275_0269 | p429 | 0.1 mM                          |
| Km0499_0269 | p430 | 0.1 mM                          |
| Km1207_0269 | p431 | 0.1 mM                          |
| Vmax_0278   | p432 | 0.2429323601 mM·s <sup>-1</sup> |
| Keq_0278    | p433 | 2                               |
| Km0515_0278 | p434 | 0.1 mM                          |
| Km1377_0278 | p435 | 0.1 mM                          |
| Vmax_0279   | p436 | 0.4587440054 mM·s <sup>-1</sup> |
| Keq_0279    | p437 | 0.2 mM                          |
| Km0324_0279 | p438 | 0.1 mM                          |
| Km0515_0279 | p439 | 0.1 mM                          |
| Km1322_0279 | p440 | 0.1 mM                          |
| Vmax_0280   | p441 | 1.2002358883 mM·s <sup>-1</sup> |
| Keq_0280    | p442 | 2                               |
| Km0516_0280 | p443 | 0.1 mM                          |
| Km0940_0280 | p444 | 0.1 mM                          |
| Vmax_0300   | p445 | 2.8005504059 mM·s <sup>-1</sup> |
| Keq_0300    | p446 | 2                               |
| Km0373_0300 | p447 | 0.1 mM                          |
| Km1271_0300 | p448 | 0.1 mM                          |
| Km0522_0300 | p449 | 0.1 mM                          |
| Km0529_0300 | p450 | 0.1 mM                          |
| Vmax_0302   | p451 | 1.2002358883 mM·s <sup>-1</sup> |
| Keq_0302    | p452 | 2                               |
| Km0522_0302 | p453 | 0.1 mM                          |
| Km0516_0302 | p454 | 0.1 mM                          |
| Vmax_0307   | p455 | 0.2955292357 mM·s <sup>-1</sup> |
| Keq_0307    | p456 | 0.0926654239                    |
| Km0419_0307 | p457 | 0.1 mM                          |
| Km0434_0307 | p458 | 4.29 mM                         |
| Km1559_0307 | p459 | 0.649 mM                        |
| Km0394_0307 | p460 | 1.29 mM                         |
| Km0539_0307 | p461 | 0.1 mM                          |
| Km1322_0307 | p462 | 0.1 mM                          |
| Vmax_0309   | p463 | 0.0412581087 mM·s <sup>-1</sup> |
| Keq_0309    | p464 | 10 mM <sup>-1</sup>             |
| Km1012_0309 | p465 | 0.1 mM                          |
| Km1039_0309 | p466 | 0.2 mM                          |
| Km0980_0309 | p467 | 0.1 mM                          |
| Vmax_0310   | p468 | 0.5955016523 mM·s <sup>-1</sup> |
| Keq_0310    | p469 | 0.02 mM_squared                 |
| Km0980_0310 | p470 | 0.1 mM                          |
| Km0178_0310 | p471 | 0.1 mM                          |
| Km0419_0310 | p472 | 0.1 mM                          |
| Km0981_0310 | p473 | 0.1 mM                          |
| Vmax_0311   | p474 | 0.4054065996 mM·s <sup>-1</sup> |
| Keq_0311    | p475 | 1116                            |

|             |      |                                 |
|-------------|------|---------------------------------|
| Km0981_0311 | p476 | 0.1 mM                          |
| Km1233_0311 | p477 | 0.1 mM                          |
| Km0362_0311 | p478 | 55.8 mM                         |
| Km0980_0311 | p479 | 0.1 mM                          |
| Vmax_0312   | p480 | 0.0577613521 mM·s <sup>-1</sup> |
| Keq_0312    | p481 | 1116                            |
| Km0841_0312 | p482 | 0.1 mM                          |
| Km1234_0312 | p483 | 0.1 mM                          |
| Km0362_0312 | p484 | 55.8 mM                         |
| Km0981_0312 | p485 | 0.1 mM                          |
| Vmax_0317   | p486 | 0.4170288838 mM·s <sup>-1</sup> |
| Keq_0317    | p487 | 200 mM <sup>-1</sup> _squared   |
| Km1059_0317 | p488 | 0.1 mM                          |
| Km1212_0317 | p489 | 0.1 mM                          |
| Km1275_0317 | p490 | 0.1 mM                          |
| Km0262_0317 | p491 | 0.1 mM                          |
| Km0722_0317 | p492 | 0.1 mM                          |
| Km1207_0317 | p493 | 0.1 mM                          |
| Vmax_0326   | p494 | 0.0023369978 mM·s <sup>-1</sup> |
| Keq_0326    | p495 | 20 mM <sup>-1</sup>             |
| Km0419_0326 | p496 | 0.1 mM                          |
| Km0654_0326 | p497 | 0.1 mM                          |
| Km0589_0326 | p498 | 0.1 mM                          |
| Vmax_0330   | p499 | 0.0065435937 mM·s <sup>-1</sup> |
| Keq_0330    | p500 | 6.6511627907                    |
| Km0394_0330 | p501 | 1.29 mM                         |
| Km0613_0330 | p502 | 0.1 mM                          |
| Km0434_0330 | p503 | 4.29 mM                         |
| Km0615_0330 | p504 | 0.1 mM                          |
| Vmax_0336   | p505 | 0.033719704 mM·s <sup>-1</sup>  |
| Keq_0336    | p506 | 2                               |
| Km0529_0336 | p507 | 0.1 mM                          |
| Km1524_0336 | p508 | 0.1 mM                          |
| Km0380_0336 | p509 | 0.1 mM                          |
| Km0619_0336 | p510 | 0.1 mM                          |
| Vmax_0337   | p511 | 0.0004661974 mM·s <sup>-1</sup> |
| Keq_0337    | p512 | 0.2 mM                          |
| Km1331_0337 | p513 | 0.1 mM                          |
| Km0619_0337 | p514 | 0.1 mM                          |
| Km1322_0337 | p515 | 0.1 mM                          |
| Vmax_0339   | p516 | 0.331272799 mM·s <sup>-1</sup>  |
| Keq_0339    | p517 | 2                               |
| Km0061_0339 | p518 | 0.1 mM                          |
| Km1275_0339 | p519 | 0.1 mM                          |
| Km0837_0339 | p520 | 0.1 mM                          |
| Km1269_0339 | p521 | 0.1 mM                          |
| Vmax_0340   | p522 | 0.0005180105 mM·s <sup>-1</sup> |
| Keq_0340    | p523 | 20 mM <sup>-1</sup>             |
| Km1084_0340 | p524 | 0.1 mM                          |
| Km1445_0340 | p525 | 0.1 mM                          |
| Km0475_0340 | p526 | 0.1 mM                          |
| Vmax_0344   | p527 | 0.0096672846 mM·s <sup>-1</sup> |
| Keq_0344    | p528 | 2                               |
| Km0625_0344 | p529 | 0.1 mM                          |

|             |      |                                  |
|-------------|------|----------------------------------|
| Km1212_0344 | p530 | 0.1 mM                           |
| Km1207_0344 | p531 | 0.1 mM                           |
| Km1487_0344 | p532 | 0.1 mM                           |
| Vmax_0349   | p533 | 0.1419740567 mM·s <sup>-1</sup>  |
| Keq_0349    | p534 | 2                                |
| Km1194_0349 | p535 | 0.1 mM                           |
| Km0061_0349 | p536 | 0.1 mM                           |
| Vmax_0352   | p537 | 0.5851149955 mM·s <sup>-1</sup>  |
| Keq_0352    | p538 | 2                                |
| Km0016_0352 | p539 | 0.1 mM                           |
| Km0232_0352 | p540 | 0.1 mM                           |
| Vmax_0353   | p541 | 0.1985005508 mM·s <sup>-1</sup>  |
| Keq_0353    | p542 | 2                                |
| Km0008_0353 | p543 | 0.1 mM                           |
| Km0056_0353 | p544 | 0.1 mM                           |
| Vmax_0355   | p545 | 0.0368918659 mM·s <sup>-1</sup>  |
| Keq_0355    | p546 | 2                                |
| Km0943_0355 | p547 | 0.1 mM                           |
| Km1376_0355 | p548 | 0.1 mM                           |
| Km0633_0355 | p549 | 0.1 mM                           |
| Km0745_0355 | p550 | 0.1 mM                           |
| Vmax_0361   | p551 | 2.2108191185 mM·s <sup>-1</sup>  |
| Keq_0361    | p552 | 2                                |
| Km0645_0361 | p553 | 0.1 mM                           |
| Km0743_0361 | p554 | 0.1 mM                           |
| Km0644_0361 | p555 | 0.1 mM                           |
| Km0739_0361 | p556 | 0.1 mM                           |
| Vmax_0362   | p557 | 1.5791565132 mM·s <sup>-1</sup>  |
| Keq_0362    | p558 | 0.2 mM                           |
| Km0644_0362 | p559 | 0.1 mM                           |
| Km0645_0362 | p560 | 0.1 mM                           |
| Km1107_0362 | p561 | 0.1 mM                           |
| Vmax_0364   | p562 | 0.009242201 mM·s <sup>-1</sup>   |
| Keq_0364    | p563 | 0.2 mM                           |
| Km0656_0364 | p564 | 0.1 mM                           |
| Km0633_0364 | p565 | 0.1 mM                           |
| Km0654_0364 | p566 | 0.1 mM                           |
| Vmax_0366   | p567 | 17.5300909501 mM·s <sup>-1</sup> |
| Keq_0366    | p568 | 18.1065088757                    |
| Km0188_0366 | p569 | 0.0169 mM                        |
| Km1360_0366 | p570 | 0.153 mM                         |
| Vmax_0386   | p571 | 0.0048692984 mM·s <sup>-1</sup>  |
| Keq_0386    | p572 | 0.2 mM                           |
| Km0595_0386 | p573 | 0.1 mM                           |
| Km1101_0386 | p574 | 0.1 mM                           |
| Km1212_0386 | p575 | 0.1 mM                           |
| Km0456_0386 | p576 | 0.1 mM                           |
| Km0529_0386 | p577 | 0.1 mM                           |
| Km1065_0386 | p578 | 0.1 mM                           |
| Km1207_0386 | p579 | 0.1 mM                           |
| Vmax_0387   | p580 | 0.0048692983 mM·s <sup>-1</sup>  |
| Keq_0387    | p581 | 0.2 mM                           |
| Km1065_0387 | p582 | 0.1 mM                           |
| Km1101_0387 | p583 | 0.1 mM                           |



|             |      |                                   |
|-------------|------|-----------------------------------|
| Km1212_0387 | p584 | 0.1 mM                            |
| Km0456_0387 | p585 | 0.1 mM                            |
| Km0529_0387 | p586 | 0.1 mM                            |
| Km1161_0387 | p587 | 0.1 mM                            |
| Km1207_0387 | p588 | 0.1 mM                            |
| Vmax_0389   | p589 | 0.0048692983 mM·s <sup>-1</sup>   |
| Keq_0389    | p590 | 0.2 mM                            |
| Km1101_0389 | p591 | 0.1 mM                            |
| Km1161_0389 | p592 | 0.1 mM                            |
| Km1212_0389 | p593 | 0.1 mM                            |
| Km0456_0389 | p594 | 0.1 mM                            |
| Km0529_0389 | p595 | 0.1 mM                            |
| Km1207_0389 | p596 | 0.1 mM                            |
| Km1286_0389 | p597 | 0.1 mM                            |
| Vmax_0391   | p598 | 0.0048692983 mM·s <sup>-1</sup>   |
| Keq_0391    | p599 | 0.2 mM                            |
| Km1101_0391 | p600 | 0.1 mM                            |
| Km1212_0391 | p601 | 0.1 mM                            |
| Km1286_0391 | p602 | 0.1 mM                            |
| Km0456_0391 | p603 | 0.1 mM                            |
| Km0529_0391 | p604 | 0.1 mM                            |
| Km1207_0391 | p605 | 0.1 mM                            |
| Km1449_0391 | p606 | 0.1 mM                            |
| Vmax_0393   | p607 | 1.9093865602 mM·s <sup>-1</sup>   |
| Keq_0393    | p608 | 0.002 mM_cubed                    |
| Km1101_0393 | p609 | 0.1 mM                            |
| Km1212_0393 | p610 | 0.1 mM                            |
| Km1449_0393 | p611 | 0.1 mM                            |
| Km0456_0393 | p612 | 0.1 mM                            |
| Km0529_0393 | p613 | 0.1 mM                            |
| Km1084_0393 | p614 | 0.1 mM                            |
| Km1207_0393 | p615 | 0.1 mM                            |
| Vmax_0397   | p616 | 0.6809514269 mM·s <sup>-1</sup>   |
| Keq_0397    | p617 | 0.2 mM                            |
| Km1101_0397 | p618 | 0.1 mM                            |
| Km1212_0397 | p619 | 0.1 mM                            |
| Km1255_0397 | p620 | 0.1 mM                            |
| Km0456_0397 | p621 | 0.1 mM                            |
| Km0529_0397 | p622 | 0.1 mM                            |
| Km0602_0397 | p623 | 0.1 mM                            |
| Km1207_0397 | p624 | 0.1 mM                            |
| Vmax_0398   | p625 | 133.5099446538 mM·s <sup>-1</sup> |
| Keq_0398    | p626 | 0.002 mM_cubed                    |
| Km0373_0398 | p627 | 0.1 mM                            |
| Km1101_0398 | p628 | 0.1 mM                            |
| Km1212_0398 | p629 | 0.1 mM                            |
| Km0456_0398 | p630 | 0.1 mM                            |
| Km0529_0398 | p631 | 0.1 mM                            |
| Km1207_0398 | p632 | 0.1 mM                            |
| Km1255_0398 | p633 | 0.1 mM                            |
| Vmax_0399   | p634 | 0.2126628293 mM·s <sup>-1</sup>   |
| Keq_0399    | p635 | 19.5                              |
| Km0423_0399 | p636 | 0.44 mM                           |
| Km0602_0399 | p637 | 0.1 mM                            |

|             |      |                                   |
|-------------|------|-----------------------------------|
| Km0633_0399 | p638 | 0.1 mM                            |
| Km0434_0399 | p639 | 4.29 mM                           |
| Km0529_0399 | p640 | 0.1 mM                            |
| Km0595_0399 | p641 | 0.1 mM                            |
| Vmax_0407   | p642 | 0.0015540314 mM·s <sup>-1</sup>   |
| Keq_0407    | p643 | 19.5                              |
| Km0423_0407 | p644 | 0.44 mM                           |
| Km0633_0407 | p645 | 0.1 mM                            |
| Km1454_0407 | p646 | 0.1 mM                            |
| Km0434_0407 | p647 | 4.29 mM                           |
| Km0529_0407 | p648 | 0.1 mM                            |
| Km1449_0407 | p649 | 0.1 mM                            |
| Vmax_0432   | p650 | 0.014607895 mM·s <sup>-1</sup>    |
| Keq_0432    | p651 | 0.2 mM                            |
| Km0602_0432 | p652 | 0.1 mM                            |
| Km1101_0432 | p653 | 0.1 mM                            |
| Km1212_0432 | p654 | 0.1 mM                            |
| Km0456_0432 | p655 | 0.1 mM                            |
| Km0529_0432 | p656 | 0.1 mM                            |
| Km1073_0432 | p657 | 0.1 mM                            |
| Km1207_0432 | p658 | 0.1 mM                            |
| Vmax_0433   | p659 | 0.014607895 mM·s <sup>-1</sup>    |
| Keq_0433    | p660 | 0.2 mM                            |
| Km1073_0433 | p661 | 0.1 mM                            |
| Km1101_0433 | p662 | 0.1 mM                            |
| Km1212_0433 | p663 | 0.1 mM                            |
| Km0456_0433 | p664 | 0.1 mM                            |
| Km0529_0433 | p665 | 0.1 mM                            |
| Km1176_0433 | p666 | 0.1 mM                            |
| Km1207_0433 | p667 | 0.1 mM                            |
| Vmax_0434   | p668 | 0.014607895 mM·s <sup>-1</sup>    |
| Keq_0434    | p669 | 0.2 mM                            |
| Km1101_0434 | p670 | 0.1 mM                            |
| Km1176_0434 | p671 | 0.1 mM                            |
| Km1212_0434 | p672 | 0.1 mM                            |
| Km0456_0434 | p673 | 0.1 mM                            |
| Km0529_0434 | p674 | 0.1 mM                            |
| Km1207_0434 | p675 | 0.1 mM                            |
| Km1302_0434 | p676 | 0.1 mM                            |
| Vmax_0435   | p677 | 0.0048692983 mM·s <sup>-1</sup>   |
| Keq_0435    | p678 | 0.2 mM                            |
| Km1101_0435 | p679 | 0.1 mM                            |
| Km1212_0435 | p680 | 0.1 mM                            |
| Km1302_0435 | p681 | 0.1 mM                            |
| Km0456_0435 | p682 | 0.1 mM                            |
| Km0529_0435 | p683 | 0.1 mM                            |
| Km1207_0435 | p684 | 0.1 mM                            |
| Km1454_0435 | p685 | 0.1 mM                            |
| Vmax_0438   | p686 | 133.1333439792 mM·s <sup>-1</sup> |
| Keq_0438    | p687 | 20 mM <sup>-1</sup>               |
| Km0710_0438 | p688 | 0.1 mM                            |
| Km1275_0438 | p689 | 0.1 mM                            |
| Km0709_0438 | p690 | 0.1 mM                            |
| Vmax_0439   | p691 | 0.9485049398 mM·s <sup>-1</sup>   |

|             |      |                                  |
|-------------|------|----------------------------------|
| Keq_0439    | p692 | 2                                |
| Km0709_0439 | p693 | 0.1 mM                           |
| Km1535_0439 | p694 | 0.1 mM                           |
| Km0710_0439 | p695 | 0.1 mM                           |
| Km1537_0439 | p696 | 0.1 mM                           |
| Vmax_0445   | p697 | 0.5739005538 mM·s <sup>-1</sup>  |
| Keq_0445    | p698 | 0.1156                           |
| Km0722_0445 | p699 | 0.1 mM                           |
| Km1198_0445 | p700 | 1.5 mM                           |
| Km0456_0445 | p701 | 0.1 mM                           |
| Km1203_0445 | p702 | 0.0867 mM                        |
| Vmax_0446   | p703 | 0.4160606166 mM·s <sup>-1</sup>  |
| Keq_0446    | p704 | 6.6511627907                     |
| Km0120_0446 | p705 | 0.1 mM                           |
| Km0394_0446 | p706 | 1.29 mM                          |
| Km1322_0446 | p707 | 0.1 mM                           |
| Km0434_0446 | p708 | 4.29 mM                          |
| Km0722_0446 | p709 | 0.1 mM                           |
| Km1487_0446 | p710 | 0.1 mM                           |
| Vmax_0450   | p711 | 25.0072374427 mM·s <sup>-1</sup> |
| Keq_0450    | p712 | 0.0398434783 mM                  |
| Km0555_0450 | p713 | 1.15 mM                          |
| Km0629_0450 | p714 | 0.29 mM                          |
| Km0764_0450 | p715 | 0.079 mM                         |
| Vmax_0451   | p716 | 0.4322118678 mM·s <sup>-1</sup>  |
| Keq_0451    | p717 | 2                                |
| Km0725_0451 | p718 | 0.1 mM                           |
| Km0066_0451 | p719 | 0.1 mM                           |
| Vmax_0462   | p720 | 0.0368918659 mM·s <sup>-1</sup>  |
| Keq_0462    | p721 | 2                                |
| Km0745_0462 | p722 | 0.1 mM                           |
| Km0943_0462 | p723 | 0.1 mM                           |
| Km0190_0462 | p724 | 0.1 mM                           |
| Km0633_0462 | p725 | 0.1 mM                           |
| Vmax_0466   | p726 | 13.7906063214 mM·s <sup>-1</sup> |
| Keq_0466    | p727 | 1.0362694301                     |
| Km0568_0466 | p728 | 0.193 mM                         |
| Km1207_0466 | p729 | 0.1 mM                           |
| Km0335_0466 | p730 | 0.1 mM                           |
| Km1212_0466 | p731 | 0.1 mM                           |
| Vmax_0467   | p732 | 14.3453751324 mM·s <sup>-1</sup> |
| Keq_0467    | p733 | 0.6103626943                     |
| Km0568_0467 | p734 | 0.193 mM                         |
| Km0557_0467 | p735 | 0.0589 mM                        |
| Vmax_0470   | p736 | 10.0719265766 mM·s <sup>-1</sup> |
| Keq_0470    | p737 | 589.2239248641 mM <sup>-1</sup>  |
| Km0180_0470 | p738 | 0.175 mM                         |
| Km0419_0470 | p739 | 0.1 mM                           |
| Km1203_0470 | p740 | 0.0867 mM                        |
| Km0991_0470 | p741 | 0.298 mM                         |
| Km1198_0470 | p742 | 1.5 mM                           |
| Vmax_0471   | p743 | 10.0719265766 mM·s <sup>-1</sup> |
| Keq_0471    | p744 | 34.0571428571 mM <sup>-1</sup>   |
| Km0180_0471 | p745 | 0.175 mM                         |

|             |      |                                  |
|-------------|------|----------------------------------|
| Km0419_0471 | p746 | 0.1 mM                           |
| Km1212_0471 | p747 | 0.1 mM                           |
| Km0991_0471 | p748 | 0.298 mM                         |
| Km1207_0471 | p749 | 0.1 mM                           |
| Vmax_0476   | p750 | 6.1984682154 mM·s <sup>-1</sup>  |
| Keq_0476    | p751 | 0.2018116112                     |
| Km0419_0476 | p752 | 0.1 mM                           |
| Km0434_0476 | p753 | 4.29 mM                          |
| Km0991_0476 | p754 | 0.298 mM                         |
| Km0394_0476 | p755 | 1.29 mM                          |
| Km0999_0476 | p756 | 0.1 mM                           |
| Km1322_0476 | p757 | 0.1 mM                           |
| Vmax_0481   | p758 | 0.2602857706 mM·s <sup>-1</sup>  |
| Keq_0481    | p759 | 0.2 mM                           |
| Km0754_0481 | p760 | 0.1 mM                           |
| Km1212_0481 | p761 | 0.1 mM                           |
| Km0750_0481 | p762 | 0.1 mM                           |
| Km1207_0481 | p763 | 0.1 mM                           |
| Vmax_0483   | p764 | 0.2129610851 mM·s <sup>-1</sup>  |
| Keq_0483    | p765 | 200 mM <sup>-1</sup> _squared    |
| Km0750_0483 | p766 | 0.1 mM                           |
| Km0837_0483 | p767 | 0.1 mM                           |
| Km0754_0483 | p768 | 0.1 mM                           |
| Vmax_0486   | p769 | 68.0634738371 mM·s <sup>-1</sup> |
| Keq_0486    | p770 | 0.0107844557 mM <sup>-1</sup>    |
| Km0764_0486 | p771 | 0.079 mM                         |
| Km1198_0486 | p772 | 1.5 mM                           |
| Km1322_0486 | p773 | 0.1 mM                           |
| Km0075_0486 | p774 | 0.000737 mM                      |
| Km1203_0486 | p775 | 0.0867 mM                        |
| Vmax_0489   | p776 | 0.311 mM·s <sup>-1</sup>         |
| Keq_0489    | p777 | 0.4379562044 mM                  |
| Km0767_0489 | p778 | 0.0685 mM                        |
| Km0765_0489 | p779 | 0.15 mM                          |
| Km1322_0489 | p780 | 0.1 mM                           |
| Vmax_0491   | p781 | 0.452259852 mM·s <sup>-1</sup>   |
| Keq_0491    | p782 | 8.1732490156                     |
| Km0629_0491 | p783 | 0.29 mM                          |
| Km1203_0491 | p784 | 0.0867 mM                        |
| Km0767_0491 | p785 | 0.0685 mM                        |
| Km1198_0491 | p786 | 1.5 mM                           |
| Vmax_0495   | p787 | 0.016859852 mM·s <sup>-1</sup>   |
| Keq_0495    | p788 | 2.9197080292                     |
| Km0380_0495 | p789 | 0.1 mM                           |
| Km0767_0495 | p790 | 0.0685 mM                        |
| Km0082_0495 | p791 | 0.1 mM                           |
| Km0529_0495 | p792 | 0.1 mM                           |
| Vmax_0499   | p793 | 0.2933037983 mM·s <sup>-1</sup>  |
| Keq_0499    | p794 | 2                                |
| Km0120_0499 | p795 | 0.1 mM                           |
| Km0325_0499 | p796 | 0.1 mM                           |
| Km0301_0499 | p797 | 0.1 mM                           |
| Km1487_0499 | p798 | 0.1 mM                           |
| Vmax_0502   | p799 | 1.1684758001 mM·s <sup>-1</sup>  |

|             |      |                                 |
|-------------|------|---------------------------------|
| Keq_0502    | p800 | 1.95                            |
| Km1039_0502 | p801 | 0.2 mM                          |
| Km1487_0502 | p802 | 0.1 mM                          |
| Km0306_0502 | p803 | 0.1 mM                          |
| Km1003_0502 | p804 | 0.195 mM                        |
| Vmax_0510   | p805 | 0.9982731186 mM·s <sup>-1</sup> |
| Keq_0510    | p806 | 0.1207708779 mM                 |
| Km1543_0510 | p807 | 0.467 mM                        |
| Km0773_0510 | p808 | 0.1 mM                          |
| Km1538_0510 | p809 | 0.282 mM                        |
| Vmax_0514   | p810 | 0.480706014 mM·s <sup>-1</sup>  |
| Keq_0514    | p811 | 0.124751439 mM                  |
| Km0434_0514 | p812 | 4.29 mM                         |
| Km0999_0514 | p813 | 0.1 mM                          |
| Km1565_0514 | p814 | 0.049 mM                        |
| Km0423_0514 | p815 | 0.44 mM                         |
| Km0633_0514 | p816 | 0.1 mM                          |
| Km0782_0514 | p817 | 0.1 mM                          |
| Km0991_0514 | p818 | 0.298 mM                        |
| Vmax_0525   | p819 | 0.003115997 mM·s <sup>-1</sup>  |
| Keq_0525    | p820 | 0.0020512821 mM·squared         |
| Km0785_0525 | p821 | 0.975 mM                        |
| Km0141_0525 | p822 | 0.1 mM                          |
| Km0633_0525 | p823 | 0.1 mM                          |
| Km0722_0525 | p824 | 0.1 mM                          |
| Vmax_0528   | p825 | 0.0044835735 mM·s <sup>-1</sup> |
| Keq_0528    | p826 | 0.6013986014                    |
| Km0434_0528 | p827 | 4.29 mM                         |
| Km0782_0528 | p828 | 0.1 mM                          |
| Km0394_0528 | p829 | 1.29 mM                         |
| Km0739_0528 | p830 | 0.1 mM                          |
| Vmax_0529   | p831 | 0.0044835735 mM·s <sup>-1</sup> |
| Keq_0529    | p832 | 1.1428571429                    |
| Km0586_0529 | p833 | 0.175 mM                        |
| Km0782_0529 | p834 | 0.1 mM                          |
| Km0582_0529 | p835 | 0.1 mM                          |
| Km0739_0529 | p836 | 0.1 mM                          |
| Vmax_0534   | p837 | 52.08 mM·s <sup>-1</sup>        |
| Keq_0534    | p838 | 0.0739298918                    |
| Km0434_0534 | p839 | 4.29 mM                         |
| Km0563_0534 | p840 | 1.57 mM                         |
| Km0394_0534 | p841 | 1.29 mM                         |
| Km0568_0534 | p842 | 0.193 mM                        |
| Vmax_0536   | p843 | 0.4327773636 mM·s <sup>-1</sup> |
| Keq_0536    | p844 | 0.00668168                      |
| Km1010_0536 | p845 | 0.1 mM                          |
| Km1198_0536 | p846 | 1.5 mM                          |
| Km1006_0536 | p847 | 0.1 mM                          |
| Km1203_0536 | p848 | 0.0867 mM                       |
| Vmax_0537   | p849 | 0.1442591212 mM·s <sup>-1</sup> |
| Keq_0537    | p850 | 0.2 mM                          |
| Km1011_0537 | p851 | 0.1 mM                          |
| Km1010_0537 | p852 | 0.1 mM                          |
| Km1322_0537 | p853 | 0.1 mM                          |

|             |      |                                  |
|-------------|------|----------------------------------|
| Vmax_0538   | p854 | 0.2019627697 mM·s <sup>-1</sup>  |
| Keq_0538    | p855 | 1.1744966443                     |
| Km0207_0538 | p856 | 0.1 mM                           |
| Km0991_0538 | p857 | 0.298 mM                         |
| Km0180_0538 | p858 | 0.175 mM                         |
| Km1011_0538 | p859 | 0.1 mM                           |
| Vmax_0542   | p860 | 0.2758234397 mM·s <sup>-1</sup>  |
| Keq_0542    | p861 | 2                                |
| Km0454_0542 | p862 | 0.1 mM                           |
| Km0836_0542 | p863 | 0.1 mM                           |
| Vmax_0543   | p864 | 0.643588026 mM·s <sup>-1</sup>   |
| Keq_0543    | p865 | 1.1428571429                     |
| Km0180_0543 | p866 | 0.175 mM                         |
| Km0373_0543 | p867 | 0.1 mM                           |
| Km0529_0543 | p868 | 0.1 mM                           |
| Km0835_0543 | p869 | 0.1 mM                           |
| Vmax_0545   | p870 | 1.0113526123 mM·s <sup>-1</sup>  |
| Keq_0545    | p871 | 0.01156 mM                       |
| Km0836_0545 | p872 | 0.1 mM                           |
| Km1198_0545 | p873 | 1.5 mM                           |
| Km0176_0545 | p874 | 0.1 mM                           |
| Km1203_0545 | p875 | 0.0867 mM                        |
| Km0456_0545 | p876 | 0.1 mM                           |
| Vmax_0547   | p877 | 1.1282986732 mM·s <sup>-1</sup>  |
| Keq_0547    | p878 | 2                                |
| Km0978_0547 | p879 | 0.1 mM                           |
| Km1212_0547 | p880 | 0.1 mM                           |
| Km1014_0547 | p881 | 0.1 mM                           |
| Km1207_0547 | p882 | 0.1 mM                           |
| Vmax_0548   | p883 | 0.530488875 mM·s <sup>-1</sup>   |
| Keq_0548    | p884 | 0.6013986014                     |
| Km0434_0548 | p885 | 4.29 mM                          |
| Km1014_0548 | p886 | 0.1 mM                           |
| Km0394_0548 | p887 | 1.29 mM                          |
| Km1238_0548 | p888 | 0.1 mM                           |
| Vmax_0549   | p889 | 0.5978097982 mM·s <sup>-1</sup>  |
| Keq_0549    | p890 | 2                                |
| Km0373_0549 | p891 | 0.1 mM                           |
| Km1014_0549 | p892 | 0.1 mM                           |
| Km0529_0549 | p893 | 0.1 mM                           |
| Km1233_0549 | p894 | 0.1 mM                           |
| Vmax_0550   | p895 | 0.1183117139 mM·s <sup>-1</sup>  |
| Keq_0550    | p896 | 20 mM <sup>-1</sup>              |
| Km0837_0550 | p897 | 0.1 mM                           |
| Km1616_0550 | p898 | 0.1 mM                           |
| Km1620_0550 | p899 | 0.1 mM                           |
| Vmax_0553   | p900 | 18.0455211578 mM·s <sup>-1</sup> |
| Keq_0553    | p901 | 0.2 mM                           |
| Km0033_0553 | p902 | 0.1 mM                           |
| Km0025_0553 | p903 | 0.1 mM                           |
| Km0750_0553 | p904 | 0.1 mM                           |
| Vmax_0558   | p905 | 0.3636483927 mM·s <sup>-1</sup>  |
| Keq_0558    | p906 | 0.2 mM                           |
| Km0218_0558 | p907 | 0.1 mM                           |

|             |      |                                 |
|-------------|------|---------------------------------|
| Km1212_0558 | p908 | 0.1 mM                          |
| Km0028_0558 | p909 | 0.1 mM                          |
| Km0529_0558 | p910 | 0.1 mM                          |
| Km1207_0558 | p911 | 0.1 mM                          |
| Vmax_0559   | p912 | 0.1106755978 mM·s <sup>-1</sup> |
| Keq_0559    | p913 | 2                               |
| Km0367_0559 | p914 | 0.1 mM                          |
| Km0373_0559 | p915 | 0.1 mM                          |
| Km0218_0559 | p916 | 0.1 mM                          |
| Km0529_0559 | p917 | 0.1 mM                          |
| Vmax_0563   | p918 | 0.3173700666 mM·s <sup>-1</sup> |
| Keq_0563    | p919 | 0.596 mM                        |
| Km0312_0563 | p920 | 0.1 mM                          |
| Km0999_0563 | p921 | 0.1 mM                          |
| Km0403_0563 | p922 | 0.1 mM                          |
| Km0550_0563 | p923 | 0.1 mM                          |
| Km0991_0563 | p924 | 0.298 mM                        |
| Vmax_0564   | p925 | 0.0865554727 mM·s <sup>-1</sup> |
| Keq_0564    | p926 | 2                               |
| Km0550_0564 | p927 | 0.1 mM                          |
| Km0207_0564 | p928 | 0.1 mM                          |
| Vmax_0565   | p929 | 0.1463018303 mM·s <sup>-1</sup> |
| Keq_0565    | p930 | 0.0349654321                    |
| Km0849_0565 | p931 | 0.162 mM                        |
| Km1198_0565 | p932 | 1.5 mM                          |
| Km1203_0565 | p933 | 0.0867 mM                       |
| Km1565_0565 | p934 | 0.049 mM                        |
| Vmax_0566   | p935 | 0.3067913892 mM·s <sup>-1</sup> |
| Keq_0566    | p936 | 0.2 mM                          |
| Km0076_0566 | p937 | 0.1 mM                          |
| Km0086_0566 | p938 | 0.1 mM                          |
| Km0456_0566 | p939 | 0.1 mM                          |
| Vmax_0568   | p940 | 6.6911327679 mM·s <sup>-1</sup> |
| Keq_0568    | p941 | 0.2 mM                          |
| Km0633_0568 | p942 | 0.1 mM                          |
| Km1322_0568 | p943 | 0.1 mM                          |
| Vmax_0570   | p944 | 0.2122571005 mM·s <sup>-1</sup> |
| Keq_0570    | p945 | 3.24                            |
| Km1365_0570 | p946 | 0.1 mM                          |
| Km0849_0570 | p947 | 0.162 mM                        |
| Vmax_0594   | p948 | 0.0014504293 mM·s <sup>-1</sup> |
| Keq_0594    | p949 | 2                               |
| Km0089_0594 | p950 | 0.1 mM                          |
| Km0499_0594 | p951 | 0.1 mM                          |
| Km0619_0594 | p952 | 0.1 mM                          |
| Km0918_0594 | p953 | 0.1 mM                          |
| Vmax_0658   | p954 | 2.2004324618 mM·s <sup>-1</sup> |
| Keq_0658    | p955 | 0.02023 mM                      |
| Km0940_0658 | p956 | 0.1 mM                          |
| Km1198_0658 | p957 | 1.5 mM                          |
| Km0180_0658 | p958 | 0.175 mM                        |
| Km0456_0658 | p959 | 0.1 mM                          |
| Km1203_0658 | p960 | 0.0867 mM                       |
| Vmax_0661   | p961 | 2.2004324618 mM·s <sup>-1</sup> |

|             |       |                                  |
|-------------|-------|----------------------------------|
| Keq_0661    | p962  | 0.35 mM                          |
| Km0940_0661 | p963  | 0.1 mM                           |
| Km1207_0661 | p964  | 0.1 mM                           |
| Km0180_0661 | p965  | 0.175 mM                         |
| Km0456_0661 | p966  | 0.1 mM                           |
| Km1212_0661 | p967  | 0.1 mM                           |
| Vmax_0663   | p968  | 0.4631679518 mM·s <sup>-1</sup>  |
| Keq_0663    | p969  | 1.1744966443                     |
| Km0056_0663 | p970  | 0.1 mM                           |
| Km0991_0663 | p971  | 0.298 mM                         |
| Km0180_0663 | p972  | 0.175 mM                         |
| Km1016_0663 | p973  | 0.1 mM                           |
| Vmax_0667   | p974  | 0.0158107997 mM·s <sup>-1</sup>  |
| Keq_0667    | p975  | 2                                |
| Km0943_0667 | p976  | 0.1 mM                           |
| Km1376_0667 | p977  | 0.1 mM                           |
| Vmax_0669   | p978  | 0.4631679518 mM·s <sup>-1</sup>  |
| Keq_0669    | p979  | 2                                |
| Km0039_0669 | p980  | 0.1 mM                           |
| Km1212_0669 | p981  | 0.1 mM                           |
| Km0008_0669 | p982  | 0.1 mM                           |
| Km1207_0669 | p983  | 0.1 mM                           |
| Vmax_0670   | p984  | 0.2529346506 mM·s <sup>-1</sup>  |
| Keq_0670    | p985  | 0.01906 mM                       |
| Km1020_0670 | p986  | 0.1 mM                           |
| Km0427_0670 | p987  | 0.1 mM                           |
| Km0955_0670 | p988  | 0.00953 mM                       |
| Vmax_0674   | p989  | 0.6072342727 mM·s <sup>-1</sup>  |
| Keq_0674    | p990  | 0.021239                         |
| Km0991_0674 | p991  | 0.298 mM                         |
| Km1399_0674 | p992  | 0.527 mM                         |
| Km0180_0674 | p993  | 0.175 mM                         |
| Km0955_0674 | p994  | 0.00953 mM                       |
| Vmax_0678   | p995  | 0.643588026 mM·s <sup>-1</sup>   |
| Keq_0678    | p996  | 2                                |
| Km0953_0678 | p997  | 0.1 mM                           |
| Km1212_0678 | p998  | 0.1 mM                           |
| Km0959_0678 | p999  | 0.1 mM                           |
| Km1207_0678 | p1000 | 0.1 mM                           |
| Vmax_0688   | p1001 | 13.9503755002 mM·s <sup>-1</sup> |
| Keq_0688    | p1002 | 2                                |
| Km1151_0688 | p1003 | 0.1 mM                           |
| Km1212_0688 | p1004 | 0.1 mM                           |
| Km0062_0688 | p1005 | 0.1 mM                           |
| Km1207_0688 | p1006 | 0.1 mM                           |
| Vmax_0694   | p1007 | 0.2529346506 mM·s <sup>-1</sup>  |
| Keq_0694    | p1008 | 20 mM <sup>-1</sup>              |
| Km1048_0694 | p1009 | 0.1 mM                           |
| Km1275_0694 | p1010 | 0.1 mM                           |
| Km1195_0694 | p1011 | 0.1 mM                           |
| Vmax_0696   | p1012 | 13.9503755002 mM·s <sup>-1</sup> |
| Keq_0696    | p1013 | 0.1156                           |
| Km0062_0696 | p1014 | 0.1 mM                           |
| Km1198_0696 | p1015 | 1.5 mM                           |



|             |       |                                  |
|-------------|-------|----------------------------------|
| Km0063_0696 | p1016 | 0.1 mM                           |
| Km1203_0696 | p1017 | 0.0867 mM                        |
| Vmax_0697   | p1018 | 18.0455211578 mM·s <sup>-1</sup> |
| Keq_0697    | p1019 | 20 mM <sup>-1</sup>              |
| Km0750_0697 | p1020 | 0.1 mM                           |
| Km1151_0697 | p1021 | 0.1 mM                           |
| Km0033_0697 | p1022 | 0.1 mM                           |
| Vmax_0698   | p1023 | 0.0079053998 mM·s <sup>-1</sup>  |
| Keq_0698    | p1024 | 2                                |
| Km0037_0698 | p1025 | 0.1 mM                           |
| Km1059_0698 | p1026 | 0.1 mM                           |
| Vmax_0699   | p1027 | 0.6732092322 mM·s <sup>-1</sup>  |
| Keq_0699    | p1028 | 1.1744966443                     |
| Km0291_0699 | p1029 | 0.1 mM                           |
| Km0991_0699 | p1030 | 0.298 mM                         |
| Km0180_0699 | p1031 | 0.175 mM                         |
| Km1021_0699 | p1032 | 0.1 mM                           |
| Vmax_0713   | p1033 | 1.0084943582 mM·s <sup>-1</sup>  |
| Keq_0713    | p1034 | 0.1156                           |
| Km0066_0713 | p1035 | 0.1 mM                           |
| Km1198_0713 | p1036 | 1.5 mM                           |
| Km1203_0713 | p1037 | 0.0867 mM                        |
| Km1271_0713 | p1038 | 0.1 mM                           |
| Vmax_0722   | p1039 | 2.2108191185 mM·s <sup>-1</sup>  |
| Keq_0722    | p1040 | 0.2051282051                     |
| Km0573_0722 | p1041 | 0.1 mM                           |
| Km0785_0722 | p1042 | 0.975 mM                         |
| Km0633_0722 | p1043 | 0.1 mM                           |
| Km0743_0722 | p1044 | 0.1 mM                           |
| Vmax_0723   | p1045 | 0.9474939079 mM·s <sup>-1</sup>  |
| Keq_0723    | p1046 | 3.3955857385                     |
| Km0557_0723 | p1047 | 0.0589 mM                        |
| Km0574_0723 | p1048 | 0.1 mM                           |
| Vmax_0724   | p1049 | 0.4211708517 mM·s <sup>-1</sup>  |
| Keq_0724    | p1050 | 2                                |
| Km0304_0724 | p1051 | 0.1 mM                           |
| Km0120_0724 | p1052 | 0.1 mM                           |
| Vmax_0726   | p1053 | 0.0651116429 mM·s <sup>-1</sup>  |
| Keq_0726    | p1054 | 0.0046620047 mM                  |
| Km0434_0726 | p1055 | 4.29 mM                          |
| Km1029_0726 | p1056 | 0.1 mM                           |
| Km0633_0726 | p1057 | 0.1 mM                           |
| Km1322_0726 | p1058 | 0.1 mM                           |
| Km1416_0726 | p1059 | 0.1 mM                           |
| Vmax_0727   | p1060 | 0.1760765283 mM·s <sup>-1</sup>  |
| Keq_0727    | p1061 | 2                                |
| Km0322_0727 | p1062 | 0.1 mM                           |
| Km1012_0727 | p1063 | 0.1 mM                           |
| Km1029_0727 | p1064 | 0.1 mM                           |
| Km1487_0727 | p1065 | 0.1 mM                           |
| Vmax_0731   | p1066 | 0.4913659937 mM·s <sup>-1</sup>  |
| Keq_0731    | p1067 | 0.1156                           |
| Km0306_0731 | p1068 | 0.1 mM                           |
| Km1198_0731 | p1069 | 1.5 mM                           |

|             |       |                                 |
|-------------|-------|---------------------------------|
| Km0304_0731 | p1070 | 0.1 mM                          |
| Km1203_0731 | p1071 | 0.0867 mM                       |
| Vmax_0732   | p1072 | 0.4913659936 mM·s <sup>-1</sup> |
| Keq_0732    | p1073 | 2                               |
| Km0306_0732 | p1074 | 0.1 mM                          |
| Km1207_0732 | p1075 | 0.1 mM                          |
| Km0304_0732 | p1076 | 0.1 mM                          |
| Km1212_0732 | p1077 | 0.1 mM                          |
| Vmax_0736   | p1078 | 0.1106755978 mM·s <sup>-1</sup> |
| Keq_0736    | p1079 | 2                               |
| Km0028_0736 | p1080 | 0.1 mM                          |
| Km0539_0736 | p1081 | 0.1 mM                          |
| Km0019_0736 | p1082 | 0.1 mM                          |
| Km0467_0736 | p1083 | 0.1 mM                          |
| Vmax_0739   | p1084 | 0.300405194 mM·s <sup>-1</sup>  |
| Keq_0739    | p1085 | 0.006013986 mM_squared          |
| Km0018_0739 | p1086 | 0.1 mM                          |
| Km0434_0739 | p1087 | 4.29 mM                         |
| Km0394_0739 | p1088 | 1.29 mM                         |
| Km0456_0739 | p1089 | 0.1 mM                          |
| Km0943_0739 | p1090 | 0.1 mM                          |
| Km1322_0739 | p1091 | 0.1 mM                          |
| Vmax_0757   | p1092 | 0.003978907 mM·s <sup>-1</sup>  |
| Keq_0757    | p1093 | 0.2 mM                          |
| Km0126_0757 | p1094 | 0.1 mM                          |
| Km1153_0757 | p1095 | 0.1 mM                          |
| Km1322_0757 | p1096 | 0.1 mM                          |
| Vmax_0758   | p1097 | 0.0023873442 mM·s <sup>-1</sup> |
| Keq_0758    | p1098 | 1.0362694301                    |
| Km0568_0758 | p1099 | 0.193 mM                        |
| Km0126_0758 | p1100 | 0.1 mM                          |
| Vmax_0759   | p1101 | 0.5754977208 mM·s <sup>-1</sup> |
| Keq_0759    | p1102 | 0.2 mM                          |
| Km1191_0759 | p1103 | 0.1 mM                          |
| Km1212_0759 | p1104 | 0.1 mM                          |
| Km0145_0759 | p1105 | 0.1 mM                          |
| Km1207_0759 | p1106 | 0.1 mM                          |
| Km1322_0759 | p1107 | 0.1 mM                          |
| Vmax_0762   | p1108 | 0.2529346506 mM·s <sup>-1</sup> |
| Keq_0762    | p1109 | 0.2 mM                          |
| Km1195_0762 | p1110 | 0.1 mM                          |
| Km0722_0762 | p1111 | 0.1 mM                          |
| Km1020_0762 | p1112 | 0.1 mM                          |
| Vmax_0770   | p1113 | 0.4426356386 mM·s <sup>-1</sup> |
| Keq_0770    | p1114 | 34.6020761246                   |
| Km1203_0770 | p1115 | 0.0867 mM                       |
| Km1537_0770 | p1116 | 0.1 mM                          |
| Km1198_0770 | p1117 | 1.5 mM                          |
| Km1535_0770 | p1118 | 0.1 mM                          |
| Vmax_0792   | p1119 | 0.0845961934 mM·s <sup>-1</sup> |
| Keq_0792    | p1120 | 0.2 mM                          |
| Km0467_0792 | p1121 | 0.1 mM                          |
| Km0526_0792 | p1122 | 0.1 mM                          |
| Km1322_0792 | p1123 | 0.1 mM                          |

|             |       |                                 |
|-------------|-------|---------------------------------|
| Vmax_0800   | p1124 | 2.5622074094 mM·s <sup>-1</sup> |
| Keq_0800    | p1125 | 5.8636363636                    |
| Km0434_0800 | p1126 | 4.29 mM                         |
| Km0739_0800 | p1127 | 0.1 mM                          |
| Km0394_0800 | p1128 | 1.29 mM                         |
| Km0785_0800 | p1129 | 0.975 mM                        |
| Vmax_0806   | p1130 | 0.0078791928 mM·s <sup>-1</sup> |
| Keq_0806    | p1131 | 0.2 mM                          |
| Km0539_0806 | p1132 | 0.1 mM                          |
| Km0467_0806 | p1133 | 0.1 mM                          |
| Km1322_0806 | p1134 | 0.1 mM                          |
| Vmax_0811   | p1135 | 4.7902015737 mM·s <sup>-1</sup> |
| Keq_0811    | p1136 | 1.3840698309                    |
| Km0434_0811 | p1137 | 4.29 mM                         |
| Km1538_0811 | p1138 | 0.282 mM                        |
| Km0394_0811 | p1139 | 1.29 mM                         |
| Km1559_0811 | p1140 | 0.649 mM                        |
| Vmax_0813   | p1141 | 0.1924031986 mM·s <sup>-1</sup> |
| Keq_0813    | p1142 | 1116                            |
| Km0841_0813 | p1143 | 0.1 mM                          |
| Km1233_0813 | p1144 | 0.1 mM                          |
| Km0362_0813 | p1145 | 55.8 mM                         |
| Km1012_0813 | p1146 | 0.1 mM                          |
| Vmax_0816   | p1147 | 0.3662258223 mM·s <sup>-1</sup> |
| Keq_0816    | p1148 | 2                               |
| Km0455_0816 | p1149 | 0.1 mM                          |
| Km1266_0816 | p1150 | 0.1 mM                          |
| Km0979_0816 | p1151 | 0.1 mM                          |
| Km1322_0816 | p1152 | 0.1 mM                          |
| Vmax_0818   | p1153 | 0.3662258223 mM·s <sup>-1</sup> |
| Keq_0818    | p1154 | 0.6711409396                    |
| Km0991_0818 | p1155 | 0.298 mM                        |
| Km1182_0818 | p1156 | 0.1 mM                          |
| Km1192_0818 | p1157 | 0.1 mM                          |
| Km1266_0818 | p1158 | 0.1 mM                          |
| Vmax_0820   | p1159 | 0.331272799 mM·s <sup>-1</sup>  |
| Keq_0820    | p1160 | 2                               |
| Km1269_0820 | p1161 | 0.1 mM                          |
| Km1386_0820 | p1162 | 0.1 mM                          |
| Km0633_0820 | p1163 | 0.1 mM                          |
| Km1270_0820 | p1164 | 0.1 mM                          |
| Vmax_0821   | p1165 | 0.2366234278 mM·s <sup>-1</sup> |
| Keq_0821    | p1166 | 0.2 mM                          |
| Km1270_0821 | p1167 | 0.1 mM                          |
| Km0456_0821 | p1168 | 0.1 mM                          |
| Km1545_0821 | p1169 | 0.1 mM                          |
| Vmax_0851   | p1170 | 0.3069834099 mM·s <sup>-1</sup> |
| Keq_0851    | p1171 | 1.1744966443                    |
| Km0951_0851 | p1172 | 0.1 mM                          |
| Km0991_0851 | p1173 | 0.298 mM                        |
| Km0180_0851 | p1174 | 0.175 mM                        |
| Km1032_0851 | p1175 | 0.1 mM                          |
| Vmax_0855   | p1176 | 0.4609059687 mM·s <sup>-1</sup> |
| Keq_0855    | p1177 | 0.0601398601 mM                 |

|             |       |                                  |
|-------------|-------|----------------------------------|
| Km0302.0855 | p1178 | 0.1 mM                           |
| Km0434.0855 | p1179 | 4.29 mM                          |
| Km0300.0855 | p1180 | 0.1 mM                           |
| Km0394.0855 | p1181 | 1.29 mM                          |
| Km1322.0855 | p1182 | 0.1 mM                           |
| Vmax.0858   | p1183 | 0.0077553704 mM·s <sup>-1</sup>  |
| Keq_0858    | p1184 | 2                                |
| Km1351.0858 | p1185 | 0.1 mM                           |
| Km1416.0858 | p1186 | 0.1 mM                           |
| Km1343.0858 | p1187 | 0.1 mM                           |
| Km1413.0858 | p1188 | 0.1 mM                           |
| Vmax.0874   | p1189 | 0.0055704698 mM·s <sup>-1</sup>  |
| Keq_0874    | p1190 | 2                                |
| Km0471.0874 | p1191 | 0.1 mM                           |
| Km1153.0874 | p1192 | 0.1 mM                           |
| Km0089.0874 | p1193 | 0.1 mM                           |
| Km0526.0874 | p1194 | 0.1 mM                           |
| Vmax.0877   | p1195 | 0.0068801984 mM·s <sup>-1</sup>  |
| Keq_0877    | p1196 | 0.2 mM                           |
| Km1337.0877 | p1197 | 0.1 mM                           |
| Km0456.0877 | p1198 | 0.1 mM                           |
| Km1351.0877 | p1199 | 0.1 mM                           |
| Vmax.0880   | p1200 | 0.0106367059 mM·s <sup>-1</sup>  |
| Keq_0880    | p1201 | 1                                |
| Km0471.0880 | p1202 | 0.1 mM                           |
| Km1039.0880 | p1203 | 0.2 mM                           |
| Km0526.0880 | p1204 | 0.1 mM                           |
| Km1337.0880 | p1205 | 0.1 mM                           |
| Vmax.0883   | p1206 | 0.3931157225 mM·s <sup>-1</sup>  |
| Keq_0883    | p1207 | 0.2 mM                           |
| Km0201.0883 | p1208 | 0.1 mM                           |
| Km1616.0883 | p1209 | 0.1 mM                           |
| Km0390.0883 | p1210 | 0.1 mM                           |
| Km1469.0883 | p1211 | 0.1 mM                           |
| Km1620.0883 | p1212 | 0.1 mM                           |
| Vmax.0886   | p1213 | 35.0101324198 mM·s <sup>-1</sup> |
| Keq_0886    | p1214 | 11.742077956                     |
| Km0434.0886 | p1215 | 4.29 mM                          |
| Km0557.0886 | p1216 | 0.0589 mM                        |
| Km0394.0886 | p1217 | 1.29 mM                          |
| Km0555.0886 | p1218 | 1.15 mM                          |
| Vmax.0887   | p1219 | 4.3906511702 mM·s <sup>-1</sup>  |
| Keq_0887    | p1220 | 0.6013986014                     |
| Km0434.0887 | p1221 | 4.29 mM                          |
| Km1427.0887 | p1222 | 0.1 mM                           |
| Km0394.0887 | p1223 | 1.29 mM                          |
| Km1426.0887 | p1224 | 0.1 mM                           |
| Vmax.0888   | p1225 | 1.9882923639 mM·s <sup>-1</sup>  |
| Keq_0888    | p1226 | 1.3989637306                     |
| Km0568.0888 | p1227 | 0.193 mM                         |
| Km0567.0888 | p1228 | 0.135 mM                         |
| Vmax.0889   | p1229 | 21.6709527908 mM·s <sup>-1</sup> |
| Keq_0889    | p1230 | 0.2 mM                           |
| Km0340.0889 | p1231 | 0.1 mM                           |

|             |       |                                  |
|-------------|-------|----------------------------------|
| Km1207_0889 | p1232 | 0.1 mM                           |
| Km0456_0889 | p1233 | 0.1 mM                           |
| Km0577_0889 | p1234 | 0.1 mM                           |
| Km1212_0889 | p1235 | 0.1 mM                           |
| Vmax_0891   | p1236 | 2.4095741643 mM·s <sup>-1</sup>  |
| Keq_0891    | p1237 | 0.0988034188                     |
| Km0260_0891 | p1238 | 0.117 mM                         |
| Km1198_0891 | p1239 | 1.5 mM                           |
| Km0258_0891 | p1240 | 0.1 mM                           |
| Km1203_0891 | p1241 | 0.0867 mM                        |
| Vmax_0892   | p1242 | 43.3131197144 mM·s <sup>-1</sup> |
| Keq_0892    | p1243 | 1055.8833738285                  |
| Km0075_0892 | p1244 | 0.000737 mM                      |
| Km0394_0892 | p1245 | 1.29 mM                          |
| Km0260_0892 | p1246 | 0.117 mM                         |
| Km0434_0892 | p1247 | 4.29 mM                          |
| Vmax_0893   | p1248 | 17.5300909501 mM·s <sup>-1</sup> |
| Keq_0893    | p1249 | 0.2888888889                     |
| Km0260_0893 | p1250 | 0.117 mM                         |
| Km0188_0893 | p1251 | 0.0169 mM                        |
| Vmax_0900   | p1252 | 0.0077553704 mM·s <sup>-1</sup>  |
| Keq_0900    | p1253 | 2                                |
| Km1342_0900 | p1254 | 0.1 mM                           |
| Km1416_0900 | p1255 | 0.1 mM                           |
| Km1346_0900 | p1256 | 0.1 mM                           |
| Km1413_0900 | p1257 | 0.1 mM                           |
| Vmax_0901   | p1258 | 0.0077553704 mM·s <sup>-1</sup>  |
| Keq_0901    | p1259 | 2                                |
| Km1343_0901 | p1260 | 0.1 mM                           |
| Km1416_0901 | p1261 | 0.1 mM                           |
| Km1342_0901 | p1262 | 0.1 mM                           |
| Km1413_0901 | p1263 | 0.1 mM                           |
| Vmax_0902   | p1264 | 0.9474939079 mM·s <sup>-1</sup>  |
| Keq_0902    | p1265 | 2                                |
| Km0574_0902 | p1266 | 0.1 mM                           |
| Km0573_0902 | p1267 | 0.1 mM                           |
| Vmax_0904   | p1268 | 0.1106755978 mM·s <sup>-1</sup>  |
| Keq_0904    | p1269 | 0.6013986014                     |
| Km0019_0904 | p1270 | 0.1 mM                           |
| Km0434_0904 | p1271 | 4.29 mM                          |
| Km0018_0904 | p1272 | 0.1 mM                           |
| Km0394_0904 | p1273 | 1.29 mM                          |
| Vmax_0908   | p1274 | 0.6285081392 mM·s <sup>-1</sup>  |
| Keq_0908    | p1275 | 0.6013986014                     |
| Km0434_0908 | p1276 | 4.29 mM                          |
| Km0973_0908 | p1277 | 0.1 mM                           |
| Km1364_0908 | p1278 | 0.1 mM                           |
| Km0299_0908 | p1279 | 0.1 mM                           |
| Km0394_0908 | p1280 | 1.29 mM                          |
| Km1322_0908 | p1281 | 0.1 mM                           |
| Vmax_0909   | p1282 | 0.0865554727 mM·s <sup>-1</sup>  |
| Keq_0909    | p1283 | 2                                |
| Km0078_0909 | p1284 | 0.1 mM                           |
| Km0077_0909 | p1285 | 0.1 mM                           |

|             |       |                                 |
|-------------|-------|---------------------------------|
| Vmax_0910   | p1286 | 0.1442591212 mM·s <sup>-1</sup> |
| Keq_0910    | p1287 | 0.2 mM                          |
| Km0326_0910 | p1288 | 0.1 mM                          |
| Km0078_0910 | p1289 | 0.1 mM                          |
| Km0633_0910 | p1290 | 0.1 mM                          |
| Vmax_0911   | p1291 | 0.6285081392 mM·s <sup>-1</sup> |
| Keq_0911    | p1292 | 0.6013986014                    |
| Km0300_0911 | p1293 | 0.1 mM                          |
| Km0456_0911 | p1294 | 0.1 mM                          |
| Km0434_0911 | p1295 | 4.29 mM                         |
| Km1364_0911 | p1296 | 0.1 mM                          |
| Km0394_0911 | p1297 | 1.29 mM                         |
| Km1322_0911 | p1298 | 0.1 mM                          |
| Vmax_0912   | p1299 | 0.4952665679 mM·s <sup>-1</sup> |
| Keq_0912    | p1300 | 2                               |
| Km0120_0912 | p1301 | 0.1 mM                          |
| Km0403_0912 | p1302 | 0.1 mM                          |
| Km1365_0912 | p1303 | 0.1 mM                          |
| Km1487_0912 | p1304 | 0.1 mM                          |
| Vmax_0913   | p1305 | 0.1840748335 mM·s <sup>-1</sup> |
| Keq_0913    | p1306 | 2                               |
| Km1187_0913 | p1307 | 0.1 mM                          |
| Km0076_0913 | p1308 | 0.1 mM                          |
| Vmax_0914   | p1309 | 0.6285081392 mM·s <sup>-1</sup> |
| Keq_0914    | p1310 | 0.3084095392                    |
| Km0327_0914 | p1311 | 0.1 mM                          |
| Km0434_0914 | p1312 | 4.29 mM                         |
| Km1003_0914 | p1313 | 0.195 mM                        |
| Km0325_0914 | p1314 | 0.1 mM                          |
| Km0394_0914 | p1315 | 1.29 mM                         |
| Km1322_0914 | p1316 | 0.1 mM                          |
| Vmax_0915   | p1317 | 0.4609059687 mM·s <sup>-1</sup> |
| Keq_0915    | p1318 | 0.596 mM                        |
| Km0999_0915 | p1319 | 0.1 mM                          |
| Km1386_0915 | p1320 | 0.1 mM                          |
| Km0327_0915 | p1321 | 0.1 mM                          |
| Km0633_0915 | p1322 | 0.1 mM                          |
| Km0991_0915 | p1323 | 0.298 mM                        |
| Vmax_0916   | p1324 | 1.2560473118 mM·s <sup>-1</sup> |
| Keq_0916    | p1325 | 0.2051282051                    |
| Km0434_0916 | p1326 | 4.29 mM                         |
| Km1408_0916 | p1327 | 0.1 mM                          |
| Km0423_0916 | p1328 | 0.44 mM                         |
| Km1386_0916 | p1329 | 0.1 mM                          |
| Vmax_0917   | p1330 | 1.7211244031 mM·s <sup>-1</sup> |
| Keq_0917    | p1331 | 13.4228187919 mM                |
| Km0259_0917 | p1332 | 0.00298 mM                      |
| Km1039_0917 | p1333 | 0.2 mM                          |
| Km1322_0917 | p1334 | 0.1 mM                          |
| Vmax_0918   | p1335 | 2.4095741643 mM·s <sup>-1</sup> |
| Keq_0918    | p1336 | 0.035                           |
| Km0258_0918 | p1337 | 0.1 mM                          |
| Km0991_0918 | p1338 | 0.298 mM                        |
| Km0180_0918 | p1339 | 0.175 mM                        |

|             |       |                                  |
|-------------|-------|----------------------------------|
| Km0259_0918 | p1340 | 0.00298 mM                       |
| Vmax_0919   | p1341 | 0.0005180105 mM·s <sup>-1</sup>  |
| Keq_0919    | p1342 | 20 mM <sup>-1</sup>              |
| Km1084_0919 | p1343 | 0.1 mM                           |
| Km1366_0919 | p1344 | 0.1 mM                           |
| Km0481_0919 | p1345 | 0.1 mM                           |
| Vmax_0922   | p1346 | 0.001139623 mM·s <sup>-1</sup>   |
| Keq_0922    | p1347 | 20 mM <sup>-1</sup>              |
| Km1212_0922 | p1348 | 0.1 mM                           |
| Km1275_0922 | p1349 | 0.1 mM                           |
| Km1445_0922 | p1350 | 0.1 mM                           |
| Km1207_0922 | p1351 | 0.1 mM                           |
| Km1366_0922 | p1352 | 0.1 mM                           |
| Vmax_0938   | p1353 | 0.2192738642 mM·s <sup>-1</sup>  |
| Keq_0938    | p1354 | 0.2 mM                           |
| Km1377_0938 | p1355 | 0.1 mM                           |
| Km0456_0938 | p1356 | 0.1 mM                           |
| Km0951_0938 | p1357 | 0.1 mM                           |
| Vmax_0939   | p1358 | 0.4083494857 mM·s <sup>-1</sup>  |
| Keq_0939    | p1359 | 0.2 mM                           |
| Km1207_0939 | p1360 | 0.1 mM                           |
| Km1377_0939 | p1361 | 0.1 mM                           |
| Km0204_0939 | p1362 | 0.1 mM                           |
| Km0456_0939 | p1363 | 0.1 mM                           |
| Km1212_0939 | p1364 | 0.1 mM                           |
| Vmax_0957   | p1365 | 0.3473759638 mM·s <sup>-1</sup>  |
| Keq_0957    | p1366 | 2                                |
| Km0118_0957 | p1367 | 0.1 mM                           |
| Km1212_0957 | p1368 | 0.1 mM                           |
| Km1035_0957 | p1369 | 0.1 mM                           |
| Km1207_0957 | p1370 | 0.1 mM                           |
| Vmax_0958   | p1371 | 11.1138381034 mM·s <sup>-1</sup> |
| Keq_0958    | p1372 | 0.1141173817                     |
| Km0434_0958 | p1373 | 4.29 mM                          |
| Km0445_0958 | p1374 | 0.1 mM                           |
| Km1399_0958 | p1375 | 0.527 mM                         |
| Km0394_0958 | p1376 | 1.29 mM                          |
| Km1271_0958 | p1377 | 0.1 mM                           |
| Km1322_0958 | p1378 | 0.1 mM                           |
| Vmax_0959   | p1379 | 45.7829965006 mM·s <sup>-1</sup> |
| Keq_0959    | p1380 | 0.0675521822 mM                  |
| Km1399_0959 | p1381 | 0.527 mM                         |
| Km0359_0959 | p1382 | 0.178 mM                         |
| Km0456_0959 | p1383 | 0.1 mM                           |
| Vmax_0961   | p1384 | 12.4820895805 mM·s <sup>-1</sup> |
| Keq_0961    | p1385 | 0.0219354839                     |
| Km0529_0961 | p1386 | 0.1 mM                           |
| Km1198_0961 | p1387 | 1.5 mM                           |
| Km1399_0961 | p1388 | 0.527 mM                         |
| Km0373_0961 | p1389 | 0.1 mM                           |
| Km0456_0961 | p1390 | 0.1 mM                           |
| Km1203_0961 | p1391 | 0.0867 mM                        |
| Vmax_0962   | p1392 | 39.6190623352 mM·s <sup>-1</sup> |
| Keq_0962    | p1393 | 22.9095607235                    |

|             |       |                                 |
|-------------|-------|---------------------------------|
| Km0394_0962 | p1394 | 1.29 mM                         |
| Km1360_0962 | p1395 | 0.153 mM                        |
| Km0434_0962 | p1396 | 4.29 mM                         |
| Km1399_0962 | p1397 | 0.527 mM                        |
| Vmax_0967   | p1398 | 0.0048471065 mM·s <sup>-1</sup> |
| Keq_0967    | p1399 | 2                               |
| Km0158_0967 | p1400 | 0.1 mM                          |
| Km0314_0967 | p1401 | 0.1 mM                          |
| Km0328_0967 | p1402 | 0.1 mM                          |
| Km1322_0967 | p1403 | 0.1 mM                          |
| Vmax_0968   | p1404 | 0.0024235532 mM·s <sup>-1</sup> |
| Keq_0968    | p1405 | 2                               |
| Km0328_0968 | p1406 | 0.1 mM                          |
| Km0314_0968 | p1407 | 0.1 mM                          |
| Km1405_0968 | p1408 | 0.1 mM                          |
| Vmax_0970   | p1409 | 0.0044835735 mM·s <sup>-1</sup> |
| Keq_0970    | p1410 | 0.0815850816                    |
| Km0434_0970 | p1411 | 4.29 mM                         |
| Km1616_0970 | p1412 | 0.1 mM                          |
| Km0586_0970 | p1413 | 0.175 mM                        |
| Km1620_0970 | p1414 | 0.1 mM                          |
| Vmax_0973   | p1415 | 0.0129390814 mM·s <sup>-1</sup> |
| Keq_0973    | p1416 | 0.3081664099                    |
| Km1559_0973 | p1417 | 0.649 mM                        |
| Km1616_0973 | p1418 | 0.1 mM                          |
| Km0656_0973 | p1419 | 0.1 mM                          |
| Km1620_0973 | p1420 | 0.1 mM                          |
| Vmax_0974   | p1421 | 0.0051837111 mM·s <sup>-1</sup> |
| Keq_0974    | p1422 | 0.1550387597                    |
| Km0394_0974 | p1423 | 1.29 mM                         |
| Km1616_0974 | p1424 | 0.1 mM                          |
| Km0582_0974 | p1425 | 0.1 mM                          |
| Km1620_0974 | p1426 | 0.1 mM                          |
| Vmax_0976   | p1427 | 0.0032717969 mM·s <sup>-1</sup> |
| Keq_0976    | p1428 | 2                               |
| Km0467_0976 | p1429 | 0.1 mM                          |
| Km1616_0976 | p1430 | 0.1 mM                          |
| Km0587_0976 | p1431 | 0.1 mM                          |
| Km1620_0976 | p1432 | 0.1 mM                          |
| Vmax_0978   | p1433 | 0.0065435937 mM·s <sup>-1</sup> |
| Keq_0978    | p1434 | 2                               |
| Km0739_0978 | p1435 | 0.1 mM                          |
| Km1616_0978 | p1436 | 0.1 mM                          |
| Km0613_0978 | p1437 | 0.1 mM                          |
| Km1620_0978 | p1438 | 0.1 mM                          |
| Vmax_0982   | p1439 | 2.4200136351 mM·s <sup>-1</sup> |
| Keq_0982    | p1440 | 2                               |
| Km0577_0982 | p1441 | 0.1 mM                          |
| Km1408_0982 | p1442 | 0.1 mM                          |
| Vmax_0984   | p1443 | 3.4881688855 mM·s <sup>-1</sup> |
| Keq_0984    | p1444 | 2                               |
| Km0577_0984 | p1445 | 0.1 mM                          |
| Km0581_0984 | p1446 | 0.1 mM                          |
| Vmax_0986   | p1447 | 0.0181685708 mM·s <sup>-1</sup> |



|             |       |                                 |
|-------------|-------|---------------------------------|
| Keq_0986    | p1448 | 2                               |
| Km1416_0986 | p1449 | 0.1 mM                          |
| Km1569_0986 | p1450 | 0.1 mM                          |
| Km0700_0986 | p1451 | 0.1 mM                          |
| Km1413_0986 | p1452 | 0.1 mM                          |
| Vmax_0988   | p1453 | 1.0113526123 mM·s <sup>-1</sup> |
| Keq_0988    | p1454 | 0.02023 mM                      |
| Km1038_0988 | p1455 | 0.1 mM                          |
| Km1198_0988 | p1456 | 1.5 mM                          |
| Km0180_0988 | p1457 | 0.175 mM                        |
| Km1025_0988 | p1458 | 0.1 mM                          |
| Km1203_0988 | p1459 | 0.0867 mM                       |
| Vmax_0989   | p1460 | 1.0113526123 mM·s <sup>-1</sup> |
| Keq_0989    | p1461 | 6.711409396 mM <sup>-1</sup>    |
| Km0959_0989 | p1462 | 0.1 mM                          |
| Km0991_0989 | p1463 | 0.298 mM                        |
| Km1212_0989 | p1464 | 0.1 mM                          |
| Km1038_0989 | p1465 | 0.1 mM                          |
| Km1207_0989 | p1466 | 0.1 mM                          |
| Vmax_0990   | p1467 | 3.1361794073 mM·s <sup>-1</sup> |
| Keq_0990    | p1468 | 0.58 mM                         |
| Km1426_0990 | p1469 | 0.1 mM                          |
| Km0551_0990 | p1470 | 0.1 mM                          |
| Km0629_0990 | p1471 | 0.29 mM                         |
| Vmax_0992   | p1472 | 0.0577613521 mM·s <sup>-1</sup> |
| Keq_0992    | p1473 | 1                               |
| Km0373_0992 | p1474 | 0.1 mM                          |
| Km1039_0992 | p1475 | 0.2 mM                          |
| Km0529_0992 | p1476 | 0.1 mM                          |
| Km1234_0992 | p1477 | 0.1 mM                          |
| Vmax_0993   | p1478 | 0.002279246 mM·s <sup>-1</sup>  |
| Keq_0993    | p1479 | 0.1 mM                          |
| Km1039_0993 | p1480 | 0.2 mM                          |
| Km1302_0993 | p1481 | 0.1 mM                          |
| Km0231_0993 | p1482 | 0.1 mM                          |
| Km0456_0993 | p1483 | 0.1 mM                          |
| Km0529_0993 | p1484 | 0.1 mM                          |
| Vmax_0996   | p1485 | 0.6422416075 mM·s <sup>-1</sup> |
| Keq_0996    | p1486 | 2                               |
| Km0211_0996 | p1487 | 0.1 mM                          |
| Km1212_0996 | p1488 | 0.1 mM                          |
| Km1207_0996 | p1489 | 0.1 mM                          |
| Km1429_0996 | p1490 | 0.1 mM                          |
| Vmax_0997   | p1491 | 0.6422416075 mM·s <sup>-1</sup> |
| Keq_0997    | p1492 | 0.6013986014                    |
| Km0434_0997 | p1493 | 4.29 mM                         |
| Km1429_0997 | p1494 | 0.1 mM                          |
| Km0261_0997 | p1495 | 0.1 mM                          |
| Km0394_0997 | p1496 | 1.29 mM                         |
| Vmax_1010   | p1497 | 0.014493233 mM·s <sup>-1</sup>  |
| Keq_1010    | p1498 | 346.0207612457 mM <sup>-1</sup> |
| Km1203_1010 | p1499 | 0.0867 mM                       |
| Km1275_1010 | p1500 | 0.1 mM                          |
| Km1447_1010 | p1501 | 0.1 mM                          |

|             |       |                                 |
|-------------|-------|---------------------------------|
| Km0037_1010 | p1502 | 0.1 mM                          |
| Km1198_1010 | p1503 | 1.5 mM                          |
| Vmax_1011   | p1504 | 0.014493233 mM·s <sup>-1</sup>  |
| Keq_1011    | p1505 | 20 mM <sup>-1</sup>             |
| Km1212_1011 | p1506 | 0.1 mM                          |
| Km1275_1011 | p1507 | 0.1 mM                          |
| Km1447_1011 | p1508 | 0.1 mM                          |
| Km0037_1011 | p1509 | 0.1 mM                          |
| Km1207_1011 | p1510 | 0.1 mM                          |
| Vmax_1012   | p1511 | 0.0606080654 mM·s <sup>-1</sup> |
| Keq_1012    | p1512 | 0.2 mM                          |
| Km0190_1012 | p1513 | 0.1 mM                          |
| Km1212_1012 | p1514 | 0.1 mM                          |
| Km0633_1012 | p1515 | 0.1 mM                          |
| Km1207_1012 | p1516 | 0.1 mM                          |
| Km1447_1012 | p1517 | 0.1 mM                          |
| Vmax_1014   | p1518 | 0.0015618454 mM·s <sup>-1</sup> |
| Keq_1014    | p1519 | 20 mM <sup>-1</sup>             |
| Km0666_1014 | p1520 | 0.1 mM                          |
| Km0595_1014 | p1521 | 0.1 mM                          |
| Km0672_1014 | p1522 | 0.1 mM                          |
| Vmax_1026   | p1523 | 0.2501645507 mM·s <sup>-1</sup> |
| Keq_1026    | p1524 | 0.1550387597                    |
| Km0394_1026 | p1525 | 1.29 mM                         |
| Km1467_1026 | p1526 | 0.1 mM                          |
| Km0298_1026 | p1527 | 0.1 mM                          |
| Km1322_1026 | p1528 | 0.1 mM                          |
| Vmax_1027   | p1529 | 1.1078715816 mM·s <sup>-1</sup> |
| Keq_1027    | p1530 | 2                               |
| Km1212_1027 | p1531 | 0.1 mM                          |
| Km1469_1027 | p1532 | 0.1 mM                          |
| Km0841_1027 | p1533 | 0.1 mM                          |
| Km1207_1027 | p1534 | 0.1 mM                          |
| Vmax_1038   | p1535 | 0.4482227068 mM·s <sup>-1</sup> |
| Keq_1038    | p1536 | 2                               |
| Km1212_1038 | p1537 | 0.1 mM                          |
| Km1620_1038 | p1538 | 0.1 mM                          |
| Km1207_1038 | p1539 | 0.1 mM                          |
| Km1616_1038 | p1540 | 0.1 mM                          |
| Vmax_1041   | p1541 | 0.378920625 mM·s <sup>-1</sup>  |
| Keq_1041    | p1542 | 0.354 mM                        |
| Km1238_1041 | p1543 | 0.1 mM                          |
| Km1045_1041 | p1544 | 0.177 mM                        |
| Km1322_1041 | p1545 | 0.1 mM                          |
| Vmax_1045   | p1546 | 0.0096672846 mM·s <sup>-1</sup> |
| Keq_1045    | p1547 | 2                               |
| Km0306_1045 | p1548 | 0.1 mM                          |
| Km0654_1045 | p1549 | 0.1 mM                          |
| Km0625_1045 | p1550 | 0.1 mM                          |
| Km0649_1045 | p1551 | 0.1 mM                          |
| Vmax_1049   | p1552 | 4.3906511702 mM·s <sup>-1</sup> |
| Keq_1049    | p1553 | 1.58                            |
| Km0581_1049 | p1554 | 0.1 mM                          |
| Km1408_1049 | p1555 | 0.1 mM                          |

|             |       |                                 |
|-------------|-------|---------------------------------|
| Km0764_1049 | p1556 | 0.079 mM                        |
| Km1427_1049 | p1557 | 0.1 mM                          |
| Vmax_1050   | p1558 | 3.7484095627 mM·s <sup>-1</sup> |
| Keq_1050    | p1559 | 0.93062                         |
| Km0551_1050 | p1560 | 0.1 mM                          |
| Km0581_1050 | p1561 | 0.1 mM                          |
| Km0557_1050 | p1562 | 0.0589 mM                       |
| Km0764_1050 | p1563 | 0.079 mM                        |
| Vmax_1051   | p1564 | 0.1228088458 mM·s <sup>-1</sup> |
| Keq_1051    | p1565 | 0.0385 mM                       |
| Km0409_1051 | p1566 | 0.02 mM                         |
| Km1322_1051 | p1567 | 0.1 mM                          |
| Km1520_1051 | p1568 | 0.00385 mM                      |
| Vmax_1052   | p1569 | 0.0255877212 mM·s <sup>-1</sup> |
| Keq_1052    | p1570 | 20 mM <sup>-1</sup>             |
| Km0619_1052 | p1571 | 0.1 mM                          |
| Km0595_1052 | p1572 | 0.1 mM                          |
| Km1524_1052 | p1573 | 0.1 mM                          |
| Vmax_1054   | p1574 | 0.1138205928 mM·s <sup>-1</sup> |
| Keq_1054    | p1575 | 7.3417721519                    |
| Km0764_1054 | p1576 | 0.079 mM                        |
| Km0629_1054 | p1577 | 0.29 mM                         |
| Vmax_1055   | p1578 | 0.4295079449 mM·s <sup>-1</sup> |
| Keq_1055    | p1579 | 0.79                            |
| Km0086_1055 | p1580 | 0.1 mM                          |
| Km1039_1055 | p1581 | 0.2 mM                          |
| Km0764_1055 | p1582 | 0.079 mM                        |
| Km1048_1055 | p1583 | 0.1 mM                          |
| Vmax_1063   | p1584 | 0.2598587636 mM·s <sup>-1</sup> |
| Keq_1063    | p1585 | 1.1744966443                    |
| Km0204_1063 | p1586 | 0.1 mM                          |
| Km0991_1063 | p1587 | 0.298 mM                        |
| Km0180_1063 | p1588 | 0.175 mM                        |
| Km1051_1063 | p1589 | 0.1 mM                          |
| Vmax_1072   | p1590 | 0.1508527248 mM·s <sup>-1</sup> |
| Keq_1072    | p1591 | 1.6959440559                    |
| Km0434_1072 | p1592 | 4.29 mM                         |
| Km1545_1072 | p1593 | 0.1 mM                          |
| Km0394_1072 | p1594 | 1.29 mM                         |
| Km1538_1072 | p1595 | 0.282 mM                        |
| Vmax_1084   | p1596 | 4.639348849 mM·s <sup>-1</sup>  |
| Keq_1084    | p1597 | 1.0660275067                    |
| Km0567_1084 | p1598 | 0.135 mM                        |
| Km1559_1084 | p1599 | 0.649 mM                        |
| Km0633_1084 | p1600 | 0.1 mM                          |
| Km1543_1084 | p1601 | 0.467 mM                        |
| Vmax_1087   | p1602 | 0.6920590907 mM·s <sup>-1</sup> |
| Keq_1087    | p1603 | 1.1744966443                    |
| Km0232_1087 | p1604 | 0.1 mM                          |
| Km0991_1087 | p1605 | 0.298 mM                        |
| Km0180_1087 | p1606 | 0.175 mM                        |
| Km1056_1087 | p1607 | 0.1 mM                          |
| Vmax_1106   | p1608 | 0.1586 mM·s <sup>-1</sup>       |
| Km0362_1106 | p1609 | 55.8 mM                         |

|             |       |                                  |
|-------------|-------|----------------------------------|
| Vmax_1115   | p1610 | 3.663578114 mM·s <sup>-1</sup>   |
| Km0420_1115 | p1611 | 1 mM                             |
| Km0419_1115 | p1612 | 0.1 mM                           |
| Vmax_1166   | p1613 | 11.4019052879 mM·s <sup>-1</sup> |
| Km0565_1166 | p1614 | 74 mM                            |
| Km0563_1166 | p1615 | 1.57 mM                          |
| Vmax_1172   | p1616 | 0.0622 mM·s <sup>-1</sup>        |
| Km0765_1172 | p1617 | 0.15 mM                          |
| Vmax_1244   | p1618 | 0.1519905285 mM·s <sup>-1</sup>  |
| Km1324_1244 | p1619 | 1 mM                             |
| Km1322_1244 | p1620 | 0.1 mM                           |
| Vmax_1266   | p1621 | 0.0723860213 mM·s <sup>-1</sup>  |
| Km1468_1266 | p1622 | 1 mM                             |
| Km1467_1266 | p1623 | 0.1 mM                           |
| Vmax_1664   | p1624 | 2.7017716655 mM·s <sup>-1</sup>  |
| Keq_1664    | p1625 | 2                                |
| Km0456_1664 | p1626 | 0.1 mM                           |
| Km0445_1664 | p1627 | 0.1 mM                           |
| Vmax_1697   | p1628 | 12.22 mM·s <sup>-1</sup>         |
| Km0456_1697 | p1629 | 0.1 mM                           |
| Vmax_1704   | p1630 | 0.0032717969 mM·s <sup>-1</sup>  |
| Keq_1704    | p1631 | 6.6511627907                     |
| Km0394_1704 | p1632 | 1.29 mM                          |
| Km0587_1704 | p1633 | 0.1 mM                           |
| Km0434_1704 | p1634 | 4.29 mM                          |
| Km0589_1704 | p1635 | 0.1 mM                           |
| Vmax_1729   | p1636 | 0.0096672846 mM·s <sup>-1</sup>  |
| Keq_1729    | p1637 | 6.6511627907                     |
| Km0394_1729 | p1638 | 1.29 mM                          |
| Km0582_1729 | p1639 | 0.1 mM                           |
| Km0434_1729 | p1640 | 4.29 mM                          |
| Km0584_1729 | p1641 | 0.1 mM                           |
| Vmax_1762   | p1642 | 9.12 mM·s <sup>-1</sup>          |
| Km0680_1762 | p1643 | 55.5 mM                          |
| Vmax_1936   | p1644 | 28.0100750866 mM·s <sup>-1</sup> |
| Keq_1936    | p1645 | 0.0689655172 mM                  |
| Km0629_1936 | p1646 | 0.29 mM                          |
| Km1151_1936 | p1647 | 0.1 mM                           |
| Km1322_1936 | p1648 | 0.1 mM                           |
| Vmax_1979   | p1649 | 4.9371638398 mM·s <sup>-1</sup>  |
| Km1277_1979 | p1650 | 1 mM                             |
| Km1275_1979 | p1651 | 0.1 mM                           |
| Vmax_2030   | p1652 | 0.0017311095 mM·s <sup>-1</sup>  |
| Keq_2030    | p1653 | 0.2 mM                           |
| Km0313_2030 | p1654 | 0.1 mM                           |
| Km0314_2030 | p1655 | 0.1 mM                           |
| Km1322_2030 | p1656 | 0.1 mM                           |
| Vmax_2079   | p1657 | 0.01556 mM·s <sup>-1</sup>       |
| Km1520_2079 | p1658 | 0.00385 mM                       |
| V0_2111     | p1659 | 0.1923454949 mM·s <sup>-1</sup>  |
| ic0002_2111 | p1660 | 0.1 mM                           |
| ep0002_2111 | p1661 | 1.14                             |
| ic0423_2111 | p1662 | 0.44 mM                          |
| ep0423_2111 | p1663 | 0.051                            |

|             |       |            |
|-------------|-------|------------|
| ic0434.2111 | p1664 | 4.29 mM    |
| ep0434.2111 | p1665 | 59.3       |
| ic0526.2111 | p1666 | 0.1 mM     |
| ep0526.2111 | p1667 | 0.05       |
| ic0584.2111 | p1668 | 0.1 mM     |
| ep0584.2111 | p1669 | 0.00359    |
| ic0589.2111 | p1670 | 0.1 mM     |
| ep0589.2111 | p1671 | 0.00243    |
| ic0615.2111 | p1672 | 0.1 mM     |
| ep0615.2111 | p1673 | 0.00243    |
| ic0649.2111 | p1674 | 0.1 mM     |
| ep0649.2111 | p1675 | 0.00359    |
| ic0773.2111 | p1676 | 0.1 mM     |
| ep0773.2111 | p1677 | 0.519      |
| ic0782.2111 | p1678 | 0.1 mM     |
| ep0782.2111 | p1679 | 0.051      |
| ic0955.2111 | p1680 | 0.00953 mM |
| ep0955.2111 | p1681 | 0.357      |
| ic0965.2111 | p1682 | 0.1 mM     |
| ep0965.2111 | p1683 | 0.136      |
| ic0969.2111 | p1684 | 0.1 mM     |
| ep0969.2111 | p1685 | 0.172      |
| ic0973.2111 | p1686 | 0.1 mM     |
| ep0973.2111 | p1687 | 0.172      |
| ic0981.2111 | p1688 | 0.1 mM     |
| ep0981.2111 | p1689 | 0.0429     |
| ic0991.2111 | p1690 | 0.298 mM   |
| ep0991.2111 | p1691 | 0.268      |
| ic0999.2111 | p1692 | 0.1 mM     |
| ep0999.2111 | p1693 | 0.268      |
| ic1003.2111 | p1694 | 0.195 mM   |
| ep1003.2111 | p1695 | 0.325      |
| ic1006.2111 | p1696 | 0.1 mM     |
| ep1006.2111 | p1697 | 0.075      |
| ic1016.2111 | p1698 | 0.1 mM     |
| ep1016.2111 | p1699 | 0.172      |
| ic1021.2111 | p1700 | 0.1 mM     |
| ep1021.2111 | p1701 | 0.25       |
| ic1025.2111 | p1702 | 0.1 mM     |
| ep1025.2111 | p1703 | 0.239      |
| ic1029.2111 | p1704 | 0.1 mM     |
| ep1029.2111 | p1705 | 0.05       |
| ic1032.2111 | p1706 | 0.1 mM     |
| ep1032.2111 | p1707 | 0.114      |
| ic1035.2111 | p1708 | 0.1 mM     |
| ep1035.2111 | p1709 | 0.129      |
| ic1039.2111 | p1710 | 0.2 mM     |
| ep1039.2111 | p1711 | 0.254      |
| ic1045.2111 | p1712 | 0.177 mM   |
| ep1045.2111 | p1713 | 0.197      |
| ic1048.2111 | p1714 | 0.1 mM     |
| ep1048.2111 | p1715 | 0.028      |
| ic1051.2111 | p1716 | 0.1 mM     |
| ep1051.2111 | p1717 | 0.0965     |

|             |       |                     |
|-------------|-------|---------------------|
| ic1056.2111 | p1718 | 0.1 mM              |
| ep1056.2111 | p1719 | 0.257               |
| ic1107.2111 | p1720 | 0.1 mM              |
| ep1107.2111 | p1721 | 0.821               |
| ic1405.2111 | p1722 | 0.1 mM              |
| ep1405.2111 | p1723 | 0.0009              |
| ic1467.2111 | p1724 | 0.1 mM              |
| ep1467.2111 | p1725 | 0.02                |
| ic1520.2111 | p1726 | 0.00385 mM          |
| ep1520.2111 | p1727 | 0.0234              |
| ic1545.2111 | p1728 | 0.1 mM              |
| ep1545.2111 | p1729 | 0.067               |
| ic0089.2111 | p1730 | 0.1 mM              |
| ep0089.2111 | p1731 | 0.00153             |
| ic0122.2111 | p1732 | 0.1 mM              |
| ep0122.2111 | p1733 | $5.6 \cdot 10^{-5}$ |
| ic0918.2111 | p1734 | 0.1 mM              |
| ep0918.2111 | p1735 | 0.000538625         |
| ic0657.2111 | p1736 | 0.1 mM              |
| ep0657.2111 | p1737 | $9.6 \cdot 10^{-5}$ |
| ic0662.2111 | p1738 | 0.1 mM              |
| ep0662.2111 | p1739 | 0.000125            |
| ic0666.2111 | p1740 | 0.1 mM              |
| ep0666.2111 | p1741 | 0.0056              |
| ic0672.2111 | p1742 | 0.1 mM              |
| ep0672.2111 | p1743 | 0.000812            |
| ic0595.2111 | p1744 | 0.1 mM              |
| ep0595.2111 | p1745 | 0.0005356           |
| ic0700.2111 | p1746 | 0.1 mM              |
| ep0700.2111 | p1747 | 0.000114            |
| ic1059.2111 | p1748 | 0.1 mM              |
| ep1059.2111 | p1749 | $3.2 \cdot 10^{-5}$ |
| ic1337.2111 | p1750 | 0.1 mM              |
| ep1337.2111 | p1751 | 0.000373            |
| ic1346.2111 | p1752 | 0.1 mM              |
| ep1346.2111 | p1753 | 0.00288             |
| ic1351.2111 | p1754 | 0.1 mM              |
| ep1351.2111 | p1755 | 0.000697            |
| ic1524.2111 | p1756 | 0.1 mM              |
| ep1524.2111 | p1757 | 0.000781            |
| ic1569.2111 | p1758 | 0.1 mM              |
| ep1569.2111 | p1759 | $1.5 \cdot 10^{-5}$ |

**Table S12. Benchmark 1: Experimental concentrations for one extracellular and 37 intracellular metabolites.**

| observable number | name                        | compartment | concentration mM | SEM % | source | state #          |
|-------------------|-----------------------------|-------------|------------------|-------|--------|------------------|
| 1                 | 1,3-bisphospho-D-glycerate  | cell        | 0,000737         |       | G.U.   | x(19) = 0.000737 |
| 2                 | 2-oxoglutarate              | cell        | 0,175            | 42    | M.U.   | x(39) = 0.175    |
| 3                 | 2-phospho-D-glyceric acid   | cell        | 0,0169           | 18    | G.U.   | x(40) = 0.0169   |
| 4                 | 3-phospho-serine            | cell        | 0,00298          | 62    | M.U.   | x(52) = 0.00298  |
| 5                 | 3-phosphoglycerate          | cell        | 0,117            | 18    | G.U.   | x(53) = 0.117    |
| 6                 | acetaldehyde                | cell        | 0,178            |       | G.U.   | x(79) = 0.178    |
| 7                 | acetate                     | cell        | 55,8             | 46    | G.U.   | x(80) = 55.8     |
| 8                 | ADP                         | cell        | 1,29             |       | G.U.   | x(87) = 1.29     |
| 9                 | trehalose 6-phosphate       | cell        | 0,02             |       | G.U.   | x(89) = 0.02     |
| 10                | AMP                         | cell        | 0,44             |       | G.U.   | x(91) = 0.44     |
| 11                | ATP                         | cell        | 4,29             |       | G.U.   | x(93) = 4.29     |
| 12                | D-fructose 1,6-bisphosphate | cell        | 1,15             | 20    | G.U.   | x(112) = 1.15    |
| 13                | D-fructose 6-phosphate      | cell        | 0,0589           | 15    | G.U.   | x(113) = 0.0589  |
| 14                | D-glucose                   | cell        | 1,57             | 5     | G.U.   | x(114) = 1.57    |
| 15                | D-glucose 1-phosphate       | cell        | 0,135            |       | G.U.   | x(115) = 0.135   |
| 16                | D-glucose 6-phosphate       | cell        | 0,193            | 10    | G.U.   | x(116) = 0.193   |
| 17                | dATP                        | cell        | 0,18             |       | [4]    | x(123) = 0.175   |
| 18                | dihydroxyacetone phosphate  | cell        | 0,29             | 19    | G.U.   | x(132) = 0.29    |
| 19                | ethanol                     | cell        | 55,5             | 42    | G.U.   | x(144) = 55.5    |
| 20                | glycerol                    | cell        | 0,15             |       | G.U.   | x(156) = 0.15    |
| 21                | glyceraldehyde 3-phosphate  | cell        | 0,079            | 27    | G.U.   | x(155) = 0.079   |
| 22                | glycerol 3-phosphate        | cell        | 0,0685           | 24    | G.U.   | x(157) = 0.0685  |
| 23                | GTP                         | cell        | 0,98             |       | [4]    | x(160) = 0.975   |
| 24                | IMP                         | cell        | 0,16             |       | [4]    | x(165) = 0.162   |
| 25                | L-alanine                   | cell        | 0,00953          | 38    | M.U.   | x(171) = 0.00953 |
| 26                | L-glutamate                 | cell        | 0,298            | 18    | M.U.   | x(180) = 0.298   |
| 27                | L-glycine                   | cell        | 0,195            | 37    | M.U.   | x(182) = 0.195   |
| 28                | L-serine                    | cell        | 0,2              | 15    | M.U.   | x(196) = 0.2     |
| 29                | L-threonine                 | cell        | 0,177            | 9     | M.U.   | x(197) = 0.177   |
| 30                | NAD                         | cell        | 1,5              |       | G.U.   | x(217) = 1.5     |
| 31                | NADH                        | cell        | 0,0867           |       | G.U.   | x(218) = 0.0867  |
| 32                | phosphoenolpyruvate         | cell        | 0,153            | 24    | G.U.   | x(239) = 0.153   |
| 33                | pyruvate                    | cell        | 0,527            | 17    | G.U.   | x(246) = 0.527   |
| 34                | trehalose                   | cell        | 0,00385          | 20    | G.U.   | x(261) = 0.00385 |
| 35                | UDP                         | cell        | 0,282            |       | G.U.   | x(265) = 0.282   |
| 36                | UDP-D-glucose               | cell        | 0,467            |       | G.U.   | x(266) = 0.467   |
| 37                | UTP                         | cell        | 0,649            |       | G.U.   | x(268) = 0.649   |
| 38                | xanthosine-5-phosphate      | cell        | 0,05             |       | [4]    | x(269) = 0.049   |

Sources: G.U. (glycolysis, unpublished) / M.U. (Manchester Centre for Integrative Systems Biology, unpublished) / [4].

**Table S13. Benchmark 1: six experimental flux exchanges**

| observable number | name           | flux<br>amol/s/cell | mM/s    | SEM<br>% | state #                       |
|-------------------|----------------|---------------------|---------|----------|-------------------------------|
| 39                | D-glucose      | -74,5               | -3,72   | 32       | r_1166: glucose transport     |
| 40                | carbon dioxide | 122                 | 6,11    | 19       | r_1697: CO2 transport         |
| 41                | ethanol        | 91,2                | 4,56    | 40       | r_1762: ethanol transport     |
| 42                | acetate        | 1,59                | 0,0793  | 28       | r_1106: acetate transport     |
| 43                | glycerol       | 0,623               | 0,0311  | 19       | r_1172: glycerol transport    |
| 44                | trehalose      | 0,156               | 0,00778 | 19       | r_2079: trehalose transporter |

Six experimental flux exchanges. In addition, ammonia, oxygen, phosphate and sulphate are consumed at unknown rates. Any other flux exchange is assumed to be negligible. Negative fluxes denote flow into the cell. Concentration flux is calculated using an effective volume of 20 fL.



## 4.2 B2: dynamic CCM of *E. coli*

Experimental data used, but not published, in [5]. Units: concentrations in mmol/l, time in minutes.

**Table S14.** Benchmark 2: Time-course concentrations of 9 metabolites

| time   | PEP  | G6P  | PYR  | F6P  | GLC <sub>ex</sub> | G1P  | 6PG  | FDP  | GAP  |
|--------|------|------|------|------|-------------------|------|------|------|------|
| 0.15   | 1.99 | 4.39 | 4.07 | 0.62 |                   |      |      |      |      |
| 0.3    | 2.10 | 4.76 | 3.71 | 0.66 |                   |      |      |      |      |
| 0.45   | 2.09 | 4.86 | 3.19 | 0.74 |                   |      |      |      |      |
| 0.6    | 1.84 | 4.65 | 3.57 | 0.62 |                   |      |      |      |      |
| 0.8    | 2.31 | 4.75 | 3.14 | 0.75 |                   |      |      |      |      |
| 2      |      |      |      |      |                   | 1.35 |      |      |      |
| 3.5    |      |      |      |      |                   |      | 1.01 |      |      |
| 4      |      |      |      |      |                   |      | 0.92 |      |      |
| 4.5    |      |      |      |      |                   |      |      | 0.19 | 0.28 |
| 5.5    | 2.76 | 5.52 | 2.38 | 0.92 | 1.256             |      |      |      |      |
| 11     |      |      |      |      |                   |      |      | 0.56 | 0.32 |
| 12     | 3.05 | 5.86 | 3.71 | 1.15 |                   |      | 1.15 |      |      |
| 12.25  |      |      |      |      |                   |      | 1.19 |      |      |
| 13.5   |      |      |      |      | 1.311             |      |      |      |      |
| 16     |      |      |      |      |                   | 0.83 |      |      |      |
| 19     |      |      |      |      |                   | 0.83 |      |      |      |
| 20     |      |      |      |      |                   |      |      | 1.00 | 0.31 |
| 21     |      |      |      |      |                   |      | 1.06 |      |      |
| 21.5   | 2.42 | 4.39 | 3.19 | 0.57 |                   |      |      |      |      |
| 25.75  |      |      |      |      |                   |      | 1.10 |      |      |
| 30     |      |      |      |      |                   |      | 1.05 | 2.83 | 0.24 |
| 31     |      |      |      |      | 1.283             | 0.78 |      |      |      |
| 31.5   | 2.23 | 3.60 | 5.24 | 0.46 |                   |      |      |      |      |
| 32.25  |      |      |      |      |                   |      | 1.08 |      |      |
| 57     |      |      |      |      |                   | 0.84 |      |      |      |
| 58.5   |      |      |      |      |                   |      | 0.97 |      |      |
| 59     |      |      |      |      |                   |      | 1.01 |      |      |
| 60     |      |      |      |      |                   |      |      | 1.50 | 0.30 |
| 61     | 2.52 | 3.83 | 4.47 | 0.57 | 0.861             |      |      |      |      |
| 90     | 2.81 | 4.30 | 3.62 | 0.57 |                   |      |      | 2.26 | 0.18 |
| 91     |      |      |      |      | 0.597             |      |      |      |      |
| 91.5   |      |      |      |      |                   | 0.64 |      |      |      |
| 119.5  |      |      |      |      |                   |      |      | 2.40 | 0.22 |
| 119.75 |      |      |      |      |                   |      | 0.92 |      |      |
| 120.5  | 2.71 | 4.05 | 3.62 | 0.69 |                   |      |      |      |      |
| 124    |      |      |      |      |                   |      | 0.89 |      |      |
| 150.5  |      |      |      |      |                   | 0.74 |      |      |      |
| 151    |      |      |      |      | 0.096             |      |      |      |      |
| 178    |      |      |      |      |                   |      | 0.74 |      |      |
| 180    |      |      |      |      |                   |      | 0.88 | 1.25 | 0.21 |
| 180.5  | 2.71 | 3.27 | 2.86 | 0.46 |                   |      |      |      |      |
| 181    |      |      |      |      | 0.043             |      |      |      |      |
| 209    |      |      |      |      |                   |      | 0.80 |      |      |
| 212.5  |      |      |      |      | 0.051             |      |      |      |      |
| 239.5  |      |      |      |      |                   |      |      | 0.07 | 0.22 |
| 241    |      |      |      |      | 0.048             |      |      |      |      |
| 270.5  |      |      |      |      | 0.048             |      |      |      |      |
| 299    |      |      |      |      |                   | 0.70 |      |      |      |

|       |      |      |      |      |      |  |  |      |      |
|-------|------|------|------|------|------|--|--|------|------|
| 300   |      |      |      |      |      |  |  | 0.02 | 0.20 |
| 300.5 | 2.70 | 3.38 | 2.40 | 0.46 |      |  |  |      |      |
| 301   |      |      |      |      | 0.06 |  |  |      |      |

**Table S15.** Benchmark 2: parameter values

| Param. name          | Param. # | Param. value            |
|----------------------|----------|-------------------------|
| kALDO,dhap           | p1       | 0.088 mM                |
| kALDO,eq             | p2       | 0.144 mM                |
| kALDO,fdp            | p3       | 1.75 mM                 |
| kALDO,gap            | p4       | 0.088 mM                |
| kALDO,gap,inh        | p5       | 0.6 mM                  |
| KDAHPS,e4p           | p6       | 0.035 mM                |
| KDAHPS,pep           | p7       | 0.0053 mM               |
| KENO,eq              | p8       | 6.73 mM                 |
| KENO,pg2             | p9       | 0.1 mM                  |
| KENO,pep             | p10      | 0.135 mM                |
| KG1PAT,atp           | p11      | 4.42 mM                 |
| KG1PAT,fdp           | p12      | 0.119 mM                |
| KG1PAT,g1p           | p13      | 3.2 mM                  |
| KG3PDH,dhap          | p14      | 1.0 mM                  |
| KG6PDH,g6p           | p15      | 14.4 mM                 |
| KG6PDH,nadp          | p16      | 0.0246 mM               |
| KG6PDH,nadph,g6pinh  | p17      | 6.43 mM                 |
| KG6PDH,nadph,nadpinh | p18      | 0.01 mM                 |
| KGAPDH,eq            | p19      | 0.63                    |
| KGAPDH,gap           | p20      | 0.683 mM                |
| KGAPDH,nad           | p21      | 0.252 mM                |
| KGAPDH,nadh          | p22      | 1.09 mM                 |
| KGAPDH,pgp           | p23      | $1.04 \cdot 10^{-5}$ mM |
| KPDH,pyr             | p24      | 1159.0 mM               |
| KpepCxylase,fdp      | p25      | 0.7 mM                  |
| KpepCxylase,pep      | p26      | 4.07 mM                 |
| KPFK,adp,a           | p27      | 128.0 mM                |
| KPFK,adp,b           | p28      | 3.89 mM                 |
| KPFK,adpc            | p29      | 4.14 mM                 |
| KPFK,amp,a           | p30      | 19.1 mM                 |
| KPFK,amp,b           | p31      | 3.2 mM                  |
| KPFK,atps            | p32      | 0.123 mM                |
| KPFK,f6ps            | p33      | 0.325 mM                |
| KPFK,pep             | p34      | 3.26 mM                 |
| KPGDH,atpinh         | p35      | 208.0 mM                |
| KPGDH,nadp           | p36      | 0.0506 mM               |
| KPGDH,nadphinh       | p37      | 0.0138 mM               |
| KPGDH,pg             | p38      | 37.5 mM                 |
| KPGI,eq              | p39      | 0.1725                  |
| KPGI,f6p             | p40      | 0.266 mN                |
| KPGI,f6p,pginh       | p41      | 0.2 mM                  |
| KPGI,g6p             | p42      | 2.9 mM                  |
| KPGI,g6p,pginh       | p43      | 0.2 mM                  |
| KPGK,adp             | p44      | 0.185 mM                |
| KPGK,atp             | p45      | 0.653 mM                |
| KPGK,eq              | p46      | 1934.4                  |
| KPGK,pg3             | p47      | 0.473 mM                |
| KPGK,pgp             | p48      | 0.0468 mM               |
| KPGluMu,eq           | p49      | 0.188                   |
| KPGluMu,pg2          | p50      | 0.369 mM                |
| KPGluMu,pg3          | p51      | 0.2 mM                  |

|                 |      |                                              |
|-----------------|------|----------------------------------------------|
| KPGM,eq         | p52  | 0.196                                        |
| KPGM,g1p        | p53  | 0.0136 mM                                    |
| KPGM,g6p        | p54  | 1.038 mM                                     |
| KPK,adp         | p55  | 0.26 mM                                      |
| KPK,amp         | p56  | 0.2 mM                                       |
| KPK,atp         | p57  | 22.5 mM                                      |
| KPK,fdp         | p58  | 0.19 mM                                      |
| KPK,pep         | p59  | 0.31 mM                                      |
| KPTS,a1         | p60  | 3082.3 mM                                    |
| KPTS,a2         | p61  | 0.01 mM                                      |
| KPTS,a3         | p62  | 245.3                                        |
| KPTS,g6p        | p63  | 2.15 mM                                      |
| KR5PI,eq        | p64  | 4.0                                          |
| KRPPK,rib5p     | p65  | 0.1 mM                                       |
| KRu5P,eq        | p66  | 1.4                                          |
| KSerSynth,pg3   | p67  | 1.0 mM                                       |
| KSynth1,pep     | p68  | 1.0 mM                                       |
| KSynth2,pyr     | p69  | 1.0 mM                                       |
| KTA,eq          | p70  | 1.05                                         |
| kTIS,dhap       | p71  | 2.8 mM                                       |
| kTIS,eq         | p72  | 1.39                                         |
| kTIS,gap        | p73  | 0.3 mM                                       |
| KTka,eq         | p74  | 1.2                                          |
| KTkb,eq         | p75  | 10.0                                         |
| LPFK            | p76  | 5629067.0                                    |
| LPK             | p77  | 1000.0                                       |
| nDAHPS,e4p      | p78  | 2.6                                          |
| nDAHPS,pep      | p79  | 2.2                                          |
| nG1PAT,fdp      | p80  | 1.2                                          |
| nPDH            | p81  | 3.68                                         |
| npepCxylase,fdp | p82  | 4.21                                         |
| nPFK            | p83  | 11.1                                         |
| nPK             | p84  | 4.0                                          |
| nPTS,g6p        | p85  | 3.66                                         |
| rmax,ALDO       | p86  | 17.41464425 mM·s <sup>-1</sup>               |
| rmax,DAHPS      | p87  | 0.1079531227 mM·s <sup>-1</sup>              |
| rmax,ENO        | p88  | 330.4476151 mM·s <sup>-1</sup>               |
| rmax,G1PAT      | p89  | 0.007525458026 mM·s <sup>-1</sup>            |
| rmax,G3PDH      | p90  | 0.01162042696 mM·s <sup>-1</sup>             |
| rmax,G6PDH      | p91  | 1.380196955 mM·s <sup>-1</sup>               |
| rmax,GAPDH      | p92  | 921.5942861 mM·s <sup>-1</sup>               |
| rmax,MetSynth   | p93  | 0.0022627 mM·s <sup>-1</sup>                 |
| rmax,MurSynth   | p94  | 4.3711 · 10 <sup>-4</sup> mM·s <sup>-1</sup> |
| rmax,PDH        | p95  | 6.059531017 mM·s <sup>-1</sup>               |
| rmax,pepCxylase | p96  | 0.1070205858 mM·s <sup>-1</sup>              |
| rmax,PFK        | p97  | 1840.584747 mM·s <sup>-1</sup>               |
| rmax,PGDH       | p98  | 16.23235977 mM·s <sup>-1</sup>               |
| rmax,PGI        | p99  | 650.9878687 mM·s <sup>-1</sup>               |
| rmax,PGK        | p100 | 3021.773771 mM·s <sup>-1</sup>               |
| rmax,PGluMu     | p101 | 89.04965407 mM·s <sup>-1</sup>               |
| rmax,PGM        | p102 | 0.8398242773 mM·s <sup>-1</sup>              |
| rmax,PK         | p103 | 0.06113150238 mM·s <sup>-1</sup>             |
| rmax,PTS        | p104 | 7829.78 mM·s <sup>-1</sup>                   |
| rmax,R5PI       | p105 | 4.83841193 mM·s <sup>-1</sup>                |

|               |      |                                  |
|---------------|------|----------------------------------|
| rmax,RPPK     | p106 | 0.01290045226 mM·s <sup>-1</sup> |
| rmax,Ru5P     | p107 | 6.739029475 mM·s <sup>-1</sup>   |
| rmax,SerSynth | p108 | 0.025712107 mM·s <sup>-1</sup>   |
| rmax,Synth1   | p109 | 0.01953897003 mM·s <sup>-1</sup> |
| rmax,Synth2   | p110 | 0.07361855055 mM·s <sup>-1</sup> |
| rmax,TA       | p111 | 10.87164108 mM·s <sup>-1</sup>   |
| rmax,TIS      | p112 | 68.67474392 mM·s <sup>-1</sup>   |
| rmax,TKa      | p113 | 9.473384783 mM·s <sup>-1</sup>   |
| rmax,TKb      | p114 | 86.55855855 mM·s <sup>-1</sup>   |
| rmax,TrpSynth | p115 | 0.001037 mM·s <sup>-1</sup>      |
| VALDO,blf     | p116 | 2.0                              |

**Table S16.** Benchmark 2: model outputs

| Number | Metabolite | Number | Metabolite  |
|--------|------------|--------|-------------|
| 1      | DHAP       | 10     | 2PG         |
| 2      | E4P        | 11     | 3PG         |
| 3      | F6P        | 12     | PGP         |
| 4      | FDP        | 13     | PYR         |
| 5      | GLP        | 14     | RIB5P       |
| 6      | G6P        | 15     | RIBU5P      |
| 7      | GAP        | 16     | SED7P       |
| 8      | PEP        | 17     | XYL5P       |
| 9      | 6PG        | 18     | Extrac. GLC |

4.3 B3: regulation of the CCM of *E. coli*

Table S17. Benchmark 3: parameter values

| Param. number | Param. name              | Description                 | Param. value                                |
|---------------|--------------------------|-----------------------------|---------------------------------------------|
| 1             | $p_{ENV,MACT}$           | Molar mass of acetate       | $60.05 g_{ACT}mol^{-1}$                     |
| 2             | $p_{ENV,MGLC}$           | Molar mass of glucose       | $180.156 g_{GLC}mol^{-1}$                   |
| 3             | $p_{ENV,UC}$             | Unit conversion             | $9.5 \cdot 10^{-7} g_{DW}(\mu[OD])^{-1}$    |
| 4             | $p_{AceA,K_{cat}}$       | Specific activity           | $614 \mu mol(g_{prots})^{-1}$               |
| 5             | $p_{AceA,n}$             | Number of subunits          | 4                                           |
| 6             | $p_{AceA,L}$             | Allosteric constant         | $5.01 \cdot 10^4$                           |
| 7             | $p_{AceA,K_{ICT}}$       | Affinity constant           | $0.022 \mu mol g_{DW}^{-1}$                 |
| 8             | $p_{AceA,K_{PEP}}$       | Affinity constant           | $0.055 \mu mol g_{DW}^{-1}$                 |
| 9             | $p_{AceA,K_{PG3}}$       | Affinity constant           | $0.72 \mu mol g_{DW}^{-1}$                  |
| 10            | $p_{AceA,K_{AKG}}$       | Affinity constant           | $0.827 \mu mol g_{DW}^{-1}$                 |
| 11            | $p_{AceB,K_{cat}}$       | Specific activity           | $47.8 \mu mol(g_{Prot}s)^{-1}$              |
| 12            | $p_{AceB,K_{GLX}}$       | Affinity constant           | $0.95 \mu mol g_{DW}^{-1}$                  |
| 13            | $p_{AceB,K_{ACO A}}$     | Affinity constant           | $0.755 \mu mol g_{DW}^{-1}$                 |
| 14            | $p_{AceB,K_{GLXACO A}}$  | Affinity constant           | $0.719 \mu mol g_{DW}^{-1}$                 |
| 15            | $p_{AceK,K_{cat,ki}}$    | Specific activity           | $3.4 \cdot 10^{12} s^{-1}$                  |
| 16            | $p_{AceK,K_{cat,ph}}$    | Specific activity           | $1.7 \cdot 10^9 s^{-1}$                     |
| 17            | $p_{AceK,n}$             | Number of subunits          | 2                                           |
| 18            | $p_{AceK,L}$             | Allosteric constant         | $1 \cdot 10^8$                              |
| 19            | $p_{AceK,K_{Icd}}$       | Affinity constant           | $0.043 g_{prot}g_{DW}^{-1}$                 |
| 20            | $p_{AceK,K_{Icd-P}}$     | Affinity constant           | $0.643 g_{prot}g_{DW}^{-1}$                 |
| 21            | $p_{AceK,K_{PEP}}$       | Affinity constant           | $0.539 \mu mol g_{DW}^{-1}$                 |
| 22            | $p_{AceK,K_{PYR}}$       | Affinity constant           | $0.038 \mu mol g_{DW}^{-1}$                 |
| 23            | $p_{AceK,K_{OAA}}$       | Affinity constant           | $0.173 \mu mol g_{DW}^{-1}$                 |
| 24            | $p_{AceK,K_{GLX}}$       | Affinity constant           | $0.866 \mu mol g_{DW}^{-1}$                 |
| 25            | $p_{AceA,K_{AKG}}$       | Affinity constant           | $0.82 \mu mol g_{DW}^{-1}$                  |
| 26            | $p_{AceK,K_{PG3}}$       | Affinity constant           | $1.57 \mu mol g_{DW}^{-1}$                  |
| 27            | $p_{AceK,K_{ICT}}$       | Affinity constant           | $0.137 \mu mol g_{DW}^{-1}$                 |
| 28            | $p_{Acoa2act,K_{cat}}$   | Specific activity           | $3079 \mu mol(g_{Prot}s)^{-1}$              |
| 29            | $p_{Acoa2act,n}$         | Number of subunits          | 2                                           |
| 30            | $p_{Acoa2act,L}$         | Allosteric constant         | $6.39 \cdot 10^5$                           |
| 31            | $p_{Acoa2act,K_{ACO A}}$ | Affinity constant           | $0.022 \mu mol g_{DW}^{-1}$                 |
| 32            | $p_{Acoa2act,K_{PYR}}$   | Affinity constant           | $0.022 \mu mol g_{DW}^{-1}$                 |
| 33            | $p_{Acs,k_{cat}}$        | Specific activity           | $1.0296 \cdot 10^4 \mu mol(g_{Prots})^{-1}$ |
| 34            | $p_{Acs,K_{ACT}}$        | Affinity constant           | $10^{-3} g_{ACT}l^{-1}$                     |
| 35            | $p_{Akg2mal,k_{cat}}$    | Specific activity           | $1530 \mu mol(g_{Prots})^{-1}$              |
| 36            | $p_{Akg2mal,k_{AKG}}$    | Affinity constant           | $0.548 \mu mol g_{DW}^{-1}$                 |
| 37            | $p_{cAMPdegr,k_{cat}}$   | Specific activity           | $1 \cdot 10^3 \mu mol(g_{Prots})^{-1}$      |
| 38            | $p_{cAMPdegr,k_{cAMP}}$  | Affinity constant           | $0.1 \mu mol g_{DW}^{-1}$                   |
| 39            | $p_{Cya,k_{cat}}$        | Specific activity           | $993 \mu mol(g_{Prots})^{-1}$               |
| 40            | $p_{Cya,k_{EIIA-P}}$     | Affinity constant           | $1.7 \cdot 10^{-3} g_{Prot}g_{DW}^{-1}$     |
| 41            | $p_{Emp,k_{cat},f}$      | Spec. activ. forward react. | $1011 \mu mol(g_{Prots})^{-1}$              |
| 42            | $p_{Emp,k_{cat},r}$      | Spec. activ. reverse react. | $857.4234 \mu mol(g_{Prots})^{-1}$          |
| 43            | $p_{Emp,K_{FBP}}$        | Affinity constant           | $5.92 \mu mol g_{DW}^{-1}$                  |
| 44            | $p_{Emp,K_{PG3}}$        | Affinity constant           | $16.6 \mu mol g_{DW}^{-1}$                  |
| 45            | $p_{Eno,k_{cat},f}$      | Spec. activ. forward react. | $704.9945 \mu mol(g_{Prots})^{-1}$          |
| 46            | $p_{Eno,k_{cat},r}$      | Spec. activ. reverse react. | $529.5067 \mu mol(g_{Prots})^{-1}$          |
| 47            | $p_{Eno,K_{PG3}}$        | Affinity constant           | $4.76 \mu mol g_{DW}^{-1}$                  |

|     |                      |                     |                                                   |
|-----|----------------------|---------------------|---------------------------------------------------|
| 48  | $pEno, K_{PEP}$      | Affinity constant   | $1.11 \mu\text{mol}g_{DW}^{-1}$                   |
| 49  | $pFdp, k_{cat}$      | Specific activity   | $404.2035 \mu\text{mol}(g_{Prots})^{-1}$          |
| 50  | $pFdp, n$            | Number of subunits  | 4                                                 |
| 51  | $pFdp, L$            | Allosteric constant | $4 \cdot 10^6$                                    |
| 52  | $pFdp, K_{FBP}$      | Affinity constant   | $3 \cdot 10^{-3} \mu\text{mol}g_{DW}^{-1}$        |
| 53  | $pFdp, K_{PEP}$      | Affinity constant   | $0.3 \mu\text{mol}g_{DW}^{-1}$                    |
| 54  | $pGltA, K_{cat}$     | Specific activity   | $5.6761 \cdot 10^3 \mu\text{mol}(g_{Prots})^{-1}$ |
| 55  | $pGltA, K_{OAA}$     | Affinity constant   | $0.029 \mu\text{mol}g_{DW}^{-1}$                  |
| 56  | $pGltA, K_{ACoA}$    | Affinity constant   | $0.212 \mu\text{mol}g_{DW}^{-1}$                  |
| 57  | $pGltA, K_{OAAACoA}$ | Affinity constant   | $0.029 \mu\text{mol}g_{DW}^{-1}$                  |
| 58  | $pGltA, K_{AKG}$     | Affinity constant   | $0.63 \mu\text{mol}g_{DW}^{-1}$                   |
| 59  | $pIcd, k_{cat}$      | Specific activity   | $695 \mu\text{mol}(g_{Prots})^{-1}$               |
| 60  | $pIcd, n$            | Number of subunits  | 2                                                 |
| 61  | $pIcd, L$            | Allosteric constant | 127                                               |
| 62  | $pIcd, K_{ICT}$      | Affinity constant   | $1.6 \cdot 10^{-4} \mu\text{mol}g_{DW}^{-1}$      |
| 63  | $pIcd, K_{PEP}$      | Affinity constant   | $0.334 \mu\text{mol}g_{DW}^{-1}$                  |
| 64  | $pMdh, k_{cat}$      | Specific activity   | $5.4375 \cdot 10^3 \mu\text{mol}(g_{Prots})^{-1}$ |
| 65  | $pMdh, n$            | Hill coefficient    | 1.7                                               |
| 66  | $pMdh, k_{MAL}$      | Affinity constant   | $10.1 \mu\text{mol}g_{DW}^{-1}$                   |
| 67  | $pMaeAB, k_{cat}$    | Specific activity   | $1879 \mu\text{mol}(g_{Prots})^{-1}$              |
| 68  | $pMaeAB, n$          | Number of subunits  | 1.33                                              |
| 69  | $pMaeAB, L$          | Allosteric constant | $1.04 \cdot 10^5$                                 |
| 70  | $pMaeAB, K_{MAL}$    | Affinity constant   | $6.24 \cdot 10^{-03} \mu\text{mol}g_{DW}^{-1}$    |
| 71  | $pMaeAB, k_{ACoA}$   | Affinity constant   | $3.64 \mu\text{mol}g_{DW}^{-1}$                   |
| 72  | $pMaeAB, k_{CAMP}$   | Affinity constant   | $6.54 \mu\text{mol}g_{DW}^{-1}$                   |
| 73  | $pPckA, k_{cat}$     | Specific activity   | $377.3427 \mu\text{mol}(g_{Prots})^{-1}$          |
| 74  | $pPckA, k_{OAA}$     | Affinity constant   | $0.184 \mu\text{mol}g_{DW}^{-1}$                  |
| 75  | $pPckA, k_{PEP}$     | Affinity constant   | $1000 \mu\text{mol}g_{DW}^{-1}$                   |
| 76  | $pPdh, k_{cat}$      | Specific activity   | $5.4793 \cdot 10^3 \mu\text{mol}(g_{Prots})^{-1}$ |
| 77  | $pPdh, n$            | Number of subunits  | 2.65                                              |
| 78  | $pPdh, L$            | Allosteric constant | 3.4                                               |
| 79  | $pPdh, K_{PYR}$      | Affinity constant   | $0.128 \mu\text{mol}g_{DW}^{-1}$                  |
| 80  | $pPdh, K_{I, PYR}$   | Affinity constant   | $0.231 \mu\text{mol}g_{DW}^{-1}$                  |
| 81  | $pPdh, K_{GLX}$      | Affinity constant   | $0.218 \mu\text{mol}g_{DW}^{-1}$                  |
| 82  | $pPfkA, K_{cat}$     | Specific activity   | $5.3932 \cdot 10^5 \mu\text{mol}(g_{Prots})^{-1}$ |
| 83  | $pPfkA, n$           | Number of subunits  | 4                                                 |
| 84  | $pPfkA, L$           | Allosteric constant | $9.5 \cdot 10^7$                                  |
| 85  | $pPfkA, K_{G6P}$     | Affinity constant   | $0.022 \mu\text{mol}g_{DW}^{-1}$                  |
| 86  | $pPfkA, K_{PEP}$     | Affinity constant   | $0.138 \mu\text{mol}g_{DW}^{-1}$                  |
| 87  | $pPpc, K_{cat}$      | Specific activity   | $1.4905 \cdot 10^4 \mu\text{mol}(g_{Prots})^{-1}$ |
| 88  | $pPpc, n$            | Number of subunits  | 3                                                 |
| 89  | $pPpc, L$            | Allosteric constant | $5.2 \cdot 10^6$                                  |
| 90  | $pPpc, K_{PEP}$      | Affinity constant   | $0.048 \mu\text{mol}g_{DW}^{-1}$                  |
| 91  | $pPpc, K_{FBP}$      | Affinity constant   | $0.408 \mu\text{mol}g_{DW}^{-1}$                  |
| 92  | $pPpsA, k_{cat}$     | Specific activity   | $1.32 \mu\text{mol}(g_{Prots})^{-1}$              |
| 93  | $pPpsA, n$           | Number of subunits  | 2                                                 |
| 94  | $pPpsA, L$           | Allosteric constant | $1.0 \cdot 10^{-79}$                              |
| 95  | $pPpsA, K_{PYR}$     | Affinity constant   | $1.77 \cdot 10^{-3} \mu\text{mol}g_{DW}^{-1}$     |
| 96  | $pPpsA, K_{PEP}$     | Affinity constant   | $1.0 \cdot 10^{-3} \mu\text{mol}g_{DW}^{-1}$      |
| 97  | $pPPyKF, K_{cat}$    | Specific activity   | $1.3735 \cdot 10^4 \mu\text{mol}(g_{Prots})^{-1}$ |
| 98  | $pPPyKF, n$          | Number of subunits  | 4                                                 |
| 99  | $pPPyKF, L$          | Allosteric constant | $1.0 \cdot 10^4$                                  |
| 100 | $pPPyKF, K_{PEP}$    | Affinity constant   | $5 \mu\text{mol}g_{DW}^{-1}$                      |
| 101 | $pPPyKF, K_{FBP}$    | Affinity constant   | $0.413 \mu\text{mol}g_{DW}^{-1}$                  |



|     |                                 |                       |                                                 |
|-----|---------------------------------|-----------------------|-------------------------------------------------|
| 102 | $p_{PPTS,K_l}$                  | Specific activity     | $116 \mu\text{mol}(g_{Prot})^{-1}$              |
| 103 | $p_{PPTS,K_{m_1}}$              | Specific activity     | $46.3 \mu\text{mol}(g_{Prot})^{-1}$             |
| 104 | $p_{PPTS,K_A}$                  | Specific activity     | $2520 \mu\text{mol}(g_{Prot})^{-1}$             |
| 105 | $p_{PPTS,K_{EIIA}}$             | Affinity constant     | $8.5 \cdot 10^{-3} g_{Prot} g_{DW}^{-1}$        |
| 106 | $p_{PPTS,K_{GLC}}$              | Affinity constant     | $1.2 \cdot 10^{-3} g_{GLC} l^{-1}$              |
| 107 | $p_{PCra, scale}$               | Specific activity     | $100 g_{Prot} (\mu\text{mols})^{-1}$            |
| 108 | $p_{PCra, K_{FBP}}$             | Affinity constant     | $1.36 \mu\text{mol} g_{DW}^{-1}$                |
| 109 | $p_{PCra, n}$                   | Hill coefficient      | 2                                               |
| 110 | $p_{PCrp, scale}$               | Specific activity     | $1.0 \cdot 10^8 g_{Prot} (\mu\text{mols})^{-1}$ |
| 111 | $p_{PCrp, K_{cAMP}}$            | Affinity constant     | $0.895 \mu\text{mol} g_{DW}^{-1}$               |
| 112 | $p_{PCrp, n}$                   | Hill coefficient      | 1                                               |
| 113 | $p_{PPdhr, scale}$              | Specific activity     | $100 g_{Prot} (\mu\text{mols})^{-1}$            |
| 114 | $p_{PPdhr, K_{PYR}}$            | Affinity constant     | $0.164 \mu\text{mol} g_{DW}^{-1}$               |
| 115 | $p_{PPdhr, n}$                  | Hill coefficient      | 1                                               |
| 116 | $p_{aceBAK, v_{Cra, unbound}}$  | Basal expression rate | $1.9 \cdot 10^{-9} g_{Prot} (g_{DW} s)^{-1}$    |
| 117 | $p_{aceBAK, v_{Cra, bound}}$    | Max. expression rate  | $2.0 \cdot 10^{-6} g_{Prot} (g_{DW} s)^{-1}$    |
| 118 | $p_{aceBAK, K_{Cra}}$           | Affinity constant     | $3.65 \cdot 10^{-3} g_{Prot} g_{DW}^{-1}$       |
| 119 | $p_{aceBAK, aceB factor}$       | Scaling factor        | 0.3                                             |
| 120 | $p_{aceBAK, aceK factor}$       | Scaling factor        | 0.03                                            |
| 121 | $p_{aceBAK, K_{DNA}}$           | Affinity constant     | $2.19 [\text{AU}] g_{DW}^{-1}$                  |
| 122 | $p_{aceBAK, K_{PYR}}$           | Affinity constant     | $0.897 \mu\text{mol} g_{DW}^{-1}$               |
| 123 | $p_{aceBAK, K_{PYR} prime}$     | Affinity constant     | $3.01 \cdot 10^{-3} \mu\text{mol} g_{DW}^{-1}$  |
| 124 | $p_{aceBAK, K_{GLX}}$           | Affinity constant     | $4.88 \cdot 10^{-3} \mu\text{mol} g_{DW}^{-1}$  |
| 125 | $p_{aceBAK, L}$                 | Allosteric constant   | 923                                             |
| 126 | $p_{aceBAK, K_{cat, IclR}}$     | Specific activity     | $9.3 \cdot 10^{-4} s^{-1}$                      |
| 127 | $p_{aceBAK, DNA}$               | DNA concentration     | $1 [\text{AU}] g_{DW}^{-1}$                     |
| 128 | $p_{aceBAK, v_{Crp, bound}}$    | Basal expression rate | $2.3 \cdot 10^{-10} g_{Prot} (g_{DW} s)^{-1}$   |
| 129 | $p_{aceBAK, v_{Crp, unbound}}$  | Max. expression rate  | $2.0 \cdot 10^{-8} g_{Prot} (g_{DW} s)^{-1}$    |
| 130 | $p_{aceBAK, K_{Crp}}$           | Affinity constant     | $0.341 g_{Prot} (g_{DW} s)^{-1}$                |
| 131 | $p_{acs, v_{Crp, unbound}}$     | Basal expression rate | $0 g_{Prot} (g_{DW} s)^{-1}$                    |
| 132 | $p_{acs, v_{Crp, bound}}$       | Max. expression rate  | $3.9628 \cdot 10^{-8} g_{Prot} (g_{DW} s)^{-1}$ |
| 133 | $p_{acs, n}$                    | Hill coefficient      | 2.31                                            |
| 134 | $p_{acs, K_{Crp}}$              | Affinity constant     | $4.7 \cdot 10^{-3} g_{Prot} g_{DW}^{-1}$        |
| 135 | $p_{akg2mal, v_{Crp, unbound}}$ | Basal expression rate | $0 g_{Prot} (g_{DW} s)^{-1}$                    |
| 136 | $p_{akg2mal, v_{Crp, bound}}$   | Max. expression rate  | $1.4 \cdot 10^{-6} g_{Prot} (g_{DW} s)^{-1}$    |
| 137 | $p_{akg2mal, K_{Crp}}$          | Affinity constant     | $0.091 g_{Prot} g_{DW}^{-1}$                    |
| 138 | $p_{akg2mal, n}$                | Hill coefficient      | 0.74                                            |
| 139 | $p_{emp, v_{Cra, unbound}}$     | Max. expression rate  | $6.1319 \cdot 10^{-7} g_{Prot} (g_{DW} s)^{-1}$ |
| 140 | $p_{emp, v_{Cra, bound}}$       | Basal expression rate | $0 g_{Prot} (g_{DW} s)^{-1}$                    |
| 141 | $p_{emp, K_{Cra}}$              | Affinity constant     | $0.09 g_{Prot} g_{DW}^{-1}$                     |
| 142 | $p_{emp, v_{Crp, unbound}}$     | Basal expression rate | $0 g_{Prot} (g_{DW} s)^{-1}$                    |
| 143 | $p_{emp, v_{Crp, bound}}$       | Max. expression rate  | $4.7 \cdot 10^{-7} g_{Prot} (g_{DW} s)^{-1}$    |
| 144 | $p_{emp, K_{Crp}}$              | Affinity constant     | $0.012 g_{Prot} g_{DW}^{-1}$                    |
| 145 | $p_{eno, v_{Cra, unbound}}$     | Max. expression rate  | $6.7036 \cdot 10^{-7} g_{Prot} (g_{DW} s)^{-1}$ |
| 146 | $p_{eno, v_{Cra, bound}}$       | Basal expression rate | $0 g_{Prot} (g_{DW} s)^{-1}$                    |
| 147 | $p_{eno, K_{Cra}}$              | Affinity constant     | $0.016 g_{Prot} g_{DW}^{-1}$                    |
| 148 | $p_{fdp, v_{Cra, unbound}}$     | Basal expression rate | $0 g_{Prot} (g_{DW} s)^{-1}$                    |
| 149 | $p_{fdp, v_{Cra, bound}}$       | Max. expression rate  | $2.1375 \cdot 10^{-8} g_{Prot} (g_{DW} s)^{-1}$ |
| 150 | $p_{fdp, K_{Cra}}$              | Affinity constant     | $1.18 \cdot 10^{-3} g_{Prot} g_{DW}^{-1}$       |
| 151 | $p_{gltA, v_{Crp, unbound}}$    | Basal expression rate | $0 g_{Prot} (g_{DW} s)^{-1}$                    |
| 152 | $p_{gltA, v_{Crp, bound}}$      | Max. expression rate  | $6.5401 \cdot 10^{-7} g_{Prot} (g_{DW} s)^{-1}$ |
| 153 | $p_{gltA, K_{Crp}}$             | Affinity constant     | $0.04 g_{Prot} g_{DW}^{-1}$                     |
| 154 | $p_{gltA, n}$                   | Hill coefficient      | 1.07                                            |
| 155 | $p_{icd, v_{Cra, unbound}}$     | Basal expression rate | $1.1 \cdot 10^{-7} g_{Prot} (g_{DW} s)^{-1}$    |

|     |                            |                         |                                                |
|-----|----------------------------|-------------------------|------------------------------------------------|
| 156 | $\rho_{icd,vCra,bound}$    | Max. expression rate    | $8.5 \cdot 10^{-7} g_{Prot}(g_{DWS})^{-1}$     |
| 157 | $\rho_{icd,KCra}$          | Affinity constant       | $1.17 \cdot 10^{-3} g_{Prot} g_{DW}^{-1}$      |
| 158 | $\rho_{mdh,vCra,unbound}$  | Basal expression rate   | $0 g_{Prot}(g_{DWS})^{-1}$                     |
| 159 | $\rho_{mdh,vCra,bound}$    | Max. expression rate    | $1.2937 \cdot 10^{-6} g_{Prot}(g_{DWS})^{-1}$  |
| 160 | $\rho_{mdh,KCra}$          | Affinity constant       | $0.06 g_{Prot} g_{DW}^{-1}$                    |
| 161 | $\rho_{pckA,vCra,unbound}$ | Basal expression rate   | $0 g_{Prot} g_{DW}^{-1}$                       |
| 162 | $\rho_{pckA,vCra,bound}$   | Max. expression rate    | $3.6770 \cdot 10^{-7} g_{Prot}(g_{DWS})^{-1}$  |
| 163 | $\rho_{pckA,KCra}$         | Affinity constant       | $5.35 \cdot 10^{-3} g_{Prot} g_{DW}^{-1}$      |
| 164 | $\rho_{pdh,vPdhR,unbound}$ | Max. expression rate    | $7.7463 \cdot 10^{-8} g_{Prot}(g_{DWS})^{-1}$  |
| 165 | $\rho_{pdh,vPdhR,bound}$   | Basal expression rate   | $2.7973 \cdot 10^{-7} g_{Prot}(g_{DWS})^{-1}$  |
| 166 | $\rho_{pdh,KPdhR}$         | Affinity constant       | $3.4 \cdot 10^{-3} g_{Prot} g_{DW}^{-1}$       |
| 167 | $\rho_{pfkA,vCra,unbound}$ | Max. expression rate    | $1.3806 \cdot 10^{-6} g_{Prot}(g_{DWS})^{-1}$  |
| 168 | $\rho_{pfkA,vCra,bound}$   | Basal expression rate   | $1.1112 \cdot 10^{-8} g_{Prot}(g_{DWS})^{-1}$  |
| 169 | $\rho_{pfkA,KCra}$         | Affinity constant       | $6.3 \cdot 10^{-7} g_{Prot} g_{DW}^{-1}$       |
| 170 | $\rho_{ppsA,vCra,unbound}$ | Basal expression rate   | $0 g_{Prot}(g_{DWS})^{-1}$                     |
| 171 | $\rho_{ppsA,vCra,bound}$   | Max. expression rate    | $3.3 \cdot 10^{-6} g_{Prot}(g_{DWS})^{-1}$     |
| 172 | $\rho_{ppsA,KCra}$         | Affinity constant       | $0.017 g_{Prot} g_{DW}^{-1}$                   |
| 173 | $\rho_{pykF,vCra,unbound}$ | Max. expression rate    | $1.6324 \cdot 10^{-7} g_{Prot}(g_{DWS})^{-1}$  |
| 174 | $\rho_{pykF,vCra,bound}$   | Basal expression rate   | $8.7901 \cdot 10^{-10} g_{Prot}(g_{DWS})^{-1}$ |
| 175 | $\rho_{pykF,KCra}$         | Affinity constant       | $2.3 \cdot 10^{-3} g_{Prot} g_{DW}^{-1}$       |
| 176 | $\rho_D, K_{degr}$         | Univ. prot. degr. rate  | $2.8 \cdot 10^{-5} s^{-1}$                     |
| 177 | $\rho_{BM}, K_{expr}$      | Gene expr. rate const.  | $2.0 \cdot 10^4 s$                             |
| 178 | $\rho_{BM}, \mu_{ACT}$     | Growth rate on acetate  | $5.6 \cdot 10^{-5} s^{-1}$                     |
| 179 | $\rho_{BM}, \mu_{GLC}$     | Growth rate on glucose  | $1.8 \cdot 10^{-4} s^{-1}$                     |
| 180 | $\rho_{BM}, GLC_{AcOA}$    | 1st order rate constant | $1.88 s^{-1}$                                  |
| 181 | $\rho_{BM}, GLC_{AKG}$     | 1st order rate constant | $0.978 s^{-1}$                                 |
| 182 | $\rho_{BM}, GLC_{G6P}$     | 1st order rate constant | $0.154 s^{-1}$                                 |
| 183 | $\rho_{BM}, GLC_{OAA}$     | 1st order rate constant | $6.4 s^{-1}$                                   |
| 184 | $\rho_{BM}, GLC_{PEP}$     | 1st order rate constant | $0.423 s^{-1}$                                 |
| 185 | $\rho_{BM}, GLC_{PG3}$     | 1st order rate constant | $0.049 s^{-1}$                                 |
| 186 | $\rho_{BM}, GLC_{PYR}$     | 1st order rate constant | $0.553 s^{-1}$                                 |
| 187 | $\rho_{BM}, ACT_{AcOA}$    | 1st order rate constant | $0.108 s^{-1}$                                 |
| 188 | $\rho_{BM}, ACT_{AKG}$     | 1st order rate constant | $0.056 s^{-1}$                                 |
| 189 | $\rho_{BM}, ACT_{G6P}$     | 1st order rate constant | $0.076 s^{-1}$                                 |
| 190 | $\rho_{BM}, ACT_{OOA}$     | 1st order rate constant | $1.43 s^{-1}$                                  |
| 191 | $\rho_{BM}, ACT_{PEP}$     | 1st order rate constant | $0.047 s^{-1}$                                 |
| 192 | $\rho_{BM}, ACT_{PG3}$     | 1st order rate constant | $0.066 s^{-1}$                                 |
| 193 | $\rho_{BM}, ACT_{PYR}$     | 1st order rate constant | $5.185 s^{-1}$                                 |

**Table S18.** Benchmark 3: model outputs (states)

| Number | Name       | Description                                            |
|--------|------------|--------------------------------------------------------|
| 1      | xOD        | Biomass concentration                                  |
| 2      | xxACT      | Extracellular acetate                                  |
| 3      | xxGLC      | Extracellular glucose                                  |
| 4      | xxACoA     | Acetyl-CoA                                             |
| 5      | xxAKG      | $\alpha$ -Ketoglutarate                                |
| 6      | xxcAMP     | Cyclic AMP                                             |
| 7      | xxFBP      | Fructose-1,6-bisphosphate                              |
| 8      | xxG6P      | Glucose-6-phosphate                                    |
| 9      | xxGLX      | Glyoxylate                                             |
| 10     | xxICT      | Isocitrate                                             |
| 11     | xxMAL      | Malate                                                 |
| 12     | xxOAA      | Oxaloacetate                                           |
| 13     | xxPEP      | Phosphoenolpyruvate                                    |
| 14     | xxPG3      | 3-Phosphoglycerate                                     |
| 15     | xxPY       | R Pyruvate                                             |
| 16     | xxAceA     | Isocitrate lyase                                       |
| 17     | xxAceB     | Malate synthase A                                      |
| 18     | xxAceK     | Isocitrate dehydrogenase phosphatase/kinase            |
| 19     | xxacoa2act | Enzyme for the reaction from ACoA to ACT               |
| 20     | xxAcs      | Acetyl-CoA synthetase                                  |
| 21     | xxAkg2mal  | Enzyme for the reaction from AKG to MAL                |
| 22     | xxCAMPdegr | Degradation of cAMP                                    |
| 23     | xxCya      | Adenylate cyclase                                      |
| 24     | xxEmp      | Enzyme for the reversible reaction between FBP and PG3 |
| 25     | xxEno      | Enolase                                                |
| 26     | xxFdp      | Fructose-1,6-bisphosphatase I                          |
| 27     | xxGltA     | Citrate synthase                                       |
| 28     | xxIcd      | Unphosphorylated isocitrate dehydrogenase              |
| 29     | xxIcd-P    | Phosphorylated isocitrate dehydrogenase                |
| 30     | xxMaeAB    | Malic enzymes MaeAB                                    |
| 31     | xxMdh      | Malate dehydrogenase                                   |
| 32     | xxPckA     | Phosphoenolpyruvate carboxykinase                      |
| 33     | xxPdh      | Pyruvate dehydrogenase                                 |
| 34     | xxPfkA     | 6-phosphofructokinase I                                |
| 35     | xxPpc      | Phosphoenolpyruvate carboxylase                        |
| 36     | xxPpsA     | Phosphoenolpyruvate synthase                           |
| 37     | xxPykF     | Pyruvate kinase I                                      |
| 38     | xxEIIA     | Unphosphorylated PTS protein EIIA                      |
| 39     | xxEIIA-P   | Phosphorylated PTS protein EIIA                        |
| 40     | xxEIICB    | PTS protein EIICB                                      |
| 41     | xxCra      | Free Cra                                               |
| 42     | xxCraFBP   | Cra bound to fructose-1,6-bisphosphate                 |
| 43     | xxCrp      | Free Crp                                               |
| 44     | xxCrpcAMP  | Crp bound to cyclic AMP                                |
| 45     | xxIclR     | IclR                                                   |
| 46     | xxPdhR     | free PdhR                                              |
| 47     | xxPdhRPYR  | PdhR bound to pyruvate                                 |

## 4.4 B4: CHO

Table S19. Benchmark 4: parameter values

| Param. number | Parameter name                              | Param. value           |
|---------------|---------------------------------------------|------------------------|
| 1             | Km_Subset4_D-Glycerate_3-phosphate_c        | 1000 $\mu\text{mol}/l$ |
| 2             | Km_Subset4_NAD_c                            | 1000 $\mu\text{mol}/l$ |
| 3             | Km_Subset4_L-Glutamate_c                    | 1000 $\mu\text{mol}/l$ |
| 4             | Km_Subset4_L-Leucine_c                      | 1000 $\mu\text{mol}/l$ |
| 5             | Km_Subset4_L-Methionine_c                   | 1000 $\mu\text{mol}/l$ |
| 6             | Km_Subset4_L-Aspartate_c                    | 1000 $\mu\text{mol}/l$ |
| 7             | Km_Subset4_L-Glutamine_c                    | 1000 $\mu\text{mol}/l$ |
| 8             | Km_Subset4_ATP_c                            | 1000 $\mu\text{mol}/l$ |
| 9             | e_substrate_Glud1_2-Oxoglutarate_m          | 1                      |
| 10            | e_substrate_Glud1_NADH_m                    | 1                      |
| 11            | e_product_Glud1_L-Glutamate_m               | $-7 \cdot 10^{-1}$     |
| 12            | e_product_Glud1_NAD_m                       | $-7 \cdot 10^{-1}$     |
| 13            | e_substrate_Glul_L-Glutamate_c              | $7 \cdot 10^{-1}$      |
| 14            | e_substrate_Glul_ATP_c                      | $7 \cdot 10^{-1}$      |
| 15            | e_product_Glul_L-Glutamine_c                | $-2 \cdot 10^{-1}$     |
| 16            | e_product_Glul_ADP_c                        | $-2 \cdot 10^{-1}$     |
| 17            | e_substrate_Got2_Oxaloacetate_m             | 1                      |
| 18            | e_substrate_Got2_L-Glutamate_m              | 1                      |
| 19            | e_product_Got2_2-Oxoglutarate_m             | $-7 \cdot 10^{-1}$     |
| 20            | e_product_Got2_L-Aspartate_m                | $-7 \cdot 10^{-1}$     |
| 21            | e_activator_Got2_L-Malate_m                 | $5 \cdot 10^{-2}$      |
| 22            | e_substrate_Mdh2_L-Malate_m                 | 1                      |
| 23            | e_substrate_Mdh2_NAD_m                      | $5 \cdot 10^{-1}$      |
| 24            | e_product_Mdh2_Oxaloacetate_m               | $-7 \cdot 10^{-1}$     |
| 25            | e_product_Mdh2_NADH_m                       | $-5 \cdot 10^{-1}$     |
| 26            | e_substrate_ND1_a_NADH_m                    | 2                      |
| 27            | e_substrate_ND1_a_CoQ_m                     | $7 \cdot 10^{-1}$      |
| 28            | e_substrate_ND1_a_H_in_m                    | $7 \cdot 10^{-1}$      |
| 29            | e_product_ND1_a_NAD_m                       | -2                     |
| 30            | e_product_ND1_a_CoQH_radical_m              | $-2 \cdot 10^{-1}$     |
| 31            | e_product_ND1_a_H_out_m                     | $-2 \cdot 10^{-1}$     |
| 32            | e_substrate_Pklr_Phosphoenolpyruvate_c      | 1                      |
| 33            | e_substrate_Pklr_ADP_c                      | $7 \cdot 10^{-1}$      |
| 34            | e_product_Pklr_Pyruvate_c                   | $-2 \cdot 10^{-1}$     |
| 35            | e_product_Pklr_ATP_c                        | $-2.1 \cdot 10^{-1}$   |
| 36            | e_substrate_Subset0_Oxaloacetate_m          | 1                      |
| 37            | e_substrate_Subset0_NAD_m                   | $7 \cdot 10^{-1}$      |
| 38            | e_substrate_Subset0_Pyruvate_c              | 1                      |
| 39            | e_product_Subset0_2-Oxoglutarate_m          | $-2 \cdot 10^{-1}$     |
| 40            | e_product_Subset0_NADH_m                    | $-2 \cdot 10^{-1}$     |
| 41            | e_activator_Subset0_ADP_m                   | $5 \cdot 10^{-2}$      |
| 42            | e_inhibitor_Subset0_ATP_m                   | $-1 \cdot 10^{-2}$     |
| 43            | e_substrate_Subset1_NAD_c                   | $7 \cdot 10^{-1}$      |
| 44            | e_substrate_Subset1_beta-D-Glucose_c        | 1                      |
| 45            | e_product_Subset1_NADH_c                    | $-5 \cdot 10^{-1}$     |
| 46            | e_product_Subset1_D-Glycerate_3-phosphate_c | -1                     |
| 47            | e_activator_Subset1_ADP_c                   | $4 \cdot 10^{-2}$      |
| 48            | e_inhibitor_Subset1_ADP_c                   | $-1 \cdot 10^{-2}$     |

|     |                                                |                      |
|-----|------------------------------------------------|----------------------|
| 49  | e_inhibitor_Subset1_ATP_c                      | $-1 \cdot 10^{-2}$   |
| 50  | e_inhibitor_Subset1_Phosphoenolpyruvate_c      | $-1 \cdot 10^{-2}$   |
| 51  | e_substrate_Subset2_2-Oxoglutarate_c           | 1                    |
| 52  | e_substrate_Subset2_L-Aspartate_c              | 1                    |
| 53  | e_substrate_Subset2_NADH_c                     | $5 \cdot 10^{-1}$    |
| 54  | e_product_Subset2_L-Glutamate_c                | -1                   |
| 55  | e_product_Subset2_L-Malate_c                   | -1                   |
| 56  | e_product_Subset2_NAD_c                        | $-5 \cdot 10^{-1}$   |
| 57  | e_activator_Subset2_L-Malate_c                 | $1 \cdot 10^{-1}$    |
| 58  | e_inhibitor_Subset2_L-Glutamine_c              | $-1 \cdot 10^{-1}$   |
| 59  | e_substrate_Subset26_ADP_m                     | $5 \cdot 10^{-1}$    |
| 60  | e_substrate_Subset26_Phosphoenolpyruvate_c     | 1                    |
| 61  | e_substrate_Subset26_L-Malate_m                | 1                    |
| 62  | e_product_Subset26_Oxaloacetate_m              | -1                   |
| 63  | e_product_Subset26_ATP_m                       | $-3 \cdot 10^{-1}$   |
| 64  | e_product_Subset26_L-Malate_c                  | -1                   |
| 65  | e_substrate_Subset3_Pyruvate_c                 | 1                    |
| 66  | e_substrate_Subset3_NADH_c                     | $7 \cdot 10^{-1}$    |
| 67  | e_product_Subset3_L-Lactate_f                  | $-4 \cdot 10^{-1}$   |
| 68  | e_product_Subset3_NAD_c                        | $-7 \cdot 10^{-1}$   |
| 69  | e_substrate_Subset35_D-Glycerate_3-phosphate_c | 1                    |
| 70  | e_product_Subset35_Phosphoenolpyruvate_c       | $-7 \cdot 10^{-1}$   |
| 71  | e_substrate_Subset37_H_in_m                    | $7 \cdot 10^{-1}$    |
| 72  | e_substrate_Subset37_CoQH_radical_m            | 2                    |
| 73  | e_product_Subset37_H_out_m                     | $-2 \cdot 10^{-1}$   |
| 74  | e_product_Subset37_CoQ_m                       | -2                   |
| 75  | e_substrate_Subset5_2-Oxoglutarate_m           | 1                    |
| 76  | e_substrate_Subset5_NAD_m                      | $7 \cdot 10^{-1}$    |
| 77  | e_substrate_Subset5_CoQ_m                      | $7 \cdot 10^{-1}$    |
| 78  | e_substrate_Subset5_Orthophosphate_m           | $2 \cdot 10^{-1}$    |
| 79  | e_substrate_Subset5_ADP_m                      | $7 \cdot 10^{-1}$    |
| 80  | e_product_Subset5_L-Malate_m                   | $-5 \cdot 10^{-1}$   |
| 81  | e_product_Subset5_NADH_m                       | $-2.1 \cdot 10^{-1}$ |
| 82  | e_product_Subset5_CoQH_radical_m               | $-2 \cdot 10^{-1}$   |
| 83  | e_product_Subset5_ATP_m                        | $-2 \cdot 10^{-1}$   |
| 84  | e_inhibitor_Subset5_Oxaloacetate_m             | $-1 \cdot 10^{-2}$   |
| 85  | e_substrate_adencarr_ADP_c                     | 2                    |
| 86  | e_substrate_adencarr_ATP_m                     | 2                    |
| 87  | e_product_adencarr_ADP_m                       | -2                   |
| 88  | e_product_adencarr_ATP_c                       | -2                   |
| 89  | e_substrate_akgcarr_2-Oxoglutarate_m           | 2                    |
| 90  | e_substrate_akgcarr_L-Malate_c                 | 2                    |
| 91  | e_product_akgcarr_2-Oxoglutarate_c             | -2                   |
| 92  | e_product_akgcarr_L-Malate_m                   | -2                   |
| 93  | e_substrate_aspglucarr_L-Aspartate_m           | 1                    |
| 94  | e_substrate_aspglucarr_L-Glutamate_c           | 1                    |
| 95  | e_product_aspglucarr_L-Aspartate_c             | -1                   |
| 96  | e_product_aspglucarr_L-Glutamate_m             | -1                   |
| 97  | e_substrate_atpase_ATP_c                       | 1                    |
| 98  | e_product_atpase_ADP_c                         | $-5 \cdot 10^{-1}$   |
| 99  | e_substrate_atpase1_ADP_m                      | $7 \cdot 10^{-1}$    |
| 100 | e_substrate_atpase1_Orthophosphate_m           | $7 \cdot 10^{-1}$    |
| 101 | e_substrate_atpase1_H_out_m                    | 2                    |
| 102 | e_product_atpase1_ATP_m                        | $-2 \cdot 10^{-1}$   |

|     |                                       |                    |
|-----|---------------------------------------|--------------------|
| 103 | e_product_atpase1_H_in_m              | -2                 |
| 104 | e_substrate_dicarr_L-Malate_c         | 1                  |
| 105 | e_substrate_dicarr_Orthophosphate_m   | 1                  |
| 106 | e_product_dicarr_L-Malate_m           | $-7 \cdot 10^{-1}$ |
| 107 | e_substrate_feed_glc_beta-D-Glucose_f | 1                  |
| 108 | e_product_feed_glc_beta-D-Glucose_c   | $-7 \cdot 10^{-1}$ |
| 109 | e_substrate_feed_leu_L-Leucine_f      | 1                  |
| 110 | e_product_feed_leu_L-Leucine_c        | $-7 \cdot 10^{-1}$ |
| 111 | e_substrate_feed_met_L-Methionine_f   | 1                  |
| 112 | e_product_feed_met_L-Methionine_c     | $-7 \cdot 10^{-1}$ |
| 113 | e_substrate_glucarr_L-Glutamate_m     | 2                  |
| 114 | e_product_glucarr_L-Glutamate_c       | -2                 |
| 115 | e_substrate_mitphocarr_H_out_m        | $7 \cdot 10^{-1}$  |
| 116 | e_product_mitphocarr_Orthophosphate_m | $-2 \cdot 10^{-1}$ |
| 117 | e_product_mitphocarr_H_in_m           | $-2 \cdot 10^{-1}$ |

**Table S20.** Benchmark 4: model outputs (metabolite concentrations)

| Number | Metabolite                        |
|--------|-----------------------------------|
| 1      | beta-D-Glucose (fermenter)        |
| 2      | L-Lactate (fermenter)             |
| 3      | L-Leucine (fermenter)             |
| 4      | L-Methionine (fermenter)          |
| 5      | Productprotein (fermenter)        |
| 6      | L-Glutamate (mitochondria)        |
| 7      | NAD (mitochondria)                |
| 8      | 2-Oxoglutarate (mitochondria)     |
| 9      | NADH (mitochondria)               |
| 10     | L-Glutamine (cytosol)             |
| 11     | ADP (cytosol)                     |
| 12     | L-Glutamate (cytosol)             |
| 13     | ATP (cytosol)                     |
| 14     | L-Aspartate (mitochondria)        |
| 15     | Oxaloacetate (mitochondria)       |
| 16     | L-Malate (mitochondria)           |
| 17     | CoQH_radical (mitochondria)       |
| 18     | H_out (mitochondria)              |
| 19     | CoQ (mitochondria)                |
| 20     | H_in (mitochondria)               |
| 21     | Pyruvate (cytosol)                |
| 22     | Phosphoenolpyruvate (cytosol)     |
| 23     | NADH (cytosol)                    |
| 24     | D-Glycerate.3-phosphate (cytosol) |
| 25     | NAD (cytosol)                     |
| 26     | beta-D-Glucose (cytosol)          |
| 27     | L-Malate (cytosol)                |
| 28     | 2-Oxoglutarate (cytosol)          |
| 29     | L-Aspartate (cytosol)             |
| 30     | ATP (mitochondria)                |
| 31     | Orthophosphate (mitochondria)     |
| 32     | ADP (mitochondria)                |
| 33     | L-Leucine (cytosol)               |
| 34     | L-Methionine (cytosol)            |

## 4.5 B5: signal transduction logic model

**Table S21.** Benchmark 5: parameter values

| Param. name           | Param. # | Param. value           |
|-----------------------|----------|------------------------|
| <i>map3k7_n_nik</i>   | p1       | 1.0000                 |
| <i>map3k7_k_nik</i>   | p2       | $9.0500 \cdot 10^{-2}$ |
| <i>tau_nik</i>        | p3       | 7.1398                 |
| <i>map3k7_n_mkk4</i>  | p4       | 1.0900                 |
| <i>map3k7_k_mkk4</i>  | p5       | $9.5000 \cdot 10^{-1}$ |
| <i>map3k1_n_mkk4</i>  | p6       | 3.1526                 |
| <i>map3k1_k_mkk4</i>  | p7       | $4.7210 \cdot 10^{-1}$ |
| <i>tau_mkk4</i>       | p8       | 5.4167                 |
| <i>traf2_n_ask1</i>   | p9       | 3.4873                 |
| <i>traf2_k_ask1</i>   | p10      | $1.5000 \cdot 10^{-1}$ |
| <i>tau_ask1</i>       | p11      | 5.2731                 |
| <i>traf2_n_map3k7</i> | p12      | 1.0000                 |
| <i>traf2_k_map3k7</i> | p13      | $9.1800 \cdot 10^{-2}$ |
| <i>tau_map3k7</i>     | p14      | $1.0000 \cdot 10^{-1}$ |
| <i>ask1_n_mkk7</i>    | p15      | 3.5966                 |
| <i>ask1_k_mkk7</i>    | p16      | $7.7720 \cdot 10^{-1}$ |
| <i>map3k1_n_mkk7</i>  | p17      | 3.9788                 |
| <i>map3k1_k_mkk7</i>  | p18      | $4.0260 \cdot 10^{-1}$ |
| <i>tau_mkk7</i>       | p19      | $1.0000 \cdot 10^1$    |
| <i>tnfa_n_tnfr</i>    | p20      | 1.0188                 |
| <i>tnfa_k_tnfr</i>    | p21      | $1.1730 \cdot 10^{-1}$ |
| <i>tau_tnfr</i>       | p22      | 9.1369                 |
| <i>egf_n_egfr</i>     | p23      | 4.8920                 |
| <i>egf_k_egfr</i>     | p24      | $9.0500 \cdot 10^{-2}$ |
| <i>tau_egfr</i>       | p25      | 1.0937                 |
| <i>erk_n_ph</i>       | p26      | 4.6110                 |
| <i>erk_k_ph</i>       | p27      | $1.0270 \cdot 10^{-1}$ |
| <i>tau_ph</i>         | p28      | $1.0600 \cdot 10^{-1}$ |
| <i>nfbk_n_ex</i>      | p29      | 4.9909                 |
| <i>nfbk_k_ex</i>      | p30      | $4.2680 \cdot 10^{-1}$ |
| <i>tau_ex</i>         | p31      | $6.1460 \cdot 10^{-1}$ |
| <i>raf1_n_mek</i>     | p32      | 1.4875                 |
| <i>raf1_k_mek</i>     | p33      | $5.1950 \cdot 10^{-1}$ |
| <i>tau_mek</i>        | p34      | 9.5228                 |
| <i>sos_n_ras</i>      | p35      | 1.4540                 |
| <i>sos_k_ras</i>      | p36      | $7.1190 \cdot 10^{-1}$ |
| <i>tau_ras</i>        | p37      | 2.8385                 |
| <i>tnfr_n_traf2</i>   | p38      | 4.1622                 |
| <i>tnfr_k_traf2</i>   | p39      | $5.4760 \cdot 10^{-1}$ |
| <i>tau_traf2</i>      | p40      | 9.9362                 |
| <i>nik_n_ikk</i>      | p41      | 4.9970                 |
| <i>nik_k_ikk</i>      | p42      | $1.0290 \cdot 10^{-1}$ |
| <i>tau_ikk</i>        | p43      | 5.7463                 |
| <i>pi3k_n_akt</i>     | p44      | 1.0726                 |
| <i>pi3k_k_akt</i>     | p45      | $9.4860 \cdot 10^{-1}$ |
| <i>tau_akt</i>        | p46      | 9.5917                 |
| <i>egfr_n_pi3k</i>    | p47      | 4.4151                 |
| <i>egfr_k_pi3k</i>    | p48      | $9.4400 \cdot 10^{-2}$ |
| <i>tau_pi3k</i>       | p49      | 7.7292                 |



|                     |     |                        |
|---------------------|-----|------------------------|
| <i>ex_n_ikb</i>     | p50 | 4.9991                 |
| <i>ex_k_ikb</i>     | p51 | $6.8520 \cdot 10^{-1}$ |
| <i>ikk_n_ikb</i>    | p52 | 1.5451                 |
| <i>ikk_k_ikb</i>    | p53 | $9.5000 \cdot 10^{-1}$ |
| <i>tau_ikb</i>      | p54 | $6.7780 \cdot 10^{-1}$ |
| <i>ikb_n_nfkb</i>   | p55 | 4.9997                 |
| <i>ikb_k_nfkb</i>   | p56 | $2.3290 \cdot 10^{-1}$ |
| <i>tau_nfkb</i>     | p57 | $9.9840 \cdot 10^{-1}$ |
| <i>jnk_n_cjun</i>   | p58 | 1.0759                 |
| <i>jnk_k_cjun</i>   | p59 | $9.4960 \cdot 10^{-1}$ |
| <i>tau_cjun</i>     | p60 | 9.6513                 |
| <i>mkk7_n_jnk</i>   | p61 | 4.8747                 |
| <i>mkk7_k_jnk</i>   | p62 | $9.1300 \cdot 10^{-2}$ |
| <i>tau_jnk</i>      | p63 | 1.3215                 |
| <i>ras_n_map3k1</i> | p64 | 1.1997                 |
| <i>ras_k_map3k1</i> | p65 | $8.2980 \cdot 10^{-1}$ |
| <i>tau_map3k1</i>   | p66 | 9.9950                 |
| <i>mek_n_erk</i>    | p67 | 2.5354                 |
| <i>mek_k_erk</i>    | p68 | $7.0990 \cdot 10^{-1}$ |
| <i>tau_erk</i>      | p69 | $1.0000 \cdot 10^1$    |
| <i>ras_n_raf1</i>   | p70 | 1.0000                 |
| <i>ras_k_raf1</i>   | p71 | $2.7250 \cdot 10^{-1}$ |
| <i>tau_raf1</i>     | p72 | $8.5520 \cdot 10^{-1}$ |
| <i>egfr_n_sos</i>   | p73 | 1.1200                 |
| <i>egfr_k_sos</i>   | p74 | $9.3750 \cdot 10^{-1}$ |
| <i>ph_n_sos</i>     | p75 | 1.4651                 |
| <i>ph_k_sos</i>     | p76 | $7.2000 \cdot 10^{-1}$ |
| <i>tau_sos</i>      | p77 | 9.3196                 |
| <i>mkk4_n_p38</i>   | p78 | 1.3200                 |
| <i>mkk4_k_p38</i>   | p79 | $9.3290 \cdot 10^{-1}$ |
| <i>tau_p38</i>      | p80 | $1.0000 \cdot 10^{-1}$ |
| <i>akt_n_gsk3</i>   | p81 | 1.0608                 |
| <i>akt_k_gsk3</i>   | p82 | $9.0000 \cdot 10^{-2}$ |
| <i>tau_gsk3</i>     | p83 | $2.6020 \cdot 10^{-1}$ |
| <i>cjun_n_ap1</i>   | p84 | 4.7985                 |
| <i>cjun_k_ap1</i>   | p85 | $2.6530 \cdot 10^{-1}$ |
| <i>tau_ap1</i>      | p86 | $2.0450 \cdot 10^{-1}$ |

**Table S22.** Benchmark 5: model outputs

| Observable Number | Signals | State Number |
|-------------------|---------|--------------|
| 1                 | raf1    | 19           |
| 2                 | erk     | 21           |
| 3                 | ap1     | 26           |
| 4                 | gsk3    | 25           |
| 5                 | p38     | 24           |
| 6                 | nfkb    | 7            |

4.6 B6: *Drosophila*

Table S23. Benchmark 6: parameter values

| Param. name | Description                             | Param. # | Value       |
|-------------|-----------------------------------------|----------|-------------|
| $R_1$       | promoter strength for gap gene 1        | p1       | 12.48991375 |
| $R_2$       | promoter strength for gap gene 2        | p2       | 26.64956536 |
| $R_3$       | promoter strength for gap gene 3        | p3       | 24.21400803 |
| $R_4$       | promoter strength for gap gene 4        | p4       | 19.14696636 |
| $T(1, 1)$   | effect of gap gene 1 on gap gene 1      | p5       | -0.02875641 |
| $T(1, 2)$   | effect of gap gene 1 on gap gene 2      | p6       | 0.03773355  |
| $T(1, 3)$   | effect of gap gene 1 on gap gene 3      | p7       | -0.08696411 |
| $T(1, 4)$   | effect of gap gene 1 on gap gene 4      | p8       | 0.02085833  |
| $T(2, 1)$   | effect of gap gene 2 on gap gene 1      | p9       | 0.07752513  |
| $T(2, 2)$   | effect of gap gene 2 on gap gene 2      | p10      | -0.05127861 |
| $T(2, 3)$   | effect of gap gene 2 on gap gene 3      | p11      | 0.08351538  |
| $T(2, 4)$   | effect of gap gene 2 on gap gene 4      | p12      | -0.03693460 |
| $T(3, 1)$   | effect of gap gene 3 on gap gene 1      | p13      | -0.02272315 |
| $T(3, 2)$   | effect of gap gene 3 on gap gene 2      | p14      | -0.05630814 |
| $T(3, 3)$   | effect of gap gene 3 on gap gene 3      | p15      | 0.03840626  |
| $T(3, 4)$   | effect of gap gene 3 on gap gene 4      | p16      | 0.07150631  |
| $T(4, 1)$   | effect of gap gene 4 on gap gene 1      | p17      | 0.02276078  |
| $T(4, 2)$   | effect of gap gene 4 on gap gene 2      | p18      | -0.02350780 |
| $T(4, 3)$   | effect of gap gene 4 on gap gene 3      | p19      | 0.01856495  |
| $T(4, 4)$   | effect of gap gene 4 on gap gene 4      | p20      | -0.06116937 |
| $E(1, 1)$   | effect of external gene 1 on gap gene 1 | p21      | -0.14654266 |
| $E(1, 2)$   | effect of external gene 1 on gap gene 2 | p22      | 0.01651517  |
| $E(1, 3)$   | effect of external gene 1 on gap gene 3 | p23      | 0.06442419  |
| $E(1, 4)$   | effect of external gene 1 on gap gene 4 | p24      | -0.05467585 |
| $E(2, 1)$   | effect of external gene 2 on gap gene 1 | p25      | -0.12247616 |
| $E(2, 2)$   | effect of external gene 2 on gap gene 2 | p26      | -0.10550997 |
| $E(2, 3)$   | effect of external gene 2 on gap gene 3 | p27      | 0.10687539  |
| $E(3, 1)$   | effect of external gene 3 on gap gene 1 | p28      | 0.02896215  |
| $E(3, 2)$   | effect of external gene 3 on gap gene 2 | p29      | -0.07365022 |
| $E(3, 3)$   | effect of external gene 3 on gap gene 3 | p30      | -0.06193835 |
| $E(4, 1)$   | effect of external gene 4 on gap gene 1 | p31      | 0.02710513  |
| $E(4, 2)$   | effect of external gene 4 on gap gene 2 | p32      | -0.04491538 |
| $E(4, 3)$   | effect of external gene 4 on gap gene 3 | p33      | 0.10493181  |
| $\lambda_1$ | decay rate of gap gene 1                | p34      | 13.76469068 |
| $\lambda_2$ | decay rate of gap gene 2                | p35      | 7.27890037  |
| $\lambda_3$ | decay rate of gap gene 3                | p36      | 11.63317492 |
| $\lambda_4$ | decay rate of gap gene 4                | p37      | 12.03105457 |

The observables of model 6 are the expression levels of the four gap genes: hunchback (hb), Krüppel (Kr), giant (gt), and knirps (kni). In the data table, horizontal lines divide data obtained at different time points.

**Table S24.** Benchmark 6: data

| lin  | t      | hb     | Kr     | gt     | kni    |
|------|--------|--------|--------|--------|--------|
| 4113 | 10.55  | 130.56 | 0      | 103.74 | 0      |
| 4114 | 10.55  | 133.65 | 0      | 98.88  | 0      |
| 4115 | 10.55  | 136.74 | 0      | 78.18  | 0      |
| 4116 | 10.55  | 139.42 | 0      | 48.74  | 0      |
| 4117 | 10.55  | 130.43 | 0.79   | 19.75  | 0      |
| 4118 | 10.55  | 103.55 | 16.15  | 1.85   | 0      |
| 4119 | 10.55  | 67.11  | 49.53  | 0      | 0      |
| 4120 | 10.55  | 30.69  | 88.23  | 0      | 0      |
| 4121 | 10.55  | 4.62   | 115.77 | 0      | 0      |
| 4122 | 10.55  | 0      | 118.49 | 0      | 0      |
| 4123 | 10.55  | 0      | 115.21 | 0      | 2.52   |
| 4124 | 10.55  | 0      | 100.6  | 0      | 22.34  |
| 4125 | 10.55  | 0      | 73.59  | 0      | 54.24  |
| 4126 | 10.55  | 0      | 42.74  | 0      | 85.44  |
| 4127 | 10.55  | 0      | 16     | 0      | 103.77 |
| 4128 | 10.55  | 0      | 1.25   | 0      | 103.75 |
| 4129 | 10.55  | 0      | 0      | 0      | 101.3  |
| 4130 | 10.55  | 0      | 0      | 0.34   | 96.86  |
| 4131 | 10.55  | 0      | 0      | 8.16   | 75.51  |
| 4132 | 10.55  | 0      | 0      | 25.8   | 42.33  |
| 4133 | 10.55  | 0      | 0      | 47.47  | 12.47  |
| 4134 | 10.55  | 0      | 0      | 67.7   | 0      |
| 4135 | 10.55  | 0      | 0      | 81.62  | 0      |
| 4136 | 10.55  | 0      | 0      | 84.11  | 0      |
| 4137 | 10.55  | 0      | 0      | 81.65  | 0      |
| 4138 | 10.55  | 0      | 0      | 79.2   | 0      |
| 4139 | 10.55  | 0.68   | 0      | 76.74  | 0      |
| 8227 | 24.225 | 159.89 | 0      | 148.7  | 0      |
| 8228 | 24.225 | 161.77 | 0      | 146.09 | 0      |
| 8229 | 24.225 | 163.65 | 0      | 134.47 | 0      |
| 8230 | 24.225 | 165.54 | 0      | 115.97 | 0      |
| 8231 | 24.225 | 164.81 | 0      | 92.9   | 0      |
| 8232 | 24.225 | 158.26 | 0      | 67.69  | 0      |
| 8233 | 24.225 | 146.76 | 0.27   | 42.87  | 0      |
| 8234 | 24.225 | 131.29 | 7.98   | 21.07  | 0      |
| 8235 | 24.225 | 112.88 | 24.64  | 5.07   | 0      |
| 8236 | 24.225 | 92.59  | 47.86  | 0      | 0      |
| 8237 | 24.225 | 71.55  | 75.15  | 0      | 0      |
| 8238 | 24.225 | 50.94  | 103.91 | 0      | 0      |
| 8239 | 24.225 | 31.96  | 131.4  | 0      | 0      |
| 8240 | 24.225 | 15.9   | 154.8  | 0      | 0      |
| 8241 | 24.225 | 4.06   | 171.16 | 0      | 0      |
| 8242 | 24.225 | 0      | 173.19 | 0      | 0      |
| 8243 | 24.225 | 0      | 171.44 | 0      | 0      |
| 8244 | 24.225 | 0      | 169.69 | 0      | 0      |
| 8245 | 24.225 | 0      | 167.94 | 0      | 3.56   |
| 8246 | 24.225 | 0      | 165.75 | 0      | 16.68  |

|      |        |        |        |        |        |
|------|--------|--------|--------|--------|--------|
| 8247 | 24.225 | 0      | 157.09 | 0      | 36.75  |
| 8248 | 24.225 | 0      | 141.67 | 0      | 60.98  |
| 8249 | 24.225 | 0      | 121.48 | 0      | 86.72  |
| 8250 | 24.225 | 0      | 98.43  | 0      | 111.41 |
| 8251 | 24.225 | 0      | 74.37  | 0      | 132.62 |
| 8252 | 24.225 | 0      | 51.05  | 0      | 147.99 |
| 8253 | 24.225 | 0      | 30.17  | 0      | 153.95 |
| 8254 | 24.225 | 0      | 13.33  | 0      | 152.2  |
| 8255 | 24.225 | 0      | 2.05   | 0      | 150.45 |
| 8256 | 24.225 | 0      | 0      | 0      | 148.7  |
| 8257 | 24.225 | 0      | 0      | 0      | 146.95 |
| 8258 | 24.225 | 0      | 0      | 0.05   | 145.15 |
| 8259 | 24.225 | 0      | 0      | 6.72   | 137.66 |
| 8260 | 24.225 | 0      | 0      | 22.25  | 122.39 |
| 8261 | 24.225 | 0      | 0      | 43.45  | 101.89 |
| 8262 | 24.225 | 0      | 0      | 67.25  | 78.62  |
| 8263 | 24.225 | 0      | 0      | 90.76  | 54.89  |
| 8264 | 24.225 | 0      | 0      | 111.21 | 32.93  |
| 8265 | 24.225 | 0      | 0      | 125.97 | 14.83  |
| 8266 | 24.225 | 0      | 0      | 131.2  | 2.59   |
| 8267 | 24.225 | 0      | 0      | 129.45 | 0      |
| 8268 | 24.225 | 0      | 0      | 127.7  | 0      |
| 8269 | 24.225 | 0      | 0      | 125.96 | 0      |
| 8270 | 24.225 | 0      | 0      | 123.34 | 0      |
| 8271 | 24.225 | 0      | 0      | 115.11 | 0      |
| 8272 | 24.225 | 0      | 0      | 101.98 | 0      |
| 8273 | 24.225 | 0.01   | 0      | 85.57  | 0      |
| 8274 | 24.225 | 5.07   | 0      | 67.44  | 0      |
| 8275 | 24.225 | 17.45  | 0      | 49.06  | 0      |
| 8276 | 24.225 | 34.6   | 0      | 31.81  | 0      |
| 8277 | 24.225 | 54.11  | 0      | 17     | 0      |
| 8278 | 24.225 | 73.71  | 0      | 5.85   | 0      |
| 8279 | 24.225 | 91.27  | 0      | 0      | 0      |
| 8227 | 30.475 | 166.81 | 0      | 152.75 | 0      |
| 8228 | 30.475 | 168.78 | 0      | 139.39 | 0      |
| 8229 | 30.475 | 170.74 | 0      | 120.22 | 0      |
| 8230 | 30.475 | 172.7  | 0      | 97.19  | 0      |
| 8231 | 30.475 | 174.66 | 0      | 72.33  | 0      |
| 8232 | 30.475 | 176.53 | 0      | 47.78  | 0      |
| 8233 | 30.475 | 171.77 | 5.92   | 25.77  | 0      |
| 8234 | 30.475 | 157.92 | 21.91  | 8.63   | 0      |
| 8235 | 30.475 | 137.12 | 45.47  | 0      | 0      |
| 8236 | 30.475 | 111.6  | 73.96  | 0      | 0      |
| 8237 | 30.475 | 83.72  | 104.64 | 0      | 0      |
| 8238 | 30.475 | 55.92  | 134.65 | 0      | 0      |
| 8239 | 30.475 | 30.77  | 160.98 | 0      | 0      |
| 8240 | 30.475 | 10.91  | 180.53 | 0      | 0      |
| 8241 | 30.475 | 0      | 187.38 | 0      | 0      |
| 8242 | 30.475 | 0      | 187.38 | 0      | 0      |
| 8243 | 30.475 | 0      | 185.48 | 0      | 0      |
| 8244 | 30.475 | 0      | 183.59 | 0      | 0      |
| 8245 | 30.475 | 0      | 177.94 | 0      | 0      |
| 8246 | 30.475 | 0      | 165.41 | 0      | 0.89   |
| 8247 | 30.475 | 0      | 147.66 | 0      | 10.84  |

|      |        |        |        |        |        |
|------|--------|--------|--------|--------|--------|
| 8248 | 30.475 | 0      | 126.3  | 0      | 29.37  |
| 8249 | 30.475 | 0      | 102.89 | 0      | 53.53  |
| 8250 | 30.475 | 0      | 78.91  | 0      | 80.45  |
| 8251 | 30.475 | 0      | 55.8   | 0      | 107.42 |
| 8252 | 30.475 | 0      | 34.91  | 0      | 131.81 |
| 8253 | 30.475 | 0      | 17.56  | 0      | 151.12 |
| 8254 | 30.475 | 0      | 4.98   | 0      | 162.96 |
| 8255 | 30.475 | 0      | 0      | 0      | 162.77 |
| 8256 | 30.475 | 0      | 0      | 0      | 160.88 |
| 8257 | 30.475 | 0      | 0      | 0      | 158.99 |
| 8258 | 30.475 | 0      | 0      | 0      | 155.15 |
| 8259 | 30.475 | 0      | 0      | 3.61   | 144.03 |
| 8260 | 30.475 | 0      | 0      | 19.77  | 127.14 |
| 8261 | 30.475 | 0      | 0      | 44.54  | 106.4  |
| 8262 | 30.475 | 0      | 0      | 73.32  | 83.68  |
| 8263 | 30.475 | 0      | 0      | 101.71 | 60.75  |
| 8264 | 30.475 | 0      | 0      | 125.53 | 39.28  |
| 8265 | 30.475 | 0      | 0      | 140.84 | 20.87  |
| 8266 | 30.475 | 0      | 0      | 141.95 | 7.04   |
| 8267 | 30.475 | 0      | 0      | 140.06 | 0      |
| 8268 | 30.475 | 0      | 0      | 136.54 | 0      |
| 8269 | 30.475 | 0      | 0      | 124.41 | 0      |
| 8270 | 30.475 | 3.12   | 0      | 105.41 | 0      |
| 8271 | 30.475 | 15.3   | 0      | 82.44  | 0      |
| 8272 | 30.475 | 33.82  | 0      | 58.21  | 0      |
| 8273 | 30.475 | 55.76  | 0      | 35.3   | 0      |
| 8274 | 30.475 | 78.35  | 0      | 16.17  | 0      |
| 8275 | 30.475 | 98.97  | 0      | 3.08   | 0      |
| 8276 | 30.475 | 115.15 | 0      | 0      | 0      |
| 8277 | 30.475 | 124.6  | 0      | 0      | 0      |
| 8278 | 30.475 | 123.64 | 0      | 0      | 0      |
| 8279 | 30.475 | 121.67 | 0      | 0      | 0      |
| 8227 | 36.725 | 169.88 | 0      | 162.91 | 0      |
| 8228 | 36.725 | 171.88 | 0      | 146.29 | 0      |
| 8229 | 36.725 | 173.88 | 0      | 119.87 | 0      |
| 8230 | 36.725 | 175.88 | 0      | 87.91  | 0      |
| 8231 | 36.725 | 177.88 | 0      | 54.89  | 0      |
| 8232 | 36.725 | 179.88 | 0      | 25.49  | 0      |
| 8233 | 36.725 | 181.88 | 0      | 4.62   | 0      |
| 8234 | 36.725 | 183.68 | 4.55   | 0      | 0      |
| 8235 | 36.725 | 172.74 | 17.73  | 0      | 0      |
| 8236 | 36.725 | 145.74 | 37.74  | 0      | 0      |
| 8237 | 36.725 | 108.89 | 62.74  | 0      | 0      |
| 8238 | 36.725 | 68.7   | 90.76  | 0      | 0      |
| 8239 | 36.725 | 31.94  | 119.77 | 0      | 0      |
| 8240 | 36.725 | 5.67   | 147.64 | 0      | 0      |
| 8241 | 36.725 | 0      | 172.16 | 0      | 0      |
| 8242 | 36.725 | 0      | 189.11 | 0      | 0      |
| 8243 | 36.725 | 0      | 193.68 | 0      | 0      |
| 8244 | 36.725 | 0      | 191.7  | 0      | 0      |
| 8245 | 36.725 | 0      | 189.73 | 0      | 0      |
| 8246 | 36.725 | 0      | 187.75 | 0      | 0      |
| 8247 | 36.725 | 0      | 185.16 | 0      | 6.2    |
| 8248 | 36.725 | 0      | 174.21 | 0      | 24.21  |

|      |        |        |        |        |        |
|------|--------|--------|--------|--------|--------|
| 8249 | 36.725 | 0      | 154.78 | 0      | 50.14  |
| 8250 | 36.725 | 0      | 129.62 | 0      | 80.22  |
| 8251 | 36.725 | 0      | 101.34 | 0      | 110.81 |
| 8252 | 36.725 | 0      | 72.49  | 0      | 138.47 |
| 8253 | 36.725 | 0      | 45.48  | 0      | 159.87 |
| 8254 | 36.725 | 0      | 22.61  | 0      | 171.86 |
| 8255 | 36.725 | 0      | 6.09   | 0      | 169.97 |
| 8256 | 36.725 | 0      | 0      | 0      | 167.99 |
| 8257 | 36.725 | 0      | 0      | 6.06   | 166.01 |
| 8258 | 36.725 | 0      | 0      | 27.29  | 163.99 |
| 8259 | 36.725 | 0      | 0      | 57.8   | 155.19 |
| 8260 | 36.725 | 0      | 0      | 91.55  | 137.07 |
| 8261 | 36.725 | 0      | 0      | 122.78 | 112.82 |
| 8262 | 36.725 | 0      | 0      | 146.01 | 85.46  |
| 8263 | 36.725 | 0      | 0      | 154.15 | 57.88  |
| 8264 | 36.725 | 0      | 0      | 152.18 | 32.84  |
| 8265 | 36.725 | 0      | 0      | 150.18 | 12.94  |
| 8266 | 36.725 | 0      | 0      | 141.92 | 0.65   |
| 8267 | 36.725 | 0      | 0      | 124.79 | 0      |
| 8268 | 36.725 | 0      | 0      | 101.91 | 0      |
| 8269 | 36.725 | 4.24   | 0      | 76.23  | 0      |
| 8270 | 36.725 | 17.69  | 0      | 50.58  | 0      |
| 8271 | 36.725 | 37.32  | 0      | 27.61  | 0      |
| 8272 | 36.725 | 60.16  | 0      | 9.83   | 0      |
| 8273 | 36.725 | 83.38  | 0      | 0      | 0      |
| 8274 | 36.725 | 104.32 | 0      | 0      | 0      |
| 8275 | 36.725 | 120.48 | 0      | 0      | 0      |
| 8276 | 36.725 | 129.51 | 0      | 0      | 0      |
| 8277 | 36.725 | 127.91 | 0      | 0      | 0      |
| 8278 | 36.725 | 125.91 | 0      | 0      | 0      |
| 8279 | 36.725 | 123.33 | 0      | 0      | 0      |
| 8227 | 42.975 | 135.28 | 0      | 163.11 | 0      |
| 8228 | 42.975 | 136.88 | 0      | 145.09 | 0      |
| 8229 | 42.975 | 138.47 | 0      | 117.9  | 0      |
| 8230 | 42.975 | 140.06 | 0      | 85.72  | 0      |
| 8231 | 42.975 | 141.67 | 0      | 52.91  | 0      |
| 8232 | 42.975 | 146.31 | 3.41   | 24.03  | 0      |
| 8233 | 42.975 | 154.88 | 15.2   | 3.87   | 0      |
| 8234 | 42.975 | 165.49 | 33.83  | 0      | 0      |
| 8235 | 42.975 | 176.18 | 57.56  | 0      | 0      |
| 8236 | 42.975 | 184.92 | 84.55  | 0      | 0      |
| 8237 | 42.975 | 189    | 112.9  | 0      | 0      |
| 8238 | 42.975 | 149.24 | 140.61 | 0      | 0      |
| 8239 | 42.975 | 108.12 | 165.61 | 0      | 0      |
| 8240 | 42.975 | 63.55  | 185.74 | 0      | 0      |
| 8241 | 42.975 | 24.53  | 198.03 | 0      | 0      |
| 8242 | 42.975 | 0.45   | 198.03 | 0      | 0      |
| 8243 | 42.975 | 0      | 196.03 | 0      | 0      |
| 8244 | 42.975 | 0      | 194.03 | 0      | 0      |
| 8245 | 42.975 | 0      | 192.03 | 0      | 0.01   |
| 8246 | 42.975 | 0      | 185.85 | 0      | 7.82   |
| 8247 | 42.975 | 0      | 170.45 | 0      | 27.3   |
| 8248 | 42.975 | 0      | 148.3  | 0      | 54.46  |
| 8249 | 42.975 | 0      | 121.83 | 0      | 85.47  |

|      |        |        |        |        |        |
|------|--------|--------|--------|--------|--------|
| 8250 | 42.975 | 0      | 93.41  | 0      | 116.65 |
| 8251 | 42.975 | 0      | 65.29  | 0      | 144.47 |
| 8252 | 42.975 | 0      | 39.63  | 0      | 165.57 |
| 8253 | 42.975 | 0      | 18.49  | 0      | 176.03 |
| 8254 | 42.975 | 0      | 3.85   | 0      | 174.03 |
| 8255 | 42.975 | 0      | 0      | 0      | 172.03 |
| 8256 | 42.975 | 0      | 0      | 0.18   | 170.03 |
| 8257 | 42.975 | 0      | 0      | 13.11  | 158.5  |
| 8258 | 42.975 | 0      | 0      | 40.96  | 129.76 |
| 8259 | 42.975 | 0      | 0      | 76.28  | 91.92  |
| 8260 | 42.975 | 0      | 0      | 111.98 | 52.82  |
| 8261 | 42.975 | 0      | 0      | 141.31 | 19.94  |
| 8262 | 42.975 | 0      | 0      | 157.81 | 0.36   |
| 8263 | 42.975 | 0      | 0      | 156.03 | 0      |
| 8264 | 42.975 | 0      | 0      | 154.03 | 0      |
| 8265 | 42.975 | 0      | 0      | 152.03 | 0      |
| 8266 | 42.975 | 0      | 0      | 147.8  | 0      |
| 8267 | 42.975 | 0      | 0      | 132.32 | 0      |
| 8268 | 42.975 | 2.96   | 0      | 108.32 | 0      |
| 8269 | 42.975 | 17.64  | 0      | 79.95  | 0      |
| 8270 | 42.975 | 40.55  | 0      | 51.14  | 0      |
| 8271 | 42.975 | 67.3   | 0      | 25.61  | 0      |
| 8272 | 42.975 | 93.75  | 0      | 6.88   | 0      |
| 8273 | 42.975 | 115.95 | 0      | 0      | 0      |
| 8274 | 42.975 | 130.24 | 0      | 0      | 0      |
| 8275 | 42.975 | 131.31 | 0      | 0      | 0      |
| 8276 | 42.975 | 129.31 | 0      | 0      | 0      |
| 8277 | 42.975 | 127.33 | 0      | 0      | 0      |
| 8278 | 42.975 | 123.2  | 0      | 0      | 0      |
| 8279 | 42.975 | 100.41 | 0      | 0      | 0      |
| 8227 | 49.225 | 131.58 | 0      | 165.83 | 0      |
| 8228 | 49.225 | 133.13 | 0      | 150.93 | 0      |
| 8229 | 49.225 | 134.68 | 0      | 121.2  | 0      |
| 8230 | 49.225 | 136.23 | 0      | 83.58  | 0      |
| 8231 | 49.225 | 137.77 | 0      | 45.38  | 0      |
| 8232 | 49.225 | 145.57 | 0      | 14.22  | 0      |
| 8233 | 49.225 | 161.4  | 6.26   | 0      | 0      |
| 8234 | 49.225 | 175.83 | 25.26  | 0      | 0      |
| 8235 | 49.225 | 179.96 | 53.47  | 0      | 0      |
| 8236 | 49.225 | 181.89 | 87.1   | 0      | 0      |
| 8237 | 49.225 | 156.53 | 122.24 | 0      | 0      |
| 8238 | 49.225 | 91.78  | 154.75 | 0      | 0      |
| 8239 | 49.225 | 25.5   | 180.36 | 0      | 0      |
| 8240 | 49.225 | 0      | 192.54 | 0      | 0      |
| 8241 | 49.225 | 0      | 194.51 | 0      | 0      |
| 8242 | 49.225 | 0      | 194.51 | 0      | 0      |
| 8243 | 49.225 | 0      | 192.54 | 0      | 0      |
| 8244 | 49.225 | 0      | 190.58 | 0      | 0      |
| 8245 | 49.225 | 0      | 185.84 | 0      | 5.39   |
| 8246 | 49.225 | 0      | 170.66 | 0      | 23.81  |
| 8247 | 49.225 | 0      | 147.39 | 0      | 51.07  |
| 8248 | 49.225 | 0      | 119.09 | 0      | 82.9   |
| 8249 | 49.225 | 0      | 88.65  | 0      | 115.18 |
| 8250 | 49.225 | 0      | 58.89  | 0      | 143.97 |



|      |        |        |        |        |        |
|------|--------|--------|--------|--------|--------|
| 8251 | 49.225 | 0      | 32.47  | 0      | 165.51 |
| 8252 | 49.225 | 0      | 11.96  | 0      | 174.86 |
| 8253 | 49.225 | 0      | 0      | 0      | 172.9  |
| 8254 | 49.225 | 0      | 0      | 0      | 170.93 |
| 8255 | 49.225 | 0      | 0      | 0      | 168.94 |
| 8256 | 49.225 | 0      | 0      | 0.68   | 155.61 |
| 8257 | 49.225 | 0      | 0      | 15.45  | 126.8  |
| 8258 | 49.225 | 0      | 0      | 43.91  | 89.96  |
| 8259 | 49.225 | 0      | 0      | 78.88  | 52.23  |
| 8260 | 49.225 | 0      | 0      | 113.5  | 20.39  |
| 8261 | 49.225 | 0      | 0      | 141.23 | 0.91   |
| 8262 | 49.225 | 0      | 0      | 155.21 | 0      |
| 8263 | 49.225 | 0      | 0      | 153.25 | 0      |
| 8264 | 49.225 | 0      | 0      | 151.28 | 0      |
| 8265 | 49.225 | 0      | 0      | 149.22 | 0      |
| 8266 | 49.225 | 0.55   | 0      | 138.97 | 0      |
| 8267 | 49.225 | 12.78  | 0      | 118.42 | 0      |
| 8268 | 49.225 | 36.47  | 0      | 91.74  | 0      |
| 8269 | 49.225 | 65.75  | 0      | 62.94  | 0      |
| 8270 | 49.225 | 95.04  | 0      | 35.79  | 0      |
| 8271 | 49.225 | 119.08 | 0      | 13.88  | 0      |
| 8272 | 49.225 | 132.89 | 0      | 0.56   | 0      |
| 8273 | 49.225 | 131.58 | 0      | 0      | 0      |
| 8274 | 49.225 | 129.65 | 0      | 0      | 0      |
| 8275 | 49.225 | 127.71 | 0      | 0      | 0      |
| 8276 | 49.225 | 125.78 | 0      | 0      | 0      |
| 8277 | 49.225 | 123.84 | 0      | 0      | 0      |
| 8278 | 49.225 | 116.06 | 0      | 0      | 0      |
| 8279 | 49.225 | 89.98  | 0      | 0      | 0      |
| 8227 | 55.475 | 124.8  | 0      | 158.54 | 0      |
| 8228 | 55.475 | 126.27 | 0      | 141.1  | 0      |
| 8229 | 55.475 | 127.74 | 0      | 103.15 | 0      |
| 8230 | 55.475 | 129.21 | 0      | 57.55  | 0      |
| 8231 | 55.475 | 130.67 | 0      | 17.76  | 0      |
| 8232 | 55.475 | 136.85 | 0      | 0      | 0      |
| 8233 | 55.475 | 149.59 | 8.31   | 0      | 0      |
| 8234 | 55.475 | 163.05 | 30.77  | 0      | 0      |
| 8235 | 55.475 | 170.68 | 62.65  | 0      | 0      |
| 8236 | 55.475 | 172.52 | 99.01  | 0      | 0      |
| 8237 | 55.475 | 148.44 | 134.68 | 0      | 0      |
| 8238 | 55.475 | 76.77  | 164.27 | 0      | 0      |
| 8239 | 55.475 | 10.69  | 181.34 | 0      | 0      |
| 8240 | 55.475 | 0      | 183.21 | 0      | 0      |
| 8241 | 55.475 | 0      | 185.08 | 0      | 0      |
| 8242 | 55.475 | 0      | 185.08 | 0      | 0      |
| 8243 | 55.475 | 0      | 183.21 | 0      | 0      |
| 8244 | 55.475 | 0      | 181.34 | 0      | 7.53   |
| 8245 | 55.475 | 0      | 179.47 | 0      | 30.03  |
| 8246 | 55.475 | 0      | 170.13 | 0      | 61.73  |
| 8247 | 55.475 | 0      | 144.85 | 0      | 96.96  |
| 8248 | 55.475 | 0      | 110.02 | 0      | 130.29 |
| 8249 | 55.475 | 0      | 71.97  | 0      | 156.51 |
| 8250 | 55.475 | 0      | 36.76  | 0      | 170.12 |
| 8251 | 55.475 | 0      | 10.2   | 0      | 168.25 |

|      |        |        |        |        |        |
|------|--------|--------|--------|--------|--------|
| 8252 | 55.475 | 0      | 0      | 0      | 166.38 |
| 8253 | 55.475 | 0      | 0      | 0      | 164.5  |
| 8254 | 55.475 | 0      | 0      | 0      | 155.42 |
| 8255 | 55.475 | 0      | 0      | 1.3    | 135.58 |
| 8256 | 55.475 | 0      | 0      | 18.52  | 108.89 |
| 8257 | 55.475 | 0      | 0      | 49.25  | 79.09  |
| 8258 | 55.475 | 0      | 0      | 85.44  | 49.77  |
| 8259 | 55.475 | 0      | 0      | 119.4  | 24.33  |
| 8260 | 55.475 | 0      | 0      | 143.83 | 6.03   |
| 8261 | 55.475 | 0      | 0      | 149.56 | 0      |
| 8262 | 55.475 | 0      | 0      | 147.69 | 0      |
| 8263 | 55.475 | 0      | 0      | 145.82 | 0      |
| 8264 | 55.475 | 1.26   | 0      | 141.59 | 0      |
| 8265 | 55.475 | 13.59  | 0      | 126.84 | 0      |
| 8266 | 55.475 | 35.19  | 0      | 104.28 | 0      |
| 8267 | 55.475 | 61.51  | 0      | 77.66  | 0      |
| 8268 | 55.475 | 88.19  | 0      | 50.5   | 0      |
| 8269 | 55.475 | 111.11 | 0      | 26.2   | 0      |
| 8270 | 55.475 | 126.38 | 0      | 7.92   | 0      |
| 8271 | 55.475 | 128.47 | 0      | 0      | 0      |
| 8272 | 55.475 | 126.64 | 0      | 0      | 0      |
| 8273 | 55.475 | 124.8  | 0      | 0      | 0      |
| 8274 | 55.475 | 122.97 | 0      | 0      | 0      |
| 8275 | 55.475 | 121.13 | 0      | 0      | 0      |
| 8276 | 55.475 | 119.29 | 0      | 0      | 0      |
| 8277 | 55.475 | 110.37 | 0      | 0      | 0      |
| 8278 | 55.475 | 83.94  | 0      | 0      | 0      |
| 8279 | 55.475 | 50.11  | 0      | 0      | 0      |
| 8227 | 61.725 | 114.94 | 0      | 145.74 | 0      |
| 8228 | 61.725 | 116.29 | 0      | 138.57 | 0      |
| 8229 | 61.725 | 117.64 | 0      | 108.05 | 0      |
| 8230 | 61.725 | 119    | 0      | 65.86  | 0      |
| 8231 | 61.725 | 120.35 | 0      | 25.28  | 0      |
| 8232 | 61.725 | 126.03 | 0      | 0.19   | 0      |
| 8233 | 61.725 | 138.87 | 9.98   | 0      | 0      |
| 8234 | 61.725 | 151.84 | 36.71  | 0      | 0      |
| 8235 | 61.725 | 157.2  | 73.14  | 0      | 0      |
| 8236 | 61.725 | 158.89 | 111.9  | 0      | 0      |
| 8237 | 61.725 | 146.45 | 145.31 | 0      | 0      |
| 8238 | 61.725 | 66.53  | 164.6  | 0      | 0      |
| 8239 | 61.725 | 0.06   | 166.31 | 0      | 0      |
| 8240 | 61.725 | 0      | 168.03 | 0      | 0      |
| 8241 | 61.725 | 0      | 169.74 | 0      | 0      |
| 8242 | 61.725 | 0      | 162.39 | 0      | 0      |
| 8243 | 61.725 | 0      | 139.32 | 0      | 0.03   |
| 8244 | 61.725 | 0      | 107.73 | 0      | 8.93   |
| 8245 | 61.725 | 0      | 72.93  | 0      | 30.16  |
| 8246 | 61.725 | 0      | 40.02  | 0      | 58.8   |
| 8247 | 61.725 | 0      | 13.91  | 0      | 90.15  |
| 8248 | 61.725 | 0      | 0      | 0      | 119.67 |
| 8249 | 61.725 | 0      | 0      | 0      | 143.02 |
| 8250 | 61.725 | 0      | 0      | 0      | 156.02 |
| 8251 | 61.725 | 0      | 0      | 0      | 154.31 |
| 8252 | 61.725 | 0      | 0      | 0      | 152.59 |

|      |        |        |        |        |        |
|------|--------|--------|--------|--------|--------|
| 8253 | 61.725 | 0      | 0      | 0      | 141.22 |
| 8254 | 61.725 | 0      | 0      | 0      | 114.35 |
| 8255 | 61.725 | 0      | 0      | 6.34   | 79.59  |
| 8256 | 61.725 | 0      | 0      | 41.45  | 44.23  |
| 8257 | 61.725 | 0      | 0      | 89.13  | 15.24  |
| 8258 | 61.725 | 0      | 0      | 129.2  | 0      |
| 8259 | 61.725 | 0      | 0      | 140.59 | 0      |
| 8260 | 61.725 | 0      | 0      | 138.88 | 0      |
| 8261 | 61.725 | 0      | 0      | 137.16 | 0      |
| 8262 | 61.725 | 0      | 0      | 131.04 | 0      |
| 8263 | 61.725 | 0      | 0      | 107.91 | 0      |
| 8264 | 61.725 | 0      | 0      | 74.86  | 0      |
| 8265 | 61.725 | 3.75   | 0      | 40.34  | 0      |
| 8266 | 61.725 | 18.57  | 0      | 12.37  | 0      |
| 8267 | 61.725 | 40.53  | 0      | 0      | 0      |
| 8268 | 61.725 | 65.4   | 0      | 0      | 0      |
| 8269 | 61.725 | 89.15  | 0      | 0      | 0      |
| 8270 | 61.725 | 107.99 | 0      | 0      | 0      |
| 8271 | 61.725 | 118.31 | 0      | 0      | 0      |
| 8272 | 61.725 | 116.63 | 0      | 0      | 0      |
| 8273 | 61.725 | 114.94 | 0      | 0      | 0      |
| 8274 | 61.725 | 113.25 | 0      | 0      | 0      |
| 8275 | 61.725 | 111.56 | 0      | 0      | 0      |
| 8276 | 61.725 | 109.81 | 0      | 0      | 0      |
| 8277 | 61.725 | 93.6   | 0      | 0      | 0      |
| 8278 | 61.725 | 61.49  | 0      | 0      | 0      |
| 8279 | 61.725 | 27.04  | 0      | 0      | 0      |
| 8227 | 67.975 | 102    | 0      | 127.5  | 0      |
| 8228 | 67.975 | 103.2  | 0      | 119.47 | 0      |
| 8229 | 67.975 | 104.4  | 0      | 82.05  | 0      |
| 8230 | 67.975 | 105.6  | 0      | 35.05  | 0      |
| 8231 | 67.975 | 106.82 | 0      | 1.93   | 0      |
| 8232 | 67.975 | 114.67 | 2.02   | 0      | 0      |
| 8233 | 67.975 | 128.27 | 16.88  | 0      | 0      |
| 8234 | 67.975 | 138    | 42.19  | 0      | 0      |
| 8235 | 67.975 | 139.5  | 72.98  | 0      | 0      |
| 8236 | 67.975 | 134.13 | 104.05 | 0      | 0      |
| 8237 | 67.975 | 79.62  | 129.95 | 0      | 0      |
| 8238 | 67.975 | 15.91  | 144    | 0      | 0      |
| 8239 | 67.975 | 0      | 145.5  | 0      | 0      |
| 8240 | 67.975 | 0      | 147    | 0      | 0      |
| 8241 | 67.975 | 0      | 148.5  | 0      | 0      |
| 8242 | 67.975 | 0      | 148.5  | 0      | 0      |
| 8243 | 67.975 | 0      | 137.35 | 0      | 0      |
| 8244 | 67.975 | 0      | 101.86 | 0      | 0      |
| 8245 | 67.975 | 0      | 56.78  | 0      | 6.67   |
| 8246 | 67.975 | 0      | 17.35  | 0      | 36.27  |
| 8247 | 67.975 | 0      | 0      | 0      | 76.9   |
| 8248 | 67.975 | 0      | 0      | 0      | 114.99 |
| 8249 | 67.975 | 0      | 0      | 0      | 137.55 |
| 8250 | 67.975 | 0      | 0      | 0      | 136.5  |
| 8251 | 67.975 | 0      | 0      | 0      | 135    |
| 8252 | 67.975 | 0      | 0      | 0      | 133.5  |
| 8253 | 67.975 | 0      | 0      | 0      | 132    |

|      |        |        |   |        |       |
|------|--------|--------|---|--------|-------|
| 8254 | 67.975 | 0      | 0 | 0      | 121.9 |
| 8255 | 67.975 | 0      | 0 | 3.41   | 92.61 |
| 8256 | 67.975 | 0      | 0 | 20.68  | 55.25 |
| 8257 | 67.975 | 0      | 0 | 46.86  | 20.94 |
| 8258 | 67.975 | 0      | 0 | 75.76  | 0.31  |
| 8259 | 67.975 | 0      | 0 | 101.49 | 0     |
| 8260 | 67.975 | 0      | 0 | 118.43 | 0     |
| 8261 | 67.975 | 0      | 0 | 120    | 0     |
| 8262 | 67.975 | 0      | 0 | 118.5  | 0     |
| 8263 | 67.975 | 0      | 0 | 109.32 | 0     |
| 8264 | 67.975 | 0.83   | 0 | 86.46  | 0     |
| 8265 | 67.975 | 8.77   | 0 | 57.17  | 0     |
| 8266 | 67.975 | 22.96  | 0 | 28.38  | 0     |
| 8267 | 67.975 | 40.86  | 0 | 6.71   | 0     |
| 8268 | 67.975 | 60.02  | 0 | 0      | 0     |
| 8269 | 67.975 | 78.14  | 0 | 0      | 0     |
| 8270 | 67.975 | 93.03  | 0 | 0      | 0     |
| 8271 | 67.975 | 102.64 | 0 | 0      | 0     |
| 8272 | 67.975 | 103.5  | 0 | 0      | 0     |
| 8273 | 67.975 | 102    | 0 | 0      | 0     |
| 8274 | 67.975 | 100.5  | 0 | 0      | 0     |
| 8275 | 67.975 | 99     | 0 | 0      | 0     |
| 8276 | 67.975 | 95.35  | 0 | 0      | 0     |
| 8277 | 67.975 | 74.6   | 0 | 0      | 0     |
| 8278 | 67.975 | 43.95  | 0 | 0      | 0     |
| 8279 | 67.975 | 15.19  | 0 | 0      | 0     |

## 5 Typical results: parameter estimation with local methods

In this section we report parameter estimation results obtained with local optimization techniques. Repeated local searches were launched in a multi-start procedure, starting from initial parameter vectors with values chosen randomly from within the parameter bounds. The number of local searches was fixed so that their overall CPU time was comparable to that consumed in optimizations where the global method eSS was used, which are reported in the next section. While there was great variability in the results obtained for the different benchmarks, a conclusion was common to all of them: in all cases, the local methods were outperformed by the global optimization method eSS. In the case of benchmark B1, all the local searches (with DHC, FMINSEARCH, FMINCON) failed to converge. The following figure shows histograms of the results obtained by the local methods (i.e., objective function values reached and the frequency with which they were found) for benchmarks B2–B6.

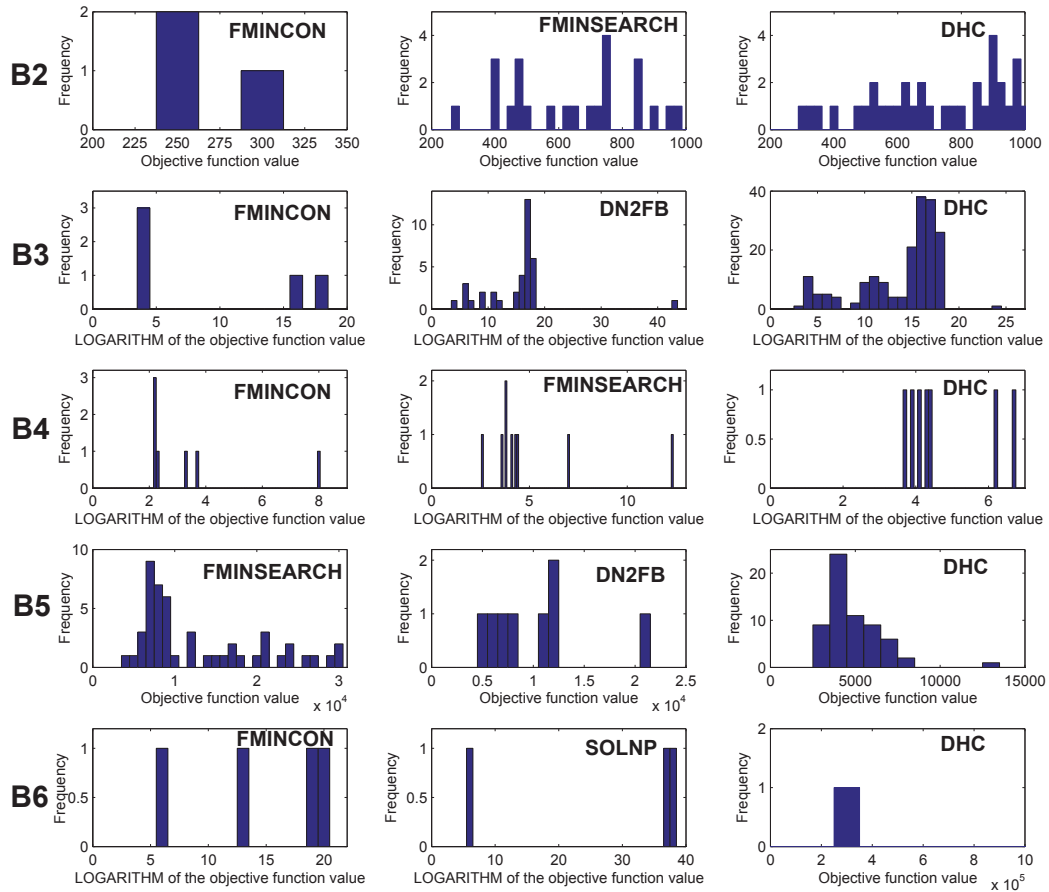

**Figure S2. Histograms of local searches.** The X axis shows the values of the solutions found by the different local methods, and the Y axis shows their frequency. The computational cost associated to each benchmark and to each method is different, hence the number of local searches performed varies from one method to another:

*Benchmark B2:* 5 local searches for FMINCON, 50 for FMINSEARCH and DHC. To improve visualization, only the results that achieved an objective function value  $f < 1000$  are shown (3/5 for FMINCON, 24/50 for FMINSEARCH, 34/50 for DHC).

*Benchmark B3:* 100 local searches for FMINCON, 1000 for DN2FB and DHC. Only the results that converged are shown (5/100 for FMINCON, 36/1000 for DN2FB, 188/1000 for DHC).

*Benchmark B4:* The number of local searches is 10 for every case. Only the results that converged are shown (7/10 for FMINCON, 9/10 for FMINSEARCH, 7/10 for DHC).

*Benchmark B5:* 10 local searches for FMINSEARCH, 100 for DN2FB and DHC.

*Benchmark B6:* 50000 local searches for FMINCON and DHC, 100000 for SOLNP. Only the results that converged are shown (3/50000 for FMINCON, 4/100000 for SOLNP, 1/50000 for DHC).

## 6 Typical results: parameter estimation with eSS

In this section we report parameter estimation results obtained with the eSS method [6] using the AMIGO toolbox implementation [2]. The main settings used with the eSS method are summarized in Table S25 below; they correspond to the default settings of the algorithm. The key element in the eSS algorithm is arguably the so-called Reference Set (RefSet): an evolving set of solutions which are selected for their quality and/or diversity, and which are combined among them to give new solutions (additionally, new solutions can be obtained from local searches launched from existing solutions). Therefore many of the settings refer to the way the RefSet is calculated. In the table, *nvar* stands for the number of unknown parameters. The local method and the maximum CPU time set are benchmark-dependent, and they are specified in Table 2 in the article. For further details of the eSS method the reader is referred to [6].

**Table S25.** Summary of eSS options

|                                                            |                                                                                                        |
|------------------------------------------------------------|--------------------------------------------------------------------------------------------------------|
| Number of initial solutions generated                      | 10·nvar                                                                                                |
| Number of elements in RefSet                               | Positive solution of $b \cdot (b - 1) - 10 \cdot \text{nvar} = 0$ , rounded to the closest even number |
| Type of RefSet initialization                              | Take bounds, middle point and fill by euclidean distance                                               |
| Type of combination of RefSet elements                     | Hyper-rectangles                                                                                       |
| Type of RefSet regeneration                                | Regeneration by distance diversity                                                                     |
| Max. number of RefSet elements deleted at regeneration     | Half of the RefSet elements                                                                            |
| Criterion for diversification in the RefSet                | Euclidean distance                                                                                     |
| Number of iterations between local searches                | 10                                                                                                     |
| Number of function evaluations before 1st local search     | 100·nvar                                                                                               |
| Min. number of function evaluations between local searches | 200·nvar                                                                                               |

Convergence curves of all the benchmarks are shown in figure S3 in the next page. Other results are reported in the subsequent subsections.

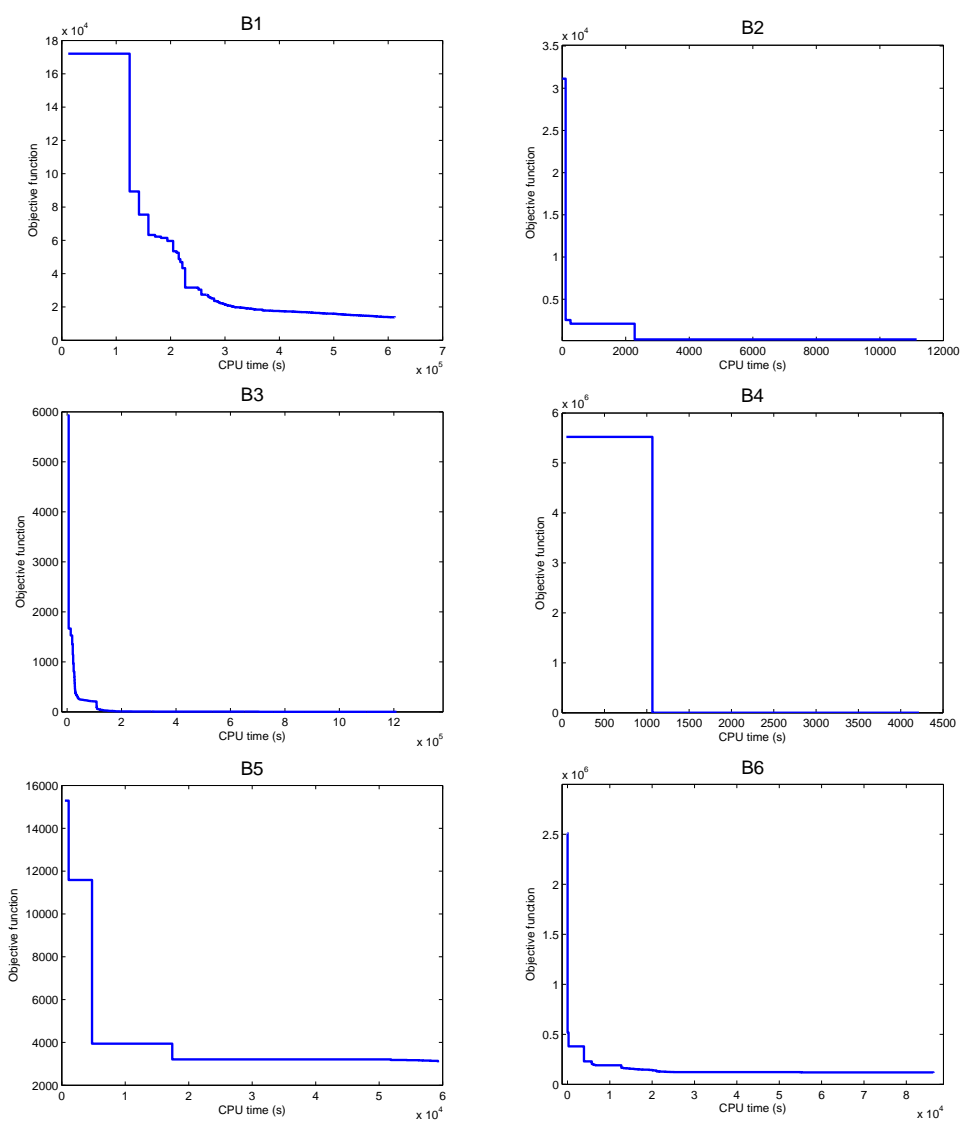

**Figure S3. Convergence curves.** Result of a typical parameter estimation with the eSS method. The figures plot the objective function value as a function of the computation time.



6.1 B1: *S. cerevisiae*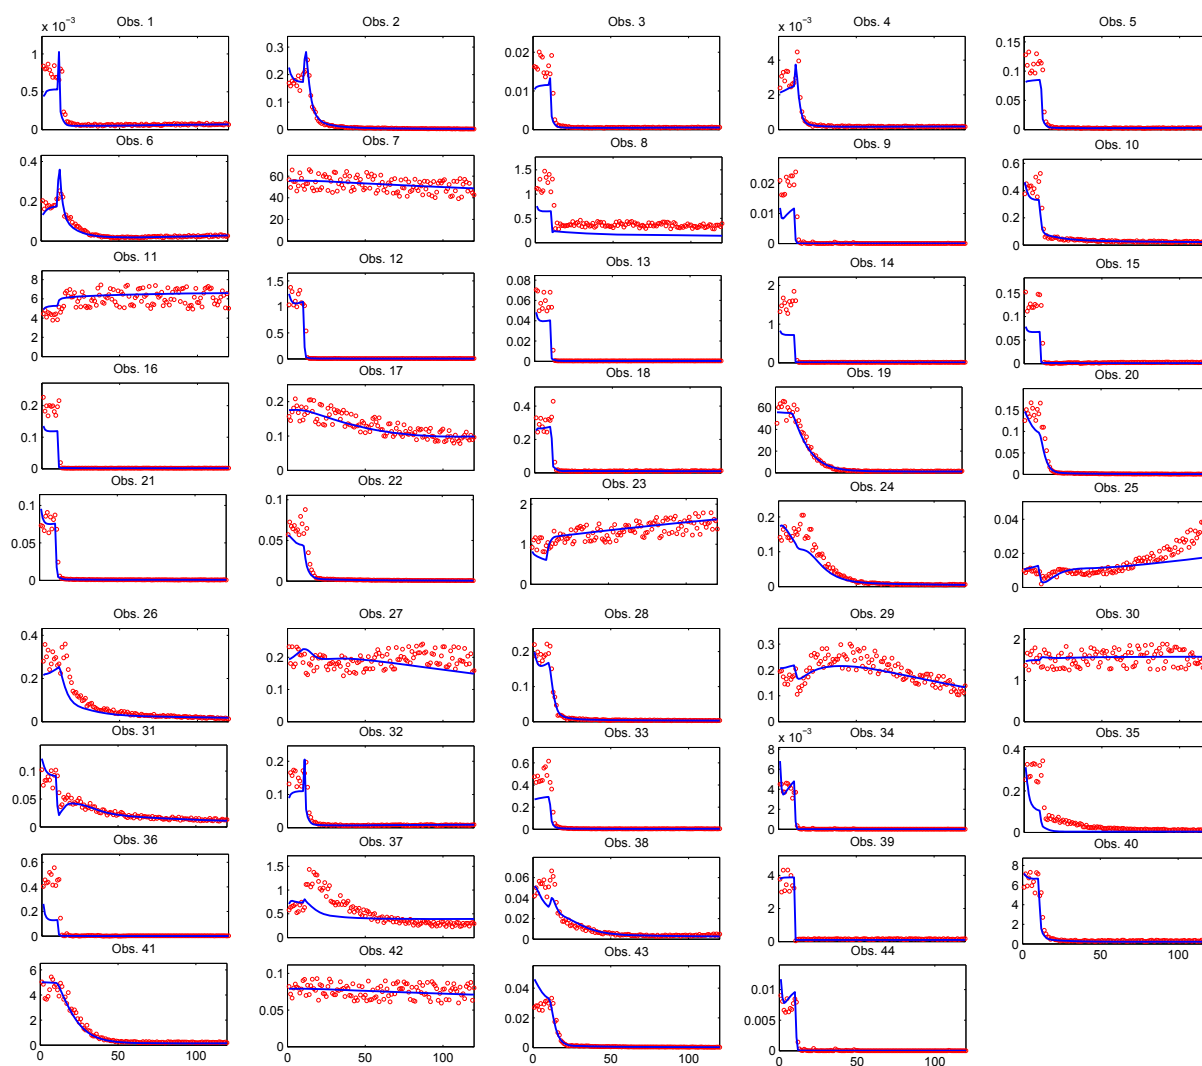

**Figure S4. Benchmark 1. Data fits: time courses.** Pseudo-experimental data (circles) vs. optimal solution (solid lines) for the 44 observed states. X axis: time [s]; Y axis: metabolite concentrations [mM].

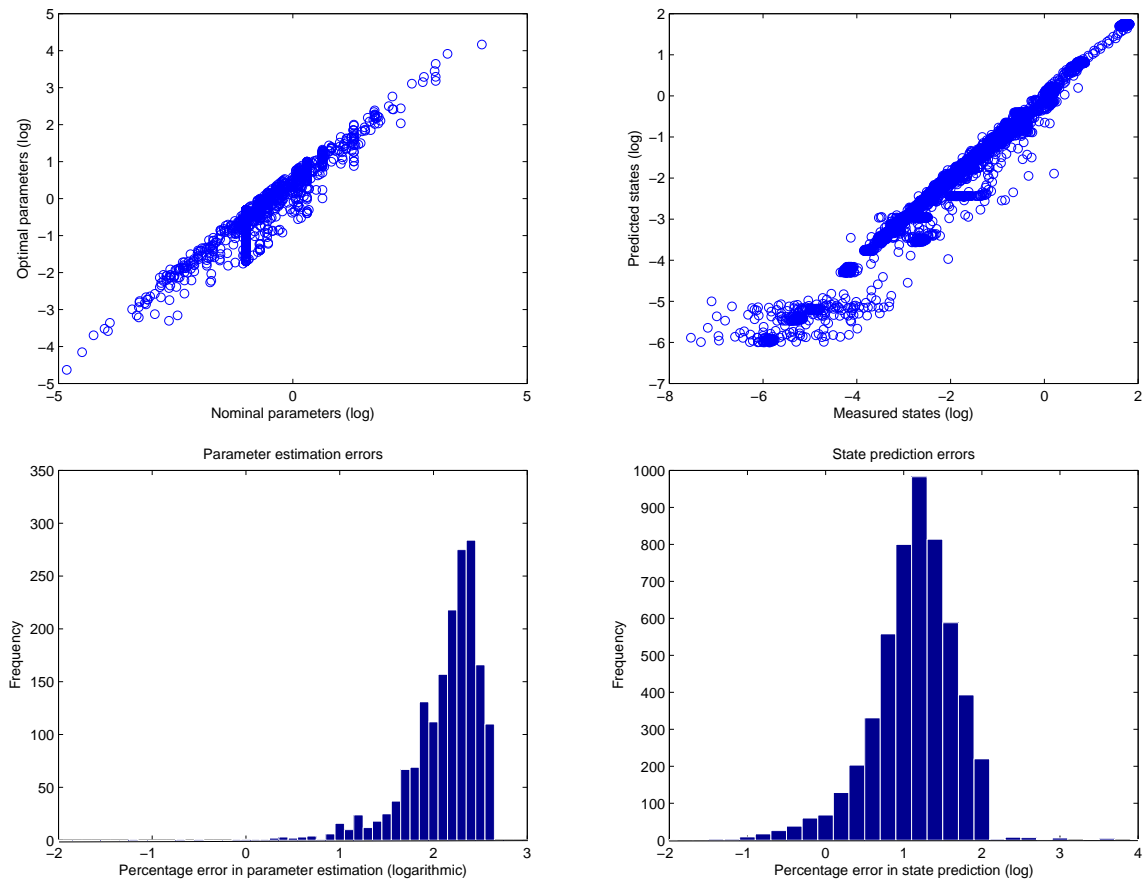

**Figure S5. Benchmark 1, typical parameter estimation results.** Left side: difference between the nominal parameter vector and the optimal solution. Top left: absolute values. Bottom left: histogram of the differences in %. Right side: data fits (states). Top right: pseudo-experimental vs. simulated data (optimal solution). Bottom right: histogram of the state errors in %.

## 6.2 B2: dynamic CCM of *E. coli*

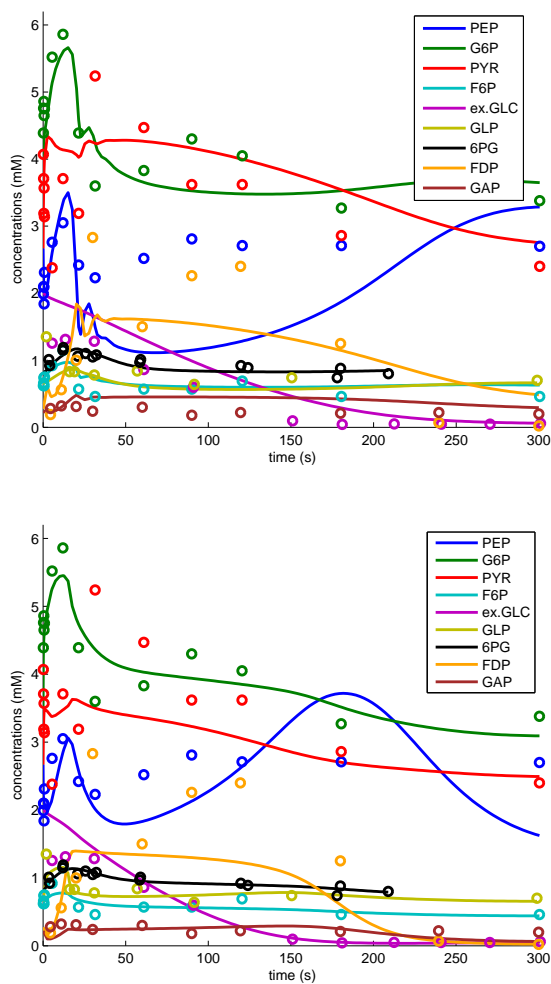

**Figure S6. Benchmark 2. Data fits: time courses.** Data (circles) vs. model simulations (solid lines), for the 9 metabolites for which there is experimental data available. Top: simulation with the parameter vector reported in the original publication [5]; Bottom: simulation with the optimized parameter vector. Note the improvement in the prediction of PEP and GAP.

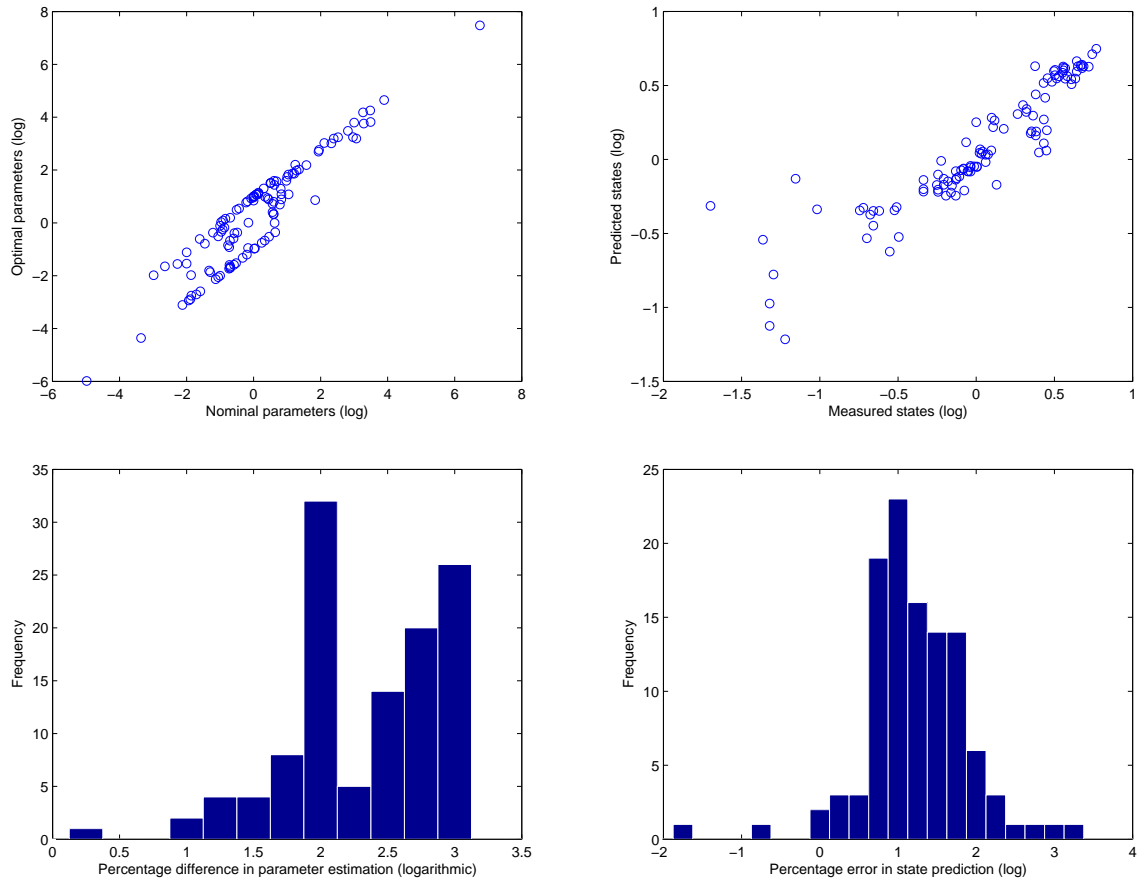

**Figure S7. Benchmark 2, typical parameter estimation results.** Left side: difference between the original parameter vector and the optimal solution. Top left: absolute values. Bottom left: histogram of the differences in %. Right side: data fits (states). Top right: experimental vs. simulated data (optimal solution). Bottom right: histogram of the state errors in %.

### 6.3 B3: regulation of the CCM of *E. coli*

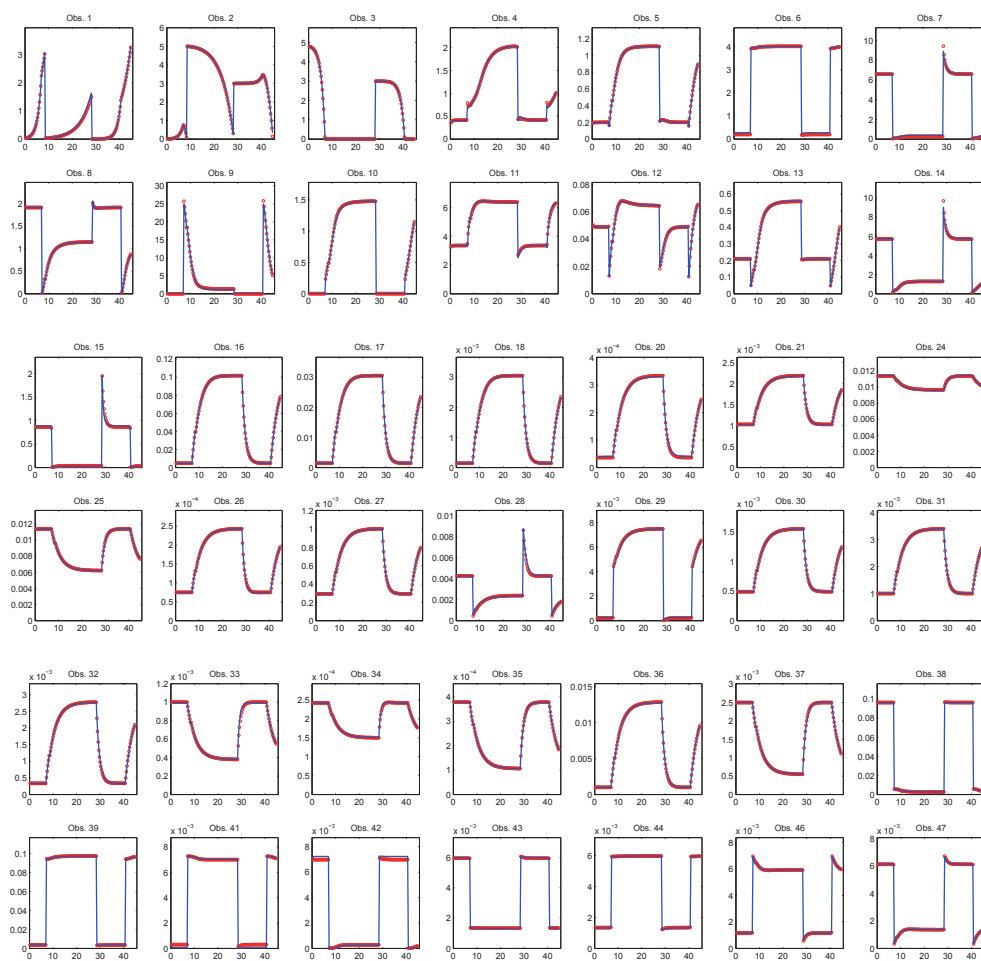

**Figure S8. Benchmark 3. Data fits: time courses.** Pseudo-experimental data (circles) vs. optimal solution (solid lines) for the 42 metabolites with time-varying concentration. The  $x$  axis represents the time in hours, while the  $y$  axis represents the magnitude of each state; the units of the states are  $g\ l^{-1}$  for carbon sources,  $\frac{\mu mol}{g_{DW}}$  for metabolites,  $\frac{g_{Prot}}{g_{DW}}$  for proteins, and [OD] for the biomass concentration.

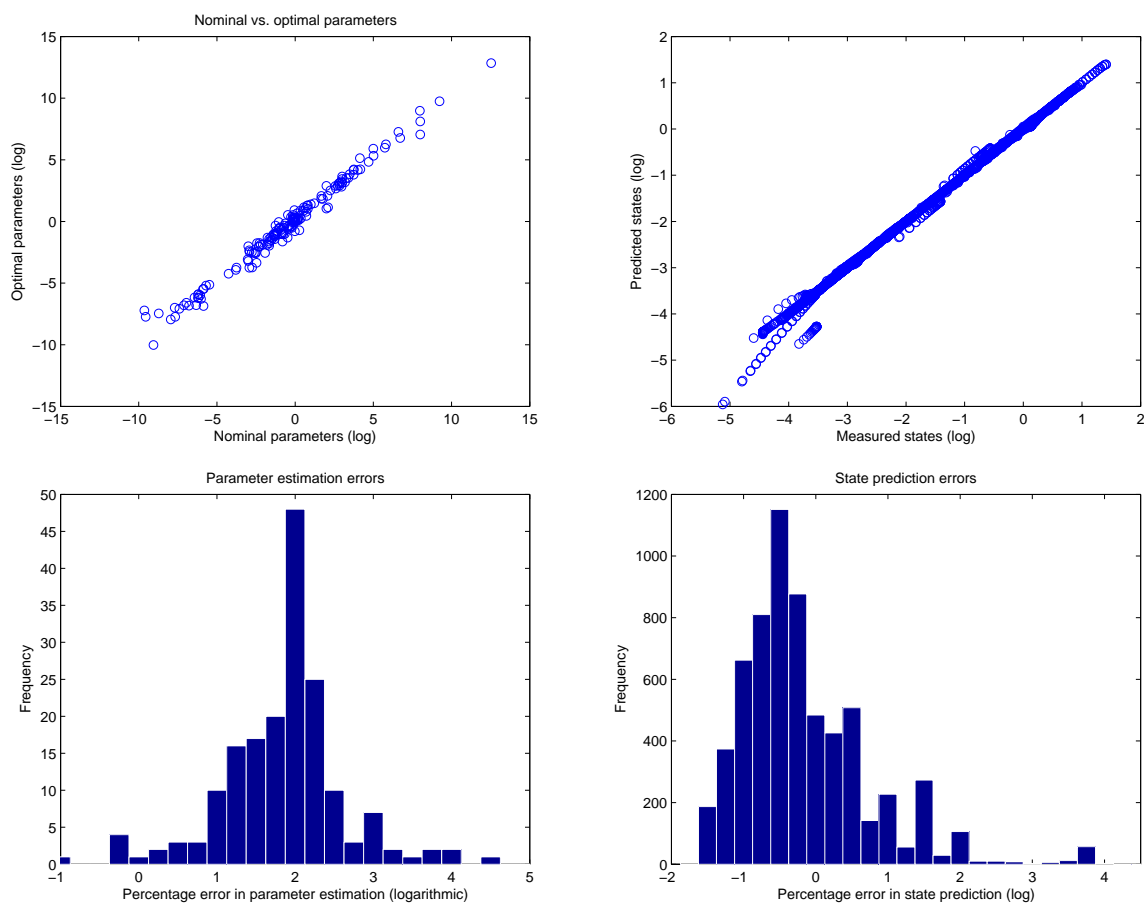

**Figure S9. Benchmark 3, typical parameter estimation results.** Left side: difference between the original parameter vector and the optimal solution. Top left: absolute values. Bottom left: histogram of the differences in %. Right side: data fits (states). Top right: pseudo-experimental vs. optimal data (optimal solution). Bottom right: histogram of the state errors in %. Note that some states corresponding to very low concentrations ( $< 10^{-6}$ ) are not included in the visualization.

## 6.4 B4: CHO

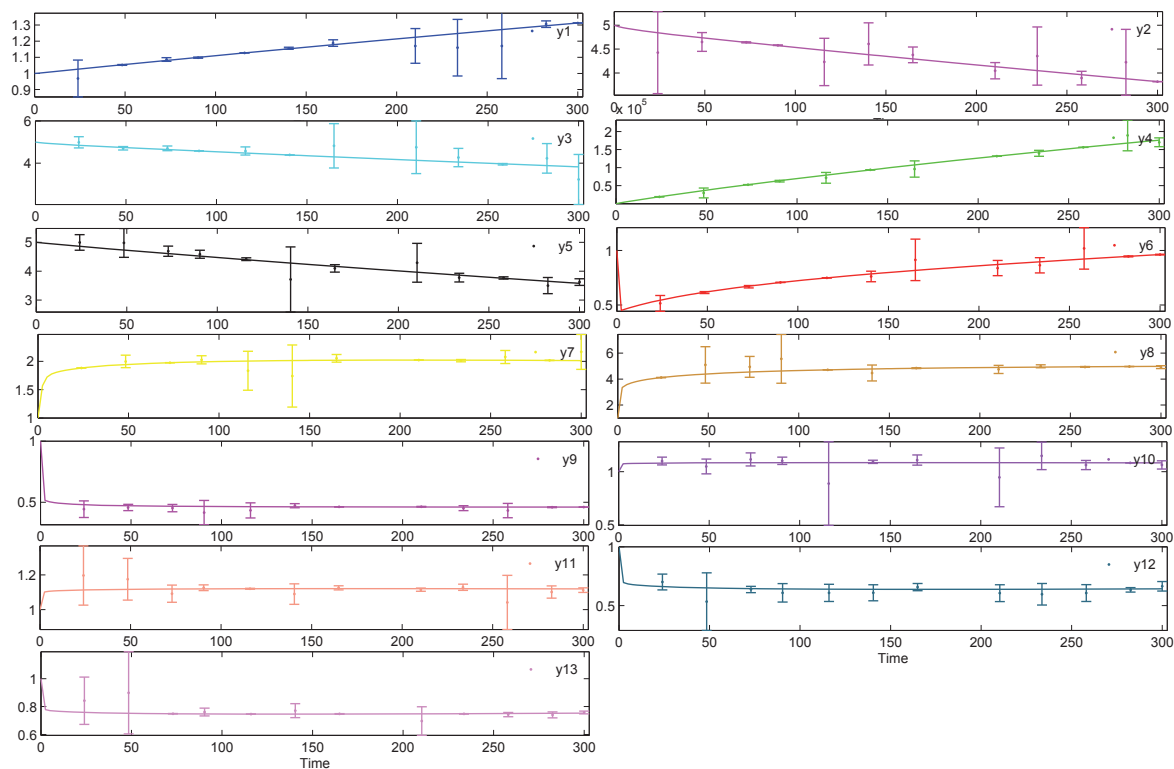

**Figure S10. Benchmark 4. Data fits: time courses.** Pseudo-experimental data (bars) vs. optimal solution (solid lines) for the 13 observed states. X axis: time [hours]; Y axis: metabolite concentrations [mM].

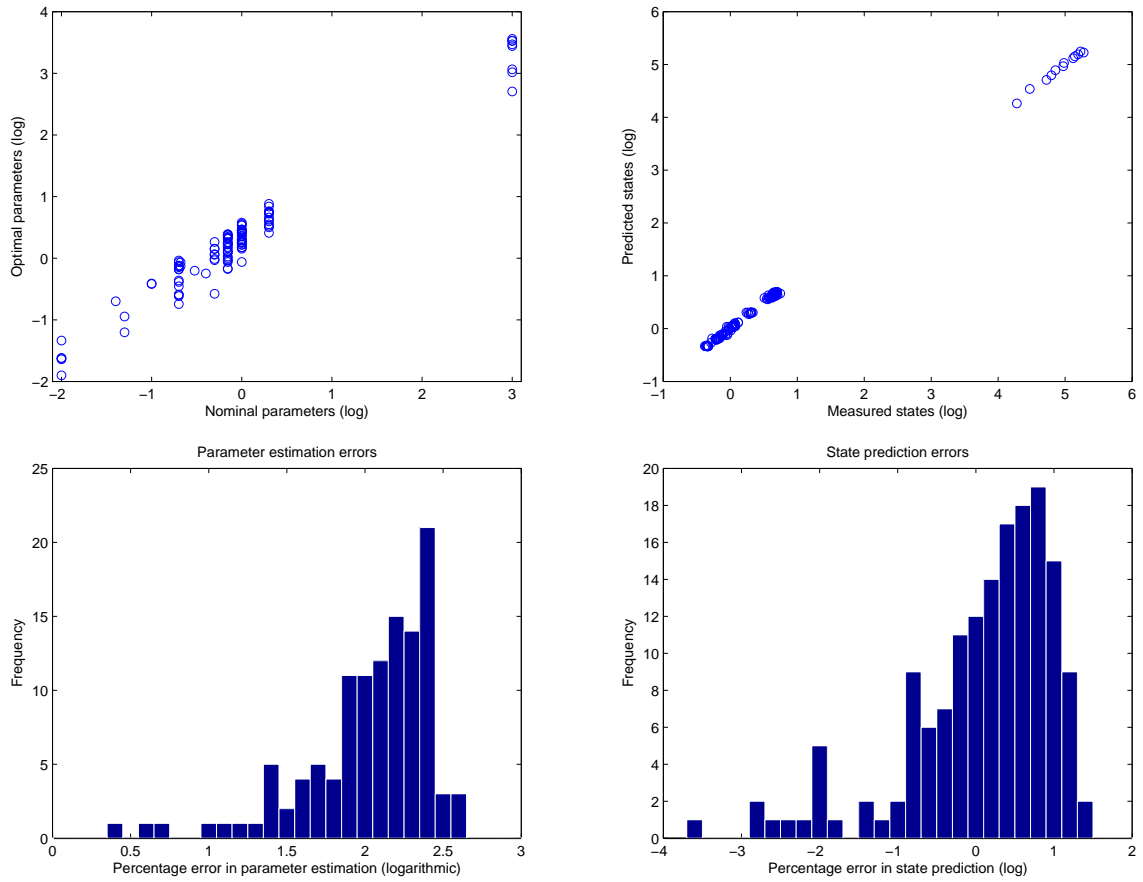

**Figure S11. Benchmark 4, typical parameter estimation results.** Left side: difference between the nominal parameter vector and the optimal solution. Top left: absolute values. Bottom left: histogram of the differences in %. Right side: data fits (states). Top right: pseudo-experimental vs. simulated data (optimal solution). Bottom right: histogram of the state errors in %.



## 6.5 B5: signal transduction logic model

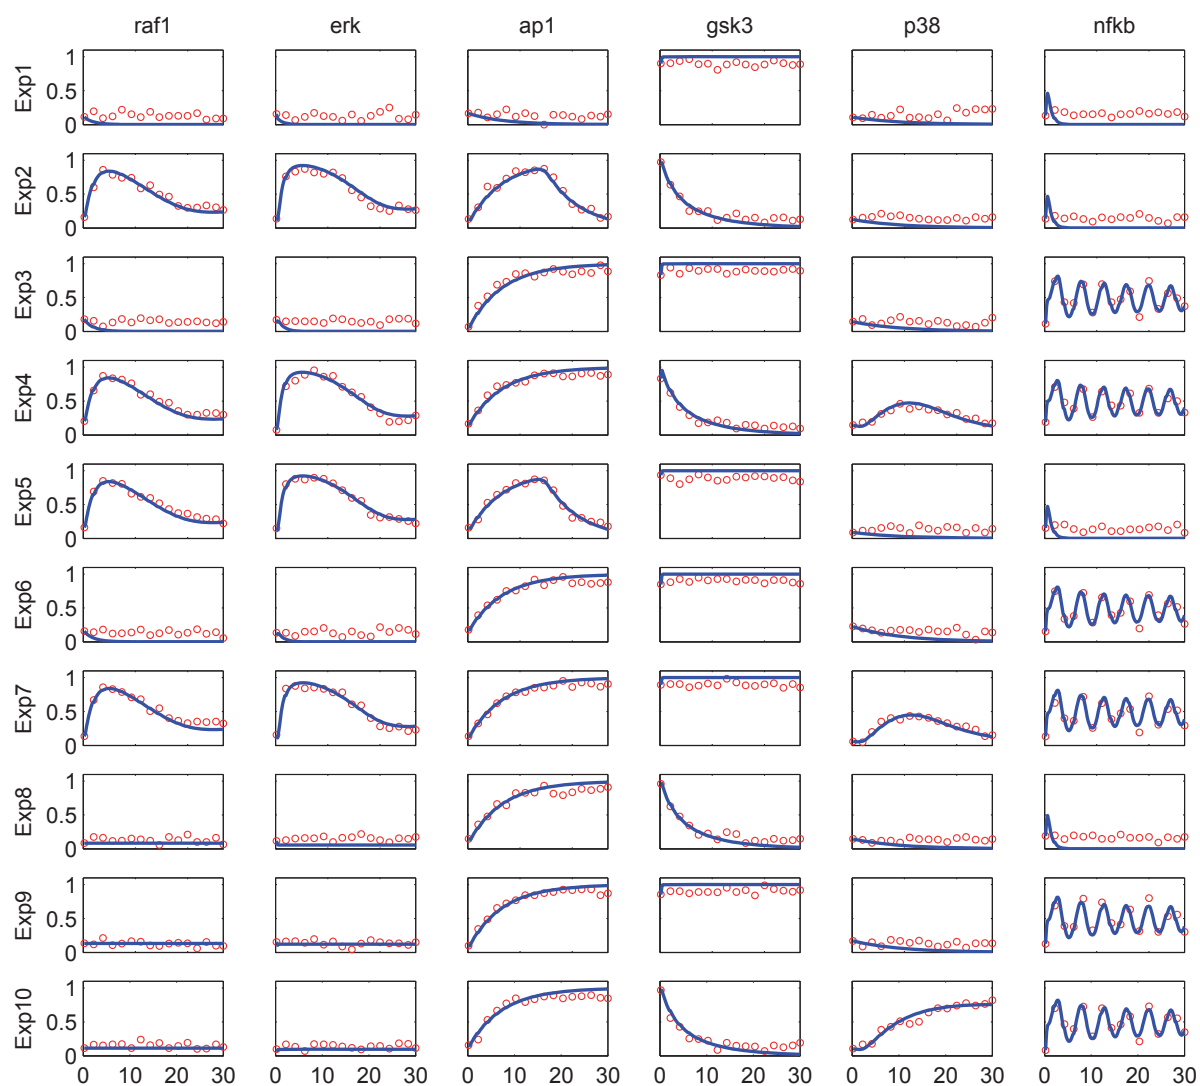

**Figure S12. Benchmark 5. Data fits: time courses.** Pseudo-experimental data (red stars) vs. optimal solution (solid blue lines) for the 6 observed states. X axis: time [minutes]. Y axis: activation level [0÷1]

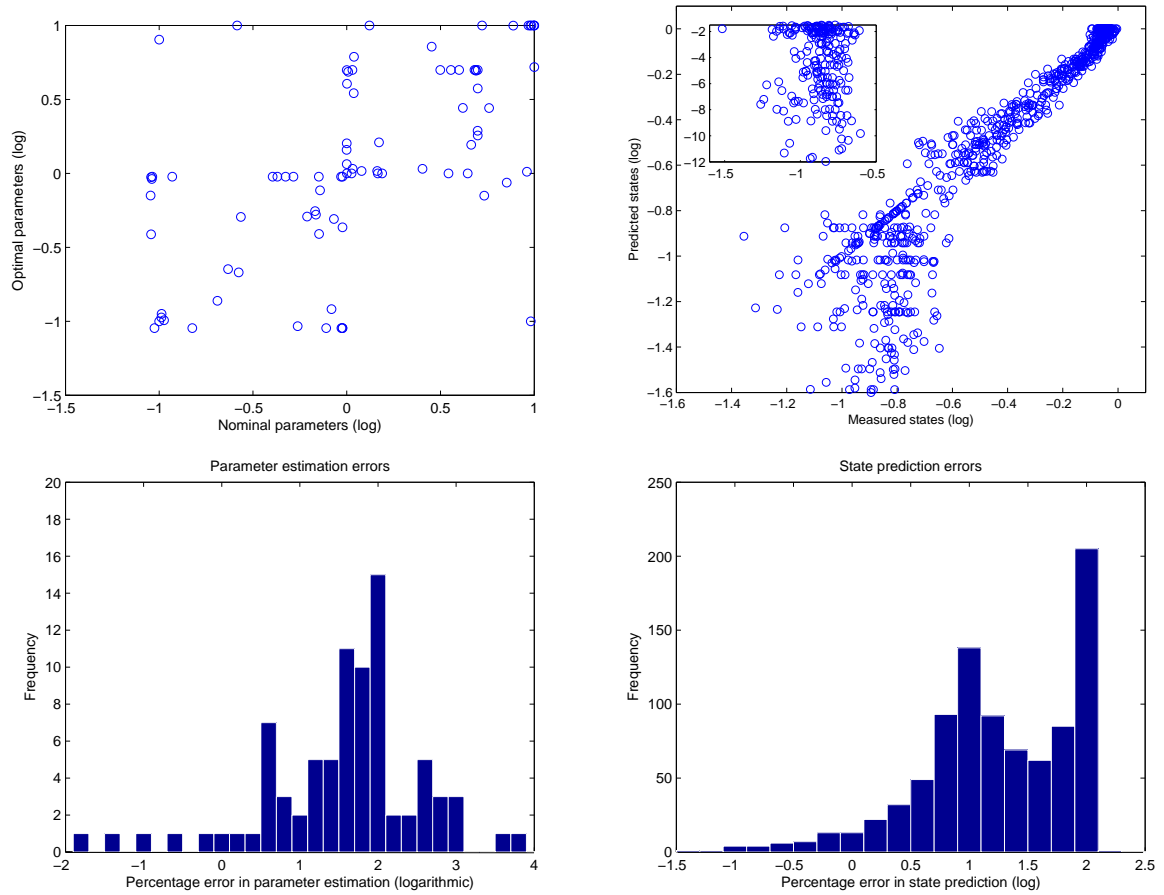

**Figure S13. Benchmark 5, typical parameter estimation results.** Left side: difference between the nominal parameter vector and the optimal solution. Top left: absolute values. Bottom left: histogram of the differences in %. Right side: data fits (states). Top right: pseudo-experimental vs. simulated data (optimal solution). Bottom right: histogram of the state errors in %.

## 6.6 B6: *Drosophila*

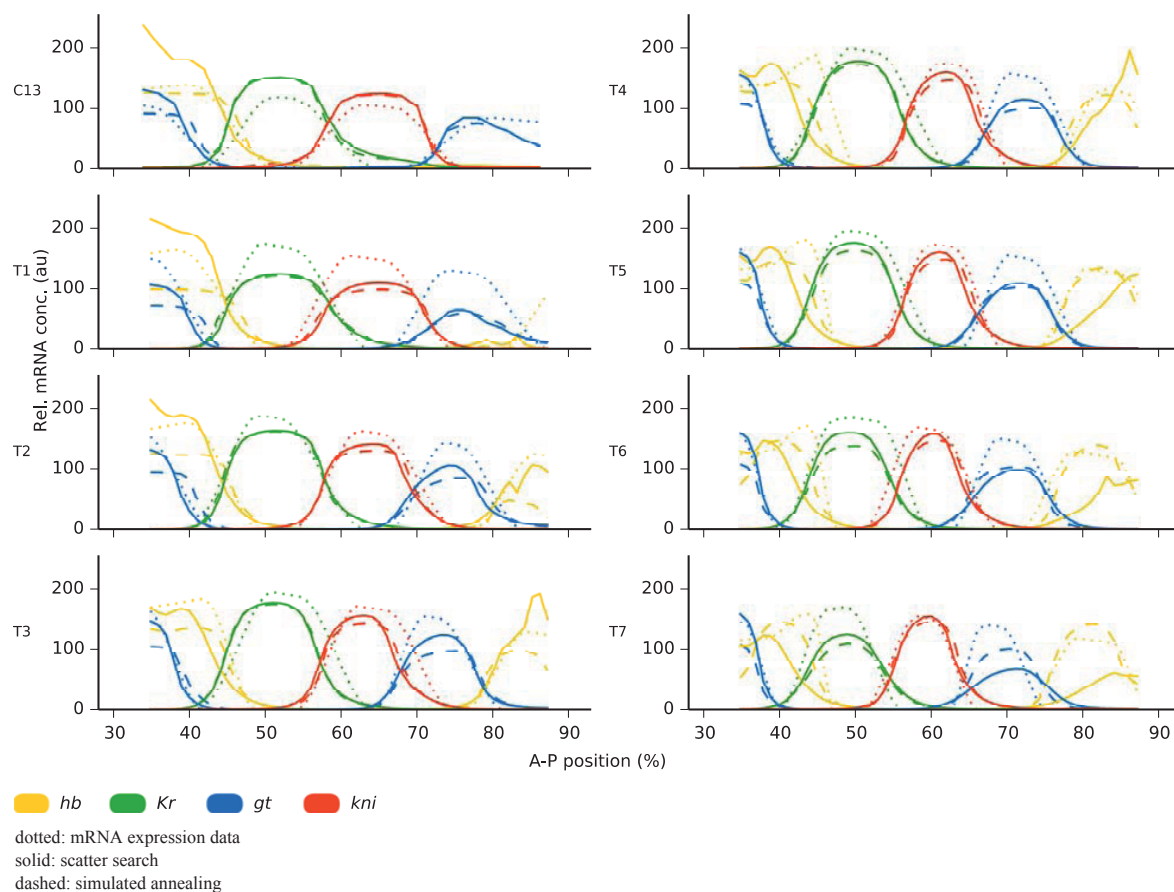

**Figure S14. Benchmark 6. Data fits: time courses.** Experimental data (dots) vs. optimal solution (solid lines –eSS solution– and dashed lines –simulated annealing solution–) for the 212 observed states corresponding to the 4 genes of the 53 nuclei, at different timepoints. X axis: A-P position [%]. Y axis: relative mRNA concentration.

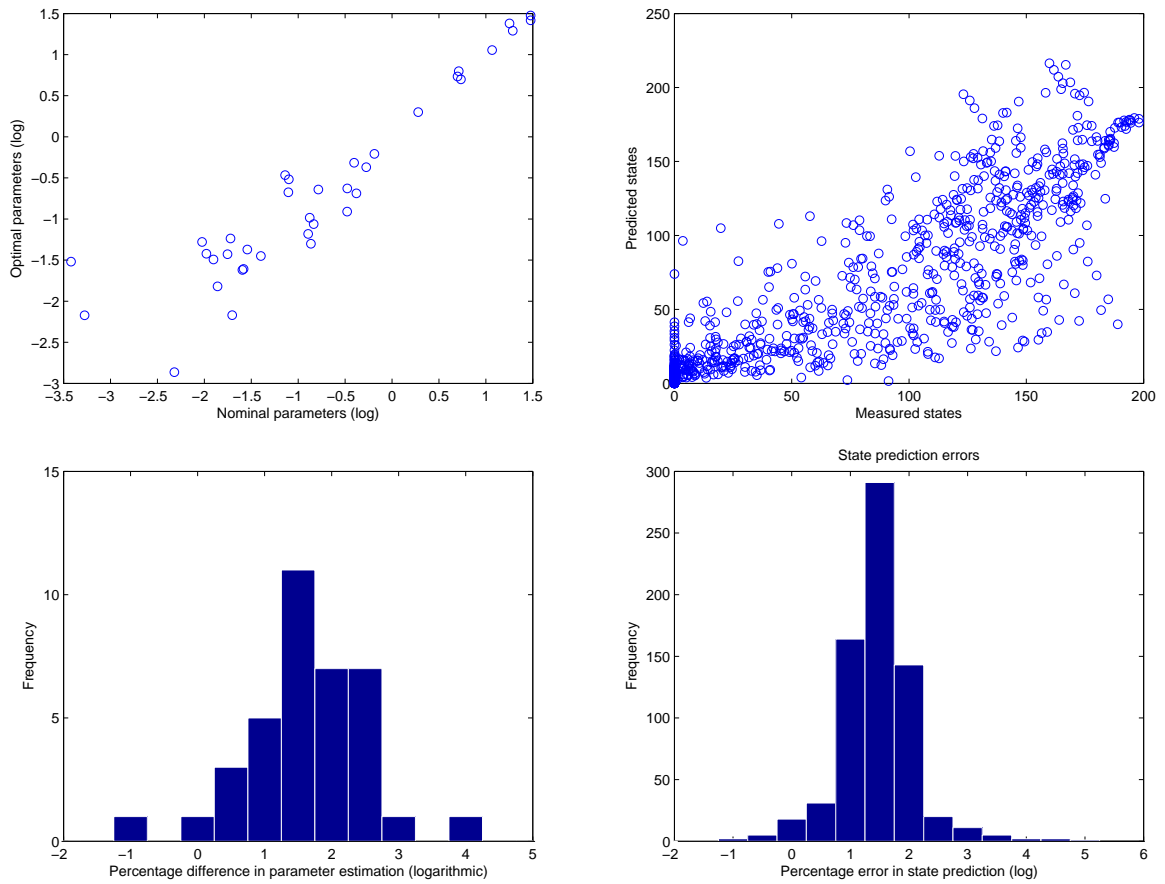

**Figure S15. Benchmark 6, typical parameter estimation results.** Left side: difference between the nominal parameter vector and the optimal solution. Top left: absolute values. Bottom left: histogram of the differences in %. Right side: data fits (states). Top right: pseudo-experimental vs. simulated data (optimal solution). Bottom right: histogram of the state errors in %.

## References

1. Hucka M, Finney A, Sauro HM, Bolouri H, Doyle JC, et al. (2003) The systems biology markup language (sbml): a medium for representation and exchange of biochemical network models. *Bioinformatics* 19: 524–531.
2. Balsa-Canto E, Banga JR (2011) Amigo, a toolbox for advanced model identification in systems biology using global optimization. *Bioinformatics* 27: 2311–2313.
3. Hoops S, Sahle S, Gauges R, Lee C, Pahle J, et al. (2006) Copasi – a complex pathway simulator. *Bioinformatics* 22: 3067–3074.
4. Davies O, Mendes P, Smallbone K, Malys N (2012) Characterisation of multiple substrate-specific (d) itp/(d) xtpase and modelling of deaminated purine nucleotide metabolism. *BMB Reports* 45: 259–264.
5. Chassagnole C, Noisommit-Rizzi N, Schmid JW, Mauch K, Reuss M (2002) Dynamic modeling of the central carbon metabolism of escherichia coli. *Biotechnol Bioeng* 79: 53–73.
6. Egea J, Henriques D, Cokelaer T, Villaverde A, MacNamara A, et al. (2014) Meigo: an open-source software suite based on metaheuristics for global optimization in systems biology and bioinformatics. *BMC Bioinformatics* 15: 136.
